# Supplementary material for: The relationships between democratic experience, adult health, and cause-specific mortality in 170 countries between 1980 and 2016: an observational analysis
Source: PubMed Central journal article supplement (PMC6484695; doi:10.1016/s0140-6736(19)30235-1), 2019-04-20
Supplement: mmc1.pdf [file mmc1.pdf]

# THE LANCET

## Supplementary appendix

This appendix formed part of the original submission and has been peer reviewed. We post it as supplied by the authors.

Supplement to: Bollyky TJ, Templin T, Cohen M, Schoder D, Dieleman JL, Wigley S. The relationships between democratic experience, adult health, and cause-specific mortality in 170 countries between 1980 and 2016: an observational analysis. *Lancet* 2019; published online March 13. [http://dx.doi.org/10.1016/S0140-6736\(19\)30235-1](http://dx.doi.org/10.1016/S0140-6736(19)30235-1).

## **SUPPLEMENTARY METHODS ANNEX**

The relationships between democratic experience, adult health, and cause-specific mortality in 170 countries between 1980 and 2016: an observational analysis

**Version:** March 1, 2019

## **SUPPLEMENTARY METHODS ANNEX**

### **1.0 Data**

1.1 Introduction

1.2 Data Sources

1.3 Descriptive Statistics

### **2.0 Statistical Analysis**

2.1 Synthetic Control Method

2.2 Shapely Variance Decomposition

2.3 Structural Equation Model

2.4 Leave-one-out Regression

### **3.0 Tables**

## 1.0 DATA

### Part 1.1: Introduction

The objective of this research is to assess whether a country's democratic experience is likely to matter more for health outcomes as the burden of disease shifts to non-communicable diseases (NCDs). We characterize the effect of having democratic experience on a country's health burden, focusing on how and why democracy affects NCDs. Our primary indicators come from several sources: measures of burden by cause from the Global Burden of Disease project, democratic experience indicators from the Varieties of Democracy project, and estimates of country-level health expenditure from the Financing Global Health database. We supplement these with covariates from the Global Burden of Disease project, including data on socio-demographics, disease risk factors, and health-care access and quality.

Using these data, we perform four analyses. The first utilizes the synthetic control method to characterize the effect of democratic transitions on HIV-free life expectancy at fifteen. The second is a Shapley variance decomposition of cause-specific communicable, non-communicable, and injury age-standardized death rates. The third is a structural equation model of the pathways by which democratic experience may improve health. The fourth is a "leave-one-out" regression that systematically drops components of the democratic experience indicator to determine which is most important in population health improvements.

The purpose of this appendix is to provide technical details on our data sources and methodology. We include information on all data sources in Section 1, statistical analyses in Section 2, and relevant country groupings in Section 3.

### Part 1.2: Data Sources

We used data from 10 sources to assess the effect of governance on health outcomes, especially non-communicable diseases.

#### **Institute for Health Metrics and Evaluation Global Burden of Disease Study 2016**

Death and disability-adjusted life year (DALY) estimates are from the Global Burden of Disease 2016 study.<sup>1</sup> The GBD 2016 reports age- and sex-specific DALY estimates for 333 diseases in 195 countries and territories from 1990 to 2016. The GBD 2016 also reports mortality estimates for 264 causes in 195 countries and territories from 1980 to 2016 and life expectancy from 1970-2016, both by age and sex.<sup>2</sup>

We extract cause-specific age- and sex-standardized death rates at the Level Two of the GBD cause hierarchy (see table 3.4). One way in which we deviate from the GBD cause hierarchy is while IHME combines HIV/AIDS and Tuberculosis as a single Level Two cause, for our analysis, we separate HIV/AIDS and Tuberculosis into individual causes. The rationale behind this is because of differences in treatment amenability, prevention, and prevalence. The other twenty Level Two causes are: diarrhea, lower respiratory, and other common infectious diseases; neglected tropical diseases and malaria; maternal disorders; neonatal disorders; nutritional deficiencies; other communicable, maternal, neonatal, and nutritional diseases; neoplasms; cardiovascular diseases; chronic respiratory diseases; cirrhosis and other chronic liver diseases; digestive diseases; neurological disorders; mental disorders; diabetes, urogenital, blood, and endocrine diseases; musculoskeletal disorders; other non-communicable diseases; transport injuries; unintentional injuries; self-harm and interpersonal violence; and forces of nature, conflict and terrorism, and executions and police conflict.

Additionally, we extract HIV-free life expectancy at fifteen, which provides an estimation of what life expectancy in each country and year would have been had the HIV pandemic had not occurred. The HIV-free life expectancy estimates also did not include mortality shocks caused by war and natural disasters.

#### **Institute for Health Metrics and Evaluation's GBD 2016 Covariates Database**

The Institute for Health Metrics and Evaluation's GBD 2016 Covariates database provides access to the 565 covariates used in the GBD 2016 modeling process for 195 countries and territories from 1980 to 2016.<sup>3</sup> We extracted mean years of education, age-standardized prevalence of smoking, prevalence of water sanitation, outdoor

air pollution, indoor air pollution, prevalence of skilled birth attendance, age-standardized obesity rates, mean sodium ingestion, age-standardized HIV prevalence, and mortality shocks. Mortality shocks are the mean mortality rate in the previous ten years due to military operations and terrorism, disasters, and famines (protein energy malnutrition deaths).

**Table 1.2.1: GBD Covariates Used**

| <b>GBD Covariate</b>                   | <b>Description<sup>3</sup></b>                                                                                                  |
|----------------------------------------|---------------------------------------------------------------------------------------------------------------------------------|
| Mean years of education                | Years of education per capita                                                                                                   |
| Age-standardized prevalence of smoking | The proportion between 0 and 1 of age-standardized smoking prevalence, both sexes combined                                      |
| Prevalence of water sanitation         | Percent of population with access to improved toilet types as defined by the Joint Monitoring Program                           |
| Outdoor air pollution                  | Population weighted average of particulate matter 2.5 micrograms per cubic meter                                                |
| Indoor air pollution                   | Household prevalence of cooking with coal or biomass                                                                            |
| Prevalence of skilled birth attendance | Percent of women giving birth with a skilled birth attendant (mainly nurses, doctors, and midwives)                             |
| Age-standardized obesity rates         | Age-standardized prevalence of obesity                                                                                          |
| Mean sodium ingestion                  | Grams per day of urinary sodium <sup>4</sup>                                                                                    |
| Age-standardized HIV prevalence        | “HIV age-standardized prevalence”                                                                                               |
| Mortality shocks                       | Mortality rate per person due to military operations and terrorism, disasters, and famines (protein energy malnutrition deaths) |
| Average daily calories intake          | Average daily calorie intake (total kcal/p/day avail). We use this as a predictor variable in the synthetic control analysis.   |

#### **Institute for Health Metrics and Evaluation’s Financing Global Health 2017 report**

We extract data from two related data sets in IHME’s Financing Global Health series. The Development Assistance for Health 2017 database includes health focus area and recipient country-specific development for health estimates for 188 countries from 1990 to 2016 and preliminary estimates for 2017.<sup>5</sup> The Financing Global Health 2017 database includes total health spending estimates (as well as its disaggregated components described below) for 188 countries from 1995 to 2015.<sup>6,7</sup>

Total health spending is defined by IHME as the sum of five mutually exclusive categories: government health spending, development assistance for health, out-of-pocket health spending, private insurance, and nongovernmental organization spending. IHME distinguishes government health spending in two categories: as agent and as source. Government health spending as source is country government spending on health exclusive of development assistance. Government health expenditure as agent measures funds that the country government spends on health, but those funds may be financed from an external source, e.g. a multilateral agency. In our analysis, we utilize development assistance for health and government health spending as source.

#### **Institute for Health Metrics and Evaluation GBD 2016 Population Estimates 1950-2016**

The Institute for Health Metrics and Evaluation GBD 2016 Population Estimates provide population estimates by location, age, and sex for 1950-2016.<sup>8</sup> These estimates are comprised of data from two sources: World Population Prospects: 2015 Revision, from the United Nations Population Division and the WHO Human Mortality Database. We use the population growth rate annual percentage, calculated using the exponential growth formula, as a predictor variable for the synthetic control analysis. The growth rate was calculated as follows:  $r = \ln(pn/p0)/n$ , where  $r$  is the exponential rate of growth,  $\ln()$  is the natural logarithm,  $pn$  is the end period population,  $p0$  is the beginning period population, and  $n$  is the number of years in between.

#### **Institute for Health Metrics and Evaluation GBD 2016 Socio-demographic Index**

The Institute for Health Metrics and Evaluation GBD 2016 Socio-demographic (SDI) index provides SDI estimates for 195 countries and territories from 1970-2016.<sup>9</sup> IHME considers average income per person, educational attainment, and total fertility rate (TFR) to calculate SDI values. In the index, a zero represents the lowest income

per capita, lowest educational attainment, and highest TFR, and one represents the highest income per capita, highest educational attainment, and lowest TFR observed across all geographies.

### **Institute for Health Metrics and Evaluation Global Educational Attainment 1970-2015**

The Institute for Health Metrics and Evaluation provides estimates of average years of educational attainment per capita for people over the age of 15 for the years 1970-2015 by year, sex, and age group for 188 countries, 21 GBD regions, 7 GBD super regions, and the global aggregate.<sup>10</sup> For females 15-44 and for both sexes in the 25 and older age group, the dataset includes age-standardized and population-weighted estimates. We use female educational attainment for ages 15-24 and male educational attainment for ages 15-24 as predictor variables in the synthetic control analysis.

### **Institute for Health Metrics and Evaluation Infant and Child Mortality Estimates by Country 1970-2010**

The Institute for Health Metrics and Evaluation provides estimates of neonatal, postneonatal, childhood, and under-5 mortality for 187 countries between 1970 and 2010.<sup>11</sup> We use under-5 deaths per 1000 live births as a predictor variable in the synthetic control analysis.

### **Varieties of Democracy**

Our indicator for democracy is drawn from the Varieties of Democracy (V-Dem) data set (Version 8).<sup>12</sup> That data set provides over 450 indicators of regime characteristics for 201 countries in the world from 1789 to 2017. Each of the political indicators in that data set is based on the responses of multiple country experts to a range of highly specific survey questions. The ratings of those experts were aggregated using Bayesian item response modelling techniques. This enabled the compilers to correct for measurement error and to create interval-level estimates for each indicator.<sup>13</sup> A significant advantage of the V-Dem data set is that it avoids many of the methodological problems that afflict the democracy indices that are by now standard in the literature (including Polity IV and Freedom House). Those problems include lack of precision, the use of different data sources over time, imprecise coding criteria, and the absence of inter-coder reliability tests.<sup>14,15</sup>

Our democratic stock variable is based on V-Dem's Multiplicative Polyarchy Index (v2x\_mpi). That index is the product of the five core components of electoral democracy: suffrage (v2x\_suffr), free and fair elections (v2xel\_frefair), elected officials (v2x\_elecoff), freedom of civil and political organization, including opposition political parties (v2x\_frassoc\_thick), and freedom of expression, including access to alternative information sources (v2x\_freexp\_altinf). Those components represent the mechanisms required to achieve responsiveness and accountability between leaders and citizens.<sup>16</sup> The five components are multiplied so as to capture the intuition that each is a necessary and complementary ingredient of democratic rule. Suffrage is not relevant if the executive is not elected, or opposition parties are illegal. Equally, the presence of opposition parties is not relevant if the incumbent can manipulate the electoral results to ensure victory, and so on.<sup>17</sup>

We constructed a stock measure of democracy by taking the sum of each country's score from 1900 to the observation year, applying a 1% annual depreciation rate. Slovakia is missing data in recent years, and so it is not included in our stock variable. This measure reflects both the age and the quality of democratic institutions in each country. As a result it allows us to examine the proximal and distal effects of democratic governance.<sup>18</sup> The policy shifts produced by democratic reform will often require an extended period of time to have an impact on population health. This is especially the case for the prevention and treatment of non-communicable diseases (e.g. anti-tobacco policies, training of health practitioners, investment in infrastructure, etc.). A modest 1% depreciation rate was included because the policies implemented even further back in time (e.g. during the first quarter of the 20th century) will have an increasingly smaller impact on population health in the present. We also use the Varieties of Democracy measure of domestic autonomy as a predictor variable in the synthetic control analysis.

**Figure 1.2.1: Map of Democratic Stock, 2016**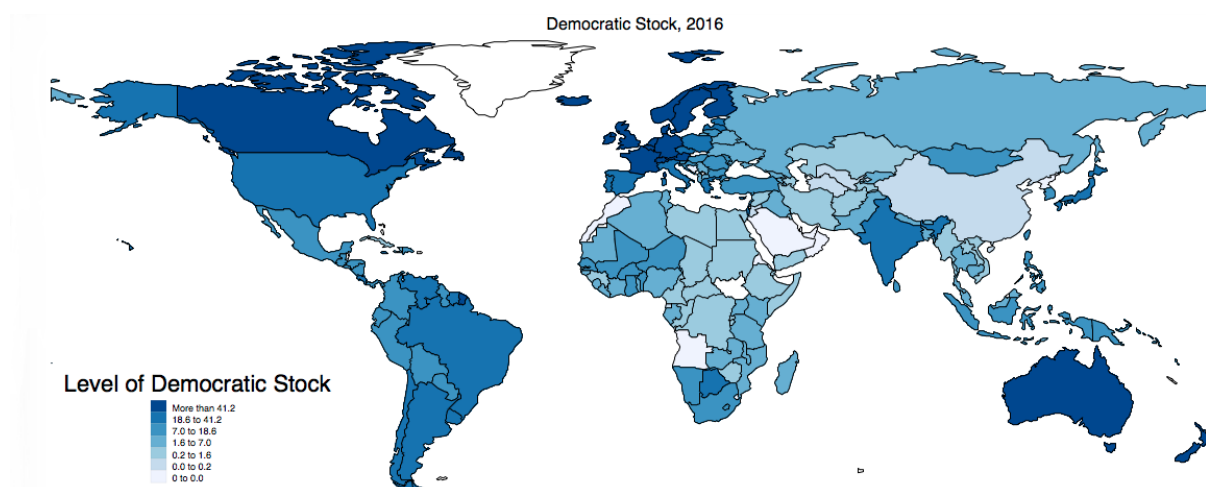**Figure 1.2.2: Map of Changes in Democratic Stock, 1990-2016**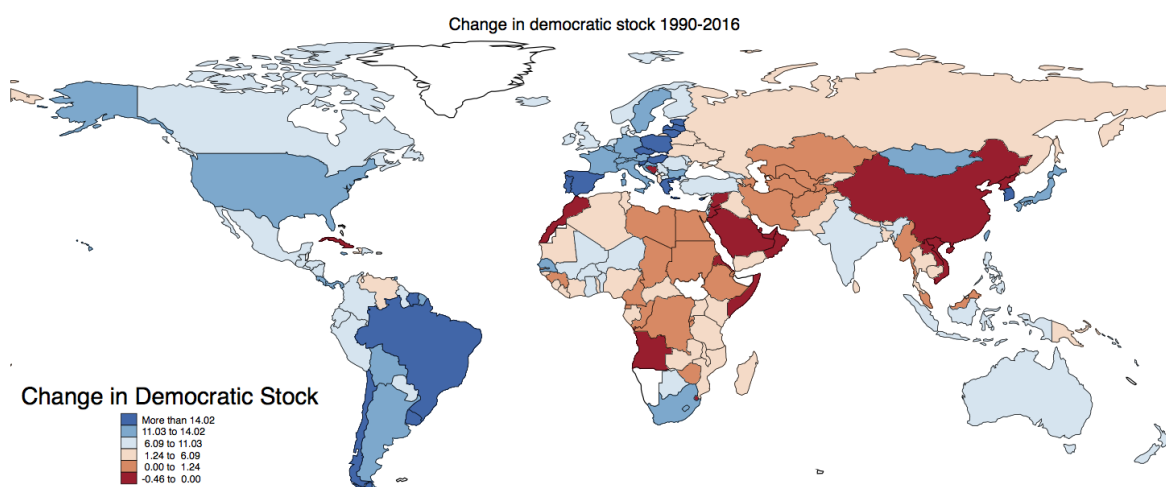

**Figure 1.2.3: Map of Percent Changes in Democratic Stock, 1990-2016**

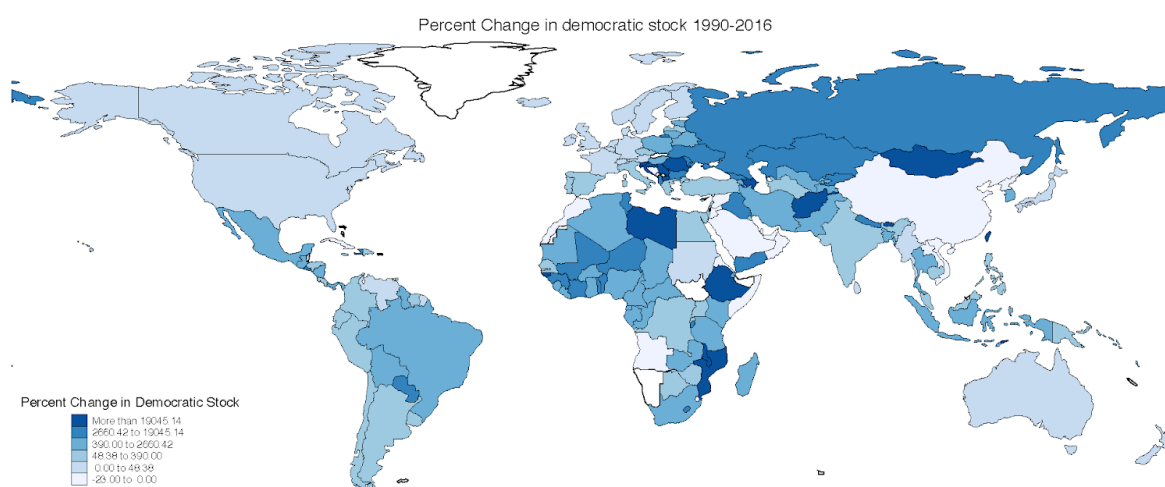

**Table 1.2.2: Descriptive Statistics on Distribution of Democratic Stock**

| Variable                                                | Mean   | Standard Deviation | Median<br>(Interquartile<br>Range) | Minimum | Maximum  |
|---------------------------------------------------------|--------|--------------------|------------------------------------|---------|----------|
| Democratic Stock<br>(1995)                              | 7.40   | 11.90              | 1.42 [7.76]                        | 0.00    | 46.30    |
| Democratic Stock<br>(2015)                              | 12.55  | 14.31              | 6.81 [16.47]                       | 0.00    | 53.60    |
| Percent change in<br>democratic stock<br>(1995 - 2015)  | 808.79 | 4277.26            | 164.11 [404.39]                    | -18.21  | 51359.96 |
| Absolute change in<br>democratic stock<br>(1995 - 2015) | 5.14   | 4.20               | 4.91 [7.63]                        | -0.38   | 13.84    |

### World Development Indicators 2017

Our indicator for urban population comes from the World Development Indicator Urban population (% of total), and it is available from 1960 to 2017 for 189 World Bank member countries, plus 28 other economies with populations of more than 30,000.<sup>19,20</sup> The urban population is defined by national statistical offices, and the indicator is calculated using World Bank population estimates and urban ratios from the United Nations World Urbanization Prospects.

### Data from 'Ruggedness: The blessing of bad geography in Africa' (Nunn and Puga 2012)

We use the percentage of land area with a tropical climate and the average distance to the nearest ice-free coast from "Ruggedness: The blessing of bad geography in Africa" by Nathan Nunn and Diego Puga (2012) as predictor variables in the synthetic control analysis.<sup>21</sup> The percentage of land area with a tropical environment is determined by classifying each cell on a 30 arc-minute grid covering the land area of the world into one of 31 climates in the Köppen-Geiger climate classification. The authors use this data to calculate the percentage of the land surface area of each country that has any of the four Köppen-Geiger tropical climates. For the distance to the nearest ice-free coast, the authors compute the distance to the nearest ice-free coast in thousands of kilometers for every point in each country using an equi-rectangular projection with standard parallels at 30 degrees. They then averaged this distance across all land in each country not covered by inland water features.



### Part 1.3: Descriptive Statistics

**Table 1.3.1: Descriptive Statistics of Variables Included in All Analyses**

| Variable Name                                                    |         | Mean  | Std. Dev | Min.  | Max.  |   | Observations | Years     |
|------------------------------------------------------------------|---------|-------|----------|-------|-------|---|--------------|-----------|
| Multiplicative polyarchy index (stock)                           | overall | 9.49  | 13.06    | 0     | 53.9  | N | 4563         | 1990-2016 |
|                                                                  | between |       | 12.84    | 0     | 49.24 | n | 169          |           |
|                                                                  | within  |       | 2.58     | -0.11 | 18.2  | T | 27           |           |
| Multiplicative polyarchy index (ordinal) [subset for Analysis 1] | overall | 0.26  | 0.40     | 0     | 1     | N | 1820         | 1990-2016 |
|                                                                  | between |       | 0.37     | 0     | 1     | n | 70           |           |
|                                                                  | within  |       | 0.16     | -0.70 | 0.94  | T | 26           |           |
| MPI without free association                                     | overall | 11.82 | 14.9     | 0     | 59.63 | N | 4583         | 1990-2016 |
|                                                                  | between |       | 14.63    | 0     | 54.65 | n | 170          |           |
|                                                                  | within  |       | 2.99     | 1.42  | 21.64 | T | 26.9588      |           |
| MPI without free & fair                                          | overall | 13.01 | 14.31    | 0     | 57.87 | N | 4583         | 1990-2016 |
|                                                                  | between |       | 13.93    | 0     | 53.67 | n | 170          |           |
|                                                                  | within  |       | 3.38     | 2.98  | 22.27 | T | 26.9588      |           |
| MPI without suffrage                                             | overall | 10.27 | 14.06    | 0     | 57.09 | N | 4583         | 1990-2016 |
|                                                                  | between |       | 13.85    | 0     | 52.73 | n | 170          |           |
|                                                                  | within  |       | 2.61     | 0.64  | 19.15 | T | 26.9588      |           |
| MPI without elected officials                                    | overall | 10.3  | 13.59    | 0     | 55.17 | N | 4583         | 1990-2016 |
|                                                                  | between |       | 13.36    | 0     | 50.54 | n | 170          |           |
|                                                                  | within  |       | 2.65     | 0.77  | 19.05 | T | 26.9588      |           |
| MPI without free expression                                      | overall | 11.58 | 14.42    | 0     | 58.27 | N | 4583         | 1990-2016 |
|                                                                  | between |       | 14.15    | 0     | 54.11 | n | 170          |           |
|                                                                  | within  |       | 2.93     | 1.6   | 20.96 | T | 26.9588      |           |
| Vote buying                                                      | overall | 19.34 | 16.1     | 0     | 65.22 | N | 4583         | 1990-2016 |
|                                                                  | between |       | 15.95    | 0     | 60.47 | n | 170          |           |
|                                                                  | within  |       | 2.45     | 9.02  | 29.23 | T | 26.9588      |           |
| Electoral board autonomy                                         | overall | 22.28 | 17.07    | 0     | 66.83 | N | 4583         | 1990-2016 |
|                                                                  | between |       | 16.73    | 0     | 62.64 | n | 170          |           |
|                                                                  | within  |       | 3.58     | 11.66 | 32.01 | T | 26.9588      |           |

|                                   |         |       |       |       |       |   |         |           |
|-----------------------------------|---------|-------|-------|-------|-------|---|---------|-----------|
| Electoral board capacity          | overall | 22.79 | 17.47 | 0     | 67.19 | N | 4583    | 1990-2016 |
|                                   | between |       | 17.18 | 0     | 62.81 | n | 170     |           |
|                                   | within  |       | 3.41  | 12.06 | 33    | T | 26.9588 |           |
|                                   |         |       |       |       |       |   |         |           |
| Election voter registry           | overall | 18.27 | 16.01 | 0     | 62.5  | N | 4583    | 1990-2016 |
|                                   | between |       | 15.75 | 0     | 57.66 | n | 170     |           |
|                                   | within  |       | 3.1   | 7.47  | 28.35 | T | 26.9588 |           |
|                                   |         |       |       |       |       |   |         |           |
| Other voting irregularities       | overall | 18.96 | 16.03 | 0     | 63.95 | N | 4583    | 1990-2016 |
|                                   | between |       | 15.83 | 0     | 59.27 | n | 170     |           |
|                                   | within  |       | 2.72  | 8.05  | 28.64 | T | 26.9588 |           |
|                                   |         |       |       |       |       |   |         |           |
| Election government intimidation  | overall | 18.17 | 15.57 | 0     | 62.67 | N | 4583    | 1990-2016 |
|                                   | between |       | 15.31 | 0     | 57.55 | n | 170     |           |
|                                   | within  |       | 3.04  | 7.77  | 28.27 | T | 26.9588 |           |
|                                   |         |       |       |       |       |   |         |           |
| Election other electoral violence | overall | 18.67 | 15.13 | 0     | 60.52 | N | 4583    | 1990-2016 |
|                                   | between |       | 14.89 | 0     | 56.13 | n | 170     |           |
|                                   | within  |       | 2.9   | 8.13  | 28.71 | T | 26.9588 |           |
|                                   |         |       |       |       |       |   |         |           |
| HIV-free Life Expectancy at 15    | overall | 58.16 | 5.15  | 44.63 | 69.23 | N | 4590    | 1990-2015 |
|                                   | between |       | 4.91  | 45.42 | 66.99 | n | 170     |           |
|                                   | within  |       | 1.59  | 50.61 | 64.24 | T | 27      |           |
|                                   |         |       |       |       |       |   |         |           |
| Urbanicity                        | overall | 0.53  | 0.23  | 0.05  | 1     | N | 4590    | 1990-2016 |
|                                   | between |       | 0.23  | 0.09  | 1     | n | 170     |           |
|                                   | within  |       | 0.04  | 0.39  | 0.71  | T | 26.9704 |           |
|                                   |         |       |       |       |       |   |         |           |
| Sodium                            | overall | 4     | 1.27  | 1.37  | 10.25 | N | 4590    | 1990-2016 |
|                                   | between |       | 1.28  | 1.37  | 10.23 | n | 170     |           |
|                                   | within  |       | 0.01  | 3.9   | 4.22  | T | 27      |           |
|                                   |         |       |       |       |       |   |         |           |
| Obesity Prevalence                | overall | 0.14  | 0.09  | 0     | 0.49  | N | 4590    | 1990-2016 |
|                                   | between |       | 0.08  | 0.01  | 0.48  | n | 170     |           |
|                                   | within  |       | 0.03  | 0.03  | 0.23  | T | 27      |           |
|                                   |         |       |       |       |       |   |         |           |
| Indoor Air Pollution              | overall | 0.41  | 0.38  | 0     | 1     | N | 4590    | 1990-2016 |
|                                   | between |       | 0.38  | 0     | 1     | n | 170     |           |
|                                   | within  |       | 0.07  | 0.13  | 0.85  | T | 27      |           |
|                                   |         |       |       |       |       |   |         |           |
| Outdoor Air Pollution             | overall | 17.62 | 10.81 | 2.94  | 75.54 | N | 4590    | 1990-2016 |

|                                                    |         |         |          |           |          |   |      |           |
|----------------------------------------------------|---------|---------|----------|-----------|----------|---|------|-----------|
|                                                    | between |         | 10.57    | 3.38      | 70.25    | n | 170  |           |
|                                                    | within  |         | 2.44     | 2.67      | 48.84    | T | 27   |           |
|                                                    |         |         |          |           |          |   |      |           |
| Smoking Prevalence                                 | overall | 0.16    | 0.08     | 0.01      | 0.36     | N | 4590 | 1990-2016 |
|                                                    | between |         | 0.08     | 0.01      | 0.34     | n | 170  |           |
|                                                    | within  |         | 0.02     | 0.07      | 0.26     | T | 27   |           |
|                                                    |         |         |          |           |          |   |      |           |
| Access to Safe Water                               | overall | 0.66    | 0.33     | 0.01      | 1        | N | 4590 | 1990-2016 |
|                                                    | between |         | 0.33     | 0.05      | 1        | n | 170  |           |
|                                                    | within  |         | 0.08     | 0.21      | 1.12     | T | 27   |           |
|                                                    |         |         |          |           |          |   |      |           |
| Mean Years of Education (Both sexes)               | overall | 7.71    | 3.63     | 0.69      | 15.18    | N | 4590 | 1990-2016 |
|                                                    | between |         | 3.55     | 1.3       | 14.36    | n | 170  |           |
|                                                    | within  |         | 0.82     | 5.26      | 10.66    | T | 27   |           |
|                                                    |         |         |          |           |          |   |      |           |
| Skilled Birth Attendance                           | overall | 0.81    | 0.23     | 0.09      | 1        | N | 4590 | 1990-2016 |
|                                                    | between |         | 0.22     | 0.16      | 0.99     | n | 170  |           |
|                                                    | within  |         | 0.07     | 0.48      | 1.2      | T | 27   |           |
|                                                    |         |         |          |           |          |   |      |           |
| GDP per capita                                     | overall | 13694.6 | 16659    | 294.31    | 125411.7 | N | 4590 | 1990-2016 |
|                                                    | between |         | 16107.21 | 513.26    | 91443.49 | n | 170  |           |
|                                                    | within  |         | 4421.55  | -23701.67 | 47662.78 | T | 27   |           |
|                                                    |         |         |          |           |          |   |      |           |
| Mortality Rate Shock                               | overall | -4.97   | 5.78     | -15.64    | 0        | N | 4590 | 1990-2016 |
|                                                    | between |         | 3.75     | -12.48    | 0        | n | 170  |           |
|                                                    | within  |         | 4.41     | -18.18    | 7.51     | T | 27   |           |
|                                                    |         |         |          |           |          |   |      |           |
| Maternal Education                                 | overall | 8.28    | 3.93     | 0.56      | 15.48    | N | 4590 | 1990-2016 |
|                                                    | between |         | 3.82     | 1.18      | 14.62    | n | 170  |           |
|                                                    | within  |         | 0.97     | 4.81      | 12.43    | T | 27   |           |
|                                                    |         |         |          |           |          |   |      |           |
| Age-standardized Cardiovascular Disease Death Rate | overall | 384.64  | 161.13   | 94.69     | 964.44   | N | 4590 | 1990-2016 |
|                                                    | between |         | 152.12   | 140.17    | 910.61   | n | 170  |           |
|                                                    | within  |         | 54.35    | 205.31    | 590.67   | T | 27   |           |
|                                                    |         |         |          |           |          |   |      |           |
| Age-standardized Cirrhosis Death Rate              | overall | 26.3    | 17.71    | 3.42      | 145.75   | N | 4590 | 1990-2016 |
|                                                    | between |         | 17.36    | 3.8       | 131.95   | n | 170  |           |
|                                                    | within  |         | 3.73     | 5.84      | 46.27    | T | 27   |           |
|                                                    |         |         |          |           |          |   |      |           |
| Age-standardized Diabetes Death Rate               | overall | 71.21   | 50.16    | 10.93     | 468.39   | N | 4590 | 1990-2016 |
|                                                    | between |         | 49.06    | 14        | 425.58   | n | 170  |           |
|                                                    | within  |         | 11.08    | -40.07    | 138.44   | T | 27   |           |

|                                                    |         |        |        |         |         |   |      |           |
|----------------------------------------------------|---------|--------|--------|---------|---------|---|------|-----------|
| Age-standardized Diarrheal Disease Death Rate      | overall | 139.99 | 153.3  | 5.2     | 701.29  | N | 4590 | 1990-2016 |
|                                                    | between |        | 146.81 | 8       | 520.67  | n | 170  |           |
|                                                    | within  |        | 45.51  | -72.46  | 389.39  | T | 27   |           |
| Age-standardized Digestive Disorders Death Rate    | overall | 26.97  | 17.69  | 4.74    | 92.96   | N | 4590 | 1990-2016 |
|                                                    | between |        | 17.17  | 5.51    | 82.14   | n | 170  |           |
|                                                    | within  |        | 4.45   | 4.14    | 62.46   | T | 27   |           |
| Age-standardized Unintentional Injuries Death Rate | overall | 33.16  | 18.04  | 4.4     | 94.46   | N | 4590 | 1990-2016 |
|                                                    | between |        | 17.31  | 6.35    | 79.86   | n | 170  |           |
|                                                    | within  |        | 5.24   | 10.56   | 65.03   | T | 27   |           |
| Age-standardized Forces Injuries Death Rate        | overall | 6.14   | 127.8  | 0.01    | 8125.12 | N | 4590 | 1990-2016 |
|                                                    | between |        | 26.24  | 0.01    | 314.25  | n | 170  |           |
|                                                    | within  |        | 125.09 | -308.04 | 7817.02 | T | 27   |           |
| Age-standardized HIV Death Rate                    | overall | 57.3   | 162.17 | 0       | 1460    | N | 4590 | 1990-2016 |
|                                                    | between |        | 142.4  | 0.03    | 823.64  | n | 170  |           |
|                                                    | within  |        | 78.33  | -683.64 | 762.59  | T | 27   |           |
| Age-standardized Maternal Causes Death Rate        | overall | 4.55   | 5.08   | 0.32    | 43.86   | N | 4590 | 1990-2016 |
|                                                    | between |        | 4.93   | 0.33    | 33.8    | n | 170  |           |
|                                                    | within  |        | 1.29   | -7.24   | 16.15   | T | 27   |           |
| Age-standardized Neonatal Causes Death Rate        | overall | 1.32   | 0.76   | 0.16    | 4.13    | N | 4590 | 1990-2016 |
|                                                    | between |        | 0.73   | 0.19    | 3.7     | n | 170  |           |
|                                                    | within  |        | 0.2    | 0.37    | 3.46    | T | 27   |           |
| Age-standardized Neoplasms Death Rate              | overall | 139.96 | 35.21  | 62.83   | 296.83  | N | 4590 | 1990-2016 |
|                                                    | between |        | 33.93  | 65.73   | 283.79  | n | 170  |           |
|                                                    | within  |        | 9.76   | 89.98   | 180.98  | T | 27   |           |
| Age-standardized Neurological Causes Death Rate    | overall | 45.94  | 9.13   | 27.35   | 91.44   | N | 4590 | 1990-2016 |
|                                                    | between |        | 9.05   | 29.29   | 88.57   | n | 170  |           |
|                                                    | within  |        | 1.36   | 35.37   | 53.07   | T | 27   |           |
| Age-standardized NTDs and Malaria Death Rate       | overall | 22.91  | 47.89  | 0.01    | 479.04  | N | 4590 | 1990-2016 |
|                                                    | between |        | 46.06  | 0.01    | 213.9   | n | 170  |           |
|                                                    | within  |        | 13.57  | -93.49  | 288.06  | T | 27   |           |

|                                                   |         |         |         |         |        |   |      |           |
|---------------------------------------------------|---------|---------|---------|---------|--------|---|------|-----------|
| Age-standardized Nutritional Disorders Death Rate | overall | 14.72   | 27.6    | 0.03    | 428.39 | N | 4590 | 1990-2016 |
|                                                   | between |         | 22.56   | 0.06    | 124.12 | n | 170  |           |
|                                                   | within  |         | 15.99   | -107.05 | 318.99 | T | 27   |           |
| Age-standardized Other Group 1 Causes Death Rate  | overall | 6.35    | 7.35    | 0.24    | 42.4   | N | 4590 | 1990-2016 |
|                                                   | between |         | 7.05    | 0.31    | 31.82  | n | 170  |           |
|                                                   | within  |         | 2.17    | -4.3    | 26.57  | T | 27   |           |
| Age-standardized Other NCDs Causes Death Rate     | overall | 12.14   | 6.3     | 2.39    | 47.3   | N | 4590 | 1990-2016 |
|                                                   | between |         | 5.9     | 3.79    | 36.02  | n | 170  |           |
|                                                   | within  |         | 2.24    | 1.23    | 41.13  | T | 27   |           |
| Age-standardized Respiratory Causes Death Rate    | overall | 55.16   | 43.92   | 9.69    | 433.15 | N | 4590 | 1990-2016 |
|                                                   | between |         | 42.57   | 14.2    | 384.98 | n | 170  |           |
|                                                   | within  |         | 11.29   | -30.74  | 141.21 | T | 27   |           |
| Age-standardized Tuberculosis Death Rate          | overall | 46.28   | 75.2    | 0.19    | 532.95 | N | 4590 | 1990-2016 |
|                                                   | between |         | 70.49   | 0.33    | 502.94 | n | 170  |           |
|                                                   | within  |         | 26.74   | -120.48 | 329.61 | T | 27   |           |
| Age-standardized Transport Death Rate             | overall | 23.04   | 12.02   | 3.83    | 83.74  | N | 4590 | 1990-2016 |
|                                                   | between |         | 11.29   | 6.31    | 65.28  | n | 170  |           |
|                                                   | within  |         | 4.2     | 3.31    | 75.61  | T | 27   |           |
| Age-standardized Violence Death Rate              | overall | 19.34   | 12.9    | 3.06    | 81.21  | N | 4590 | 1990-2016 |
|                                                   | between |         | 12.43   | 3.5     | 69.15  | n | 170  |           |
|                                                   | within  |         | 3.55    | -1.3    | 42.28  | T | 27   |           |
| Tropical Climate                                  | overall | 37.04   | 44.15   | 0       | 100    | N | 4563 | 1990-2016 |
|                                                   | between |         | 44.27   | 0       | 100    | n | 170  |           |
|                                                   | within  |         | 0       | 37.04   | 37.04  | T | 27   |           |
| Distance to Coast                                 | overall | 0.34    | 0.41    | 0       | 2.21   | N | 4563 | 1990-2016 |
|                                                   | between |         | 0.42    | 0       | 2.21   | n | 170  |           |
|                                                   | within  |         | 0       | 0.34    | 0.34   | T | 27   |           |
| DAH per capita                                    | overall | 14.16   | 25.86   | 0       | 446    | N | 3570 | 1995-2016 |
|                                                   | between |         | 18.09   | -0.19   | 94.57  | n | 170  |           |
|                                                   | within  |         | 18.53   | -76.37  | 369.54 | T | 21   |           |
| Total Health Spending per capita                  | overall | 1056.09 | 1410.07 | 16      | 9839   | N | 3570 | 1995-2016 |



|                   |         |        |        |         |         |   |       |           |
|-------------------|---------|--------|--------|---------|---------|---|-------|-----------|
| Population Growth | overall | 11.58  | 14.42  | 0       | 58.27   | N | 3220  | 1970-2015 |
|                   | between |        | 14.15  | 0       | 54.11   | n | 70    |           |
|                   | within  |        | 2.93   | 1.6     | 20.96   | T | 46    |           |
|                   |         |        |        |         |         |   |       |           |
| Tropical          | overall | 40.21  | 43.33  | 0       | 100     | N | 3220  | 1970-2015 |
|                   | between |        | 43.64  | 0       | 100     | n | 70    |           |
|                   | within  |        | 0      | 40.21   | 40.21   | T | 46    |           |
|                   |         |        |        |         |         |   |       |           |
| Distance to coast | overall | 0.36   | 0.39   | 0       | 1.84    | N | 3220  | 1970-2015 |
|                   | between |        | 0.39   | 0       | 1.84    | n | 70    |           |
|                   | within  |        | 0      | 0.36    | 0.36    | T | 46    |           |
|                   |         |        |        |         |         |   |       |           |
| Kilocalories      | overall | 2486.7 | 506.52 | 1367.53 | 4114.04 | N | 2520  | 1970-2015 |
|                   | between |        | 471.70 | 1568.71 | 3891.4  | n | 70    |           |
|                   | within  |        | 192.77 | 1501.73 | 3299.66 | T | 36    |           |
|                   |         |        |        |         |         |   |       |           |
| Domestic Autonomy | overall | 0.93   | 0.80   | -3.18   | 2.20    | N | 3220  | 1970-2015 |
|                   | between |        | 0.58   | -0.55   | 2.05    | n | 70    |           |
|                   | within  |        | 0.56   | -3.07   | 2.43    | T | 46    |           |
|                   |         |        |        |         |         |   |       |           |
| Ordinal MPI       | overall | 0.16   | 0.33   | 0       | 1       | N | 3217  | 1970-2015 |
|                   | between |        | 0.24   | 0       | 0.90    | n | 70    |           |
|                   | within  |        | 0.24   | -0.45   | 0.98    | T | 45.96 |           |
|                   |         |        |        |         |         |   |       |           |

## 2.0 STATISTICAL ANALYSIS

### Part 2.1: Synthetic Control Method

The synthetic control method estimates the impact of an event on an outcome by constructing a "synthetic control" of weighted comparator countries. In our analysis, the event was democratic transition, the outcome was HIV-free life expectancy at 15, and the synthetic control reflects countries that did not undergo a democratic transition. Thus, the synthetic control estimates the life expectancy trajectory that each transitioning country would have taken in the absence of the transition. The synthetic control method was first used by Abadie and Gardeazabal to show the effect of conflict on economic growth and subsequently the effect of an anti-tobacco program on cigarette sales.<sup>22,23</sup> This approach is particularly useful when no single untreated unit exists that is sufficiently similar to the treated unit. This is often the case for studies based on large aggregate units such as countries or regions.

The method was completed in three steps. First, we identified 15 countries that experienced an unambiguous democratic transition from 1980 to 2000. Second, we created synthetic controls for each of those 15 countries. The synthetic controls are a weighted set of countries that did not experience a democratic transition from 1970 to 2015. Weights were set such that the synthetic control compares directly to corresponding treatment countries closely on the pre-treatment characteristics described below. Third, the effect of democratisation was estimated by comparing the life expectancy trajectories of the democratising countries and their synthetic controls. Effect significance was determined by a permutation test.

### Identification of transitioning and non-transitioning states

Countries were classified as at least “minimally democratic” if they received a score of 1 on the ordinal version of V-Dem’s Multiplicative Polyarchy Index (e\_v2x\_mpi\_3C). Only those countries that became democratic between 1980 and 2000, and that stayed entirely democratic until at least 2015, were retained for the analysis. This meant that countries that became democratic before 1980 or after 2000 were excluded from the analysis. This provided us with at least 10 years lag time to construct the synthetic control and at least 15 years lead time to observe the effect. Based on those criteria we identified 15 “treatment” countries. In addition, we identified 55 “donor” countries that did not transition from autocracy to democracy at any time between 1970 and 2015. The treatment and donor countries are listed in Table 2.1.1.

Note: Some would classify Botswana and South Africa as non-democratic because there has not been a change in government in those countries since the transition took place.<sup>24</sup> Excluding those two countries from the analysis did not change the overall observed effect, but it did improve the statistical significance of the results.

**Table 2.1.1 Countries Used in the Synthetic Control Analysis**

| Country                          | Governance Status           |
|----------------------------------|-----------------------------|
| Afghanistan                      | Autocracy                   |
| Albania                          | Autocracy                   |
| Algeria                          | Autocracy                   |
| Angola                           | Autocracy                   |
| Bolivia                          | Democratic Transition: 1990 |
| Botswana                         | Democratic Transition: 1990 |
| Brazil                           | Democratic Transition: 1988 |
| Bulgaria                         | Democratic Transition: 1991 |
| Burkina Faso                     | Autocracy                   |
| Cambodia                         | Autocracy                   |
| Cameroon                         | Autocracy                   |
| Cape Verde                       | Democratic Transition: 1992 |
| Chad                             | Autocracy                   |
| China                            | Autocracy                   |
| Cote d’Ivoire                    | Autocracy                   |
| Cuba                             | Autocracy                   |
| Cyprus                           | Democratic Transition: 1981 |
| Democratic Republic of the Congo | Autocracy                   |



|                   |                             |
|-------------------|-----------------------------|
| Djibouti          | Autocracy                   |
| Egypt             | Autocracy                   |
| El Salvador       | Autocracy                   |
| Equatorial Guinea | Autocracy                   |
| Ethiopia          | Autocracy                   |
| Gabon             | Autocracy                   |
| Guinea            | Autocracy                   |
| Guyana            | Autocracy                   |
| Haiti             | Autocracy                   |
| Honduras          | Autocracy                   |
| Hungary           | Democratic Transition: 1990 |
| Iran              | Autocracy                   |
| Iraq              | Autocracy                   |
| Jordan            | Autocracy                   |
| Kenya             | Autocracy                   |
| Kuwait            | Autocracy                   |
| Laos              | Autocracy                   |
| Lesotho           | Autocracy                   |
| Libya             | Autocracy                   |
| Malawi            | Autocracy                   |
| Malaysia          | Autocracy                   |
| Mali              | Autocracy                   |
| Mauritania        | Autocracy                   |
| Mexico            | Democratic Transition: 2000 |
| Mongolia          | Democratic Transition: 1992 |
| Morocco           | Autocracy                   |
| Mozambique        | Autocracy                   |
| Myanmar           | Autocracy                   |

|              |                             |
|--------------|-----------------------------|
| North Korea  | Autocracy                   |
| Oman         | Autocracy                   |
| Panama       | Democratic Transition: 1991 |
| Philippines  | Autocracy                   |
| Poland       | Democratic Transition: 1990 |
| Qatar        | Autocracy                   |
| Russia       | Autocracy                   |
| Rwanda       | Autocracy                   |
| Saudi Arabia | Autocracy                   |
| Senegal      | Democratic Transition: 1996 |
| Seychelles   | Autocracy                   |
| Sierra Leone | Autocracy                   |
| Singapore    | Autocracy                   |
| Somalia      | Autocracy                   |
| South Africa | Democratic Transition: 1999 |
| South Korea  | Democratic Transition: 1989 |
| Swaziland    | Autocracy                   |
| Syria        | Autocracy                   |
| Taiwan       | Democratic Transition: 1999 |
| Tanzania     | Autocracy                   |
| The Gambia   | Autocracy                   |
| Togo         | Autocracy                   |
| Zambia       | Autocracy                   |
| Zimbabwe     | Autocracy                   |

### Estimation

In order to maximize the pre-treatment fit of the model we used the following predictors of adult life expectancy. GDP per capita and urbanicity capture economic wealth and development. Female and male educational attainment for ages 15-24 are included because education is a key driver of population health. Population growth rate and under-5 mortality capture the extent to which each country has undergone the demographic transition. Average calorie intake reflects nutrition levels, as well as the distribution of the food supply within each country. The limit to

how much food can be hoarded or consumed means that increases in mean calorie intake typically reflect an increase in the food supply for the poorest, at least in low- and middle-income countries.<sup>25</sup> Percentage of the land area with a tropical climate indicates the likelihood that a population is exposed to vector-borne diseases. Average distance to an ice-free coast is a key geographic determinant of long run economic growth and it may also affect the government's ability to supply public goods. Finally, degree of domestic control over policy is included because external governments may be less responsive to the health needs of the local population.

**Table 2.1.2: Predictor Variables in the Synthetic Control Analysis**

| Variable          | Description                                                                                                            | Source                                                         |
|-------------------|------------------------------------------------------------------------------------------------------------------------|----------------------------------------------------------------|
| Female education  | Female educational attainment for ages 15-24                                                                           | IHME Educational Attainment 1970-2015                          |
| Male education    | Male educational attainment for ages 15-24                                                                             | IHME Educational Attainment 1970-2015                          |
| Tropical Climate  | Percent land area with tropical climate                                                                                | Nunn and Puga, 2012                                            |
| Distance to Coast | Average distance to nearest ice-free coast                                                                             | Nunn and Puga, 2012                                            |
| Urbanicity        | Urban population, percentage of total                                                                                  | WDI*                                                           |
| GDP Per Capita    | GDP per capita                                                                                                         | IHME                                                           |
| Energy            | Average daily calorie intake (total kcal/p/day avail)                                                                  | GBD 2016 Covariates                                            |
| Under-5 mortality | Under-5 deaths per 1000 live births                                                                                    | IHME Infant and Child Mortality Estimates by Country 1970-2010 |
| Population growth | Population growth rate, annual percent (calculated using exponential growth formula)                                   | IHME Population Estimates                                      |
| Domestic Autonomy | A measure of how autonomous from the control of other states a state is with respect to the conduct of domestic policy | Varieties of Democracy (version 8)                             |

\*Taiwan is not included in the WDI urbanicity data, so its values come from the Varieties of Democracy urbanization data, which exists through 2010. The data from 2011-2015 is extrapolated.

15 synthetic countries were constructed corresponding to each of the 15 transitioning countries. This was achieved by weighting the continuously autocratic countries based on the degree to which their predictors resemble that of the transitioning country during the pre-treatment period (for a formal presentation of the method see Abadie et al, 2010, p. 493).<sup>23</sup> Table 2.1.3 compares the average pretreatment predictors for the treated countries with those of the synthetic countries, as well as with the average of the 55 untreated countries.

**Table 2.1.3: Predictor Variable Balance**

| Predictor         | Treated | Synthetic | Average of 55 Untreated Countries |
|-------------------|---------|-----------|-----------------------------------|
| Female Education  | 6.65    | 6.07      | 4.64                              |
| Male Education    | 6.77    | 6.50      | 5.34                              |
| Tropical Climate  | 21.69   | 29.39     | 45.26                             |
| Distance to Coast | 0.36    | 0.66      | 0.36                              |
| Urbanicity        | 50.77   | 53.98     | 39.93                             |
| GDP Per Capita    | 6816.96 | 10,137.25 | 7743.48                           |
| Under-5 mortality | 69.05   | 81.57     | 119.94                            |
| Population Growth | 1.78    | 1.91      | 2.60                              |
| Energy            | 2683.79 | 2568.57   | 2953.37                           |
| Domestic Autonomy | 0.64    | 0.98      | 1.27                              |

Note: All variables are the average for the ten years prior to treatment.

### Inference

Divergence between each transitioning country and its synthetic control after the transition year reflects the estimated effect of democratisation on adult life expectancy. Degree of fit during the pre-treatment period indicates how likely it is that each synthetic control reliably predicts the counterfactual path of the treated country. However, there remains some uncertainty over the path that the treated country would have taken in the absence of the treatment. To address that concern, we ran ‘placebo’ tests using each of the continuously autocratic countries (see Abadie et al, 2010, p. 496-7).<sup>23</sup> The same model is run on each of the untreated units, assuming they were treated at the same time. If the distribution of placebo effects displays a number of effects as large as the treatment effect, then it is likely that that effect was observed by chance. Thus, our test for statistical significance is the proportion of untreated countries that produced the same or greater estimated effect as the treated country. Note that this inferential method does not produce confidence intervals because the actual treatments were not randomly assigned across countries (see Abadie et al, 2015, p. 500).<sup>26</sup>

The placebo effects may be artificially large if those units were not matched well in the pre-treatment period. To control for this possibility, we excluded from inference those placebos where the pre-treatment match quality (root mean square prediction error) was 1.5 times worse than the treated unit. Nevertheless, that adjustment did not significantly alter the resulting p-values.

### Software

The `synth_runner` package for Stata was used to implement this method.<sup>27</sup> Based on the approach developed by Cavallo and colleagues, this package produces the average effect and p-values for multiple treatment units, with different treatment years.<sup>28</sup>

The following table lists the average effect on HIV-free life expectancy after 5 and 10 years, for each age level. There is a statistically significant effect, after 10 years, across all ages.

**Table 2.1.4: Average Effect of Democratic Transitions on HIV-free Life Expectancy Across the Lifespan**

| <b>HIV-free life expectancy at:</b> | <b>Average effect after 5 years (%)</b> | <b>Average effect after 10 years (%)</b> | <b>Average p value after 10 years</b> |
|-------------------------------------|-----------------------------------------|------------------------------------------|---------------------------------------|
| < 1                                 | 1.36                                    | 1.83                                     | 0.0422                                |
| 1                                   | 1.59                                    | 1.83                                     | 0.0274                                |
| 5                                   | 2.16                                    | 2.46                                     | 0.0024                                |
| 10                                  | 2.5                                     | 2.81                                     | 0.0016                                |
| 15                                  | 2.77                                    | 3.1                                      | 0.0012                                |
| 20                                  | 3.02                                    | 3.37                                     | 0.0011                                |
| 25                                  | 3.21                                    | 3.54                                     | 0.0012                                |
| 30                                  | 3.44                                    | 3.75                                     | 0.0014                                |
| 35                                  | 3.68                                    | 3.95                                     | 0.0018                                |
| 40                                  | 3.87                                    | 4.2                                      | 0.002                                 |
| 45                                  | 3.96                                    | 4.42                                     | 0.0019                                |
| 50                                  | 3.97                                    | 4.61                                     | 0.0024                                |
| 55                                  | 4.05                                    | 4.89                                     | 0.0027                                |
| 60                                  | 4.01                                    | 5.07                                     | 0.0028                                |
| 65                                  | 4.18                                    | 5.47                                     | 0.0017                                |
| 70                                  | 3.73                                    | 5.29                                     | 0.0036                                |
| 75                                  | 3.59                                    | 4.85                                     | 0.0055                                |
| 80                                  | 2.8                                     | 3.87                                     | 0.0169                                |
| 85                                  | 2.46                                    | 3.48                                     | 0.0248                                |
| 90                                  | 2.08                                    | 3.88                                     | 0.0105                                |

**Table 2.1.5. Actual and Synthetic Life Expectancy at 15 by Relative Year**

| <b>Year</b> | <b>Actual Life Expectancy</b> | <b>Synthetic Life Expectancy</b> | <b>P-values</b> |
|-------------|-------------------------------|----------------------------------|-----------------|
| -11         | 0.98212475                    | 0.98256481                       |                 |
| -10         | 0.98397434                    | 0.98376399                       |                 |
| -9          | 0.9868148                     | 0.9859013                        |                 |
| -8          | 0.98859364                    | 0.98832923                       |                 |
| -7          | 0.98988807                    | 0.98981071                       |                 |
| -6          | 0.9922573                     | 0.99107444                       |                 |
| -5          | 0.99428707                    | 0.9942196                        |                 |
| -4          | 0.99711174                    | 0.99956524                       |                 |
| -3          | 0.99858701                    | 1.0018227                        |                 |
| -2          | 0.99929887                    | 1.0014801                        |                 |
| -1          | 1                             | 1.0001334                        |                 |
| 1           | 1.00129                       | 0.99824494                       | 0.021767        |
| 2           | 1.0006196                     | 0.99519658                       | 0.04879         |
| 3           | 1.0021172                     | 0.98958212                       | 0.005158        |
| 4           | 1.0029415                     | 0.98158598                       | 0.000232        |
| 5           | 1.004455                      | 0.97667706                       | 0.000025        |
| 6           | 1.0060726                     | 0.97847444                       | 0.000036        |
| 7           | 1.0080941                     | 0.98313165                       | 0.000393        |
| 8           | 1.0111431                     | 0.98700225                       | 0.001885        |
| 9           | 1.0144066                     | 0.98802572                       | 0.002448        |
| 10          | 1.0171829                     | 0.98568207                       | 0.001216        |
| 11          | 1.0200438                     | 0.98319978                       | 0.000682        |
| 12          | 1.0234029                     | 0.98313767                       | 0.000676        |
| 13          | 1.0261114                     | 0.98351312                       | 0.000823        |
| 14          | 1.0292029                     | 0.98436987                       | 0.00091         |
| 15          | 1.0331285                     | 0.98694336                       | 0.001098        |
| 16          | 1.0374321                     | 0.9896962                        | 0.001151        |

## Robustness

The outcome variable for the benchmark model is adult life expectancy, exclusive of HIV mortality. This is because the primary focus of this study is non-communicable diseases and because development aid for HIV/AIDS has been substantial, potentially cloaking the policy shortcomings of autocratic regimes. For the sake of robustness we also ran the synthetic control analysis for adult life expectancy that incorporates mortality due to HIV. In order to accurately model HIV-included life expectancy, we narrowed the set of predictors to GDP per capita, female and male educational attainment, tropical climate, distance to nearest ice-free coastline, and domestic autonomy, but added age-standardized HIV prevalence.<sup>3</sup> The results of this robustness check are presented in Figure 2.1.1 A and B. In keeping with our baseline results, we find that democratic transitions are associated with an average improvement in life expectancy at 15 of 2.6% (p-value = 0.026) after 10 years, corresponding to an absolute difference of 0.026.

**Figure 2.1.1A: Average Effect of Democratic Transitions on Life Expectancy at 15**

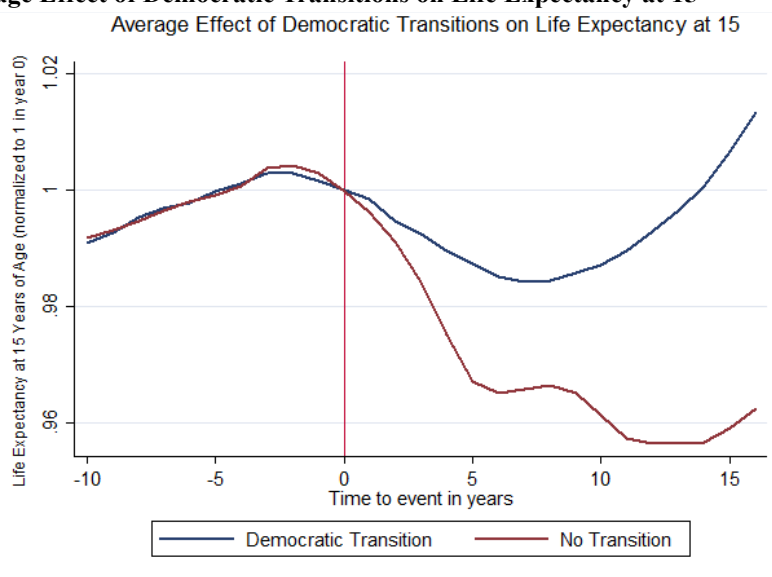

**Figure 2.1.1B: Empirical Test for Effect Significance (p-values)**

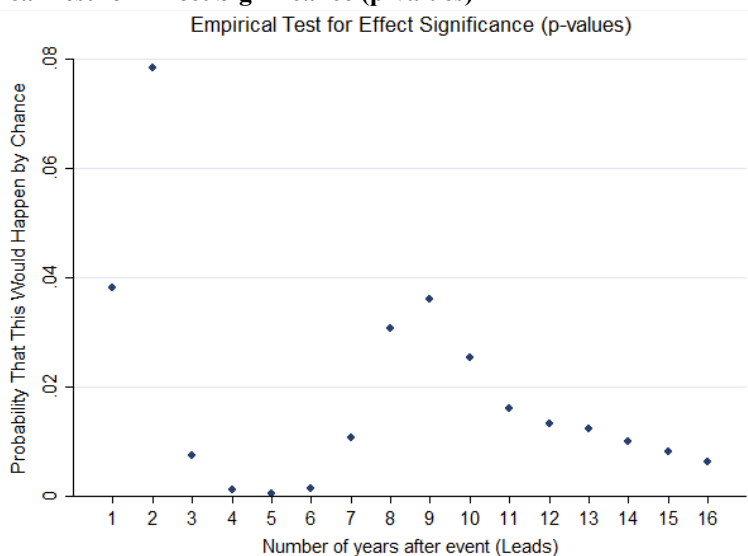

## Part 2.2: Shapely Variance Decomposition

We decompose the changes observed in mortality rates predictable from changes in determinants of health in order to understand the heterogeneous effects on cause-specific mortality of these determinants. We use the Shapely variance decomposition method in the relaimpo package (for R version 3.4.3) to quantify the relative importance of each variable.<sup>29</sup>

### R<sup>2</sup> as Explained Variance

We use R<sup>2</sup> to quantify explained variance. R<sup>2</sup>, or the coefficient of determination, calculates the fraction of variance in the outcome that can be predicted, or “explained” by the independent variables in a regression equation. We calculate R<sup>2</sup> in the usual way:<sup>30</sup>

$$SS_{total} = \sum_i (y_i - \bar{y})^2 \quad SS_{residual} = \sum_i (y_i - \hat{y}_i)^2 \quad R^2 = 1 - \frac{SS_{residual}}{SS_{total}}$$

Where there are  $i$  observations,  $\hat{y}$  is the predicted value from the regression equation, and  $\bar{y}$  is the average value of the outcome variable.  $SS_{total}$  is the total sum of squares, and  $SS_{residual}$  is the residual sum of squares. For example, we interpret an R<sup>2</sup> of 0.25 as explaining 25% of the variance in age-standardized mortality, leaving 75% of the changes in mortality unexplained by the predictors in the regression equation.

### Regression Equations

We complete two variance decomposition analyses. The first decomposes variance in all GBD Level Two causes, based on a panel of county-year observations. The regression equation is:

$$\begin{aligned} Death\ rate_{it} = & \beta_0 + \beta_1 (Democratic\ Stock_{it}) + \beta_2 \ln(GDP\ per\ capita_{it}) + \beta_3 \ln(urbanicity_{it}) \\ & + \beta_4 (Mortality\ Shock_{it}) + \beta_5 (DAH\ per\ capita_{it}) \\ & + \sum \tau_i 1(year) + \sum \delta_i 1(iso) + \epsilon_{it} \end{aligned}$$

The predictor variables are democratic stock, GDP per capita, urbanicity, DAH per capita, mortality shocks, and indicator variables for year. In order to assess within country variation, we de-mean all variables according to country means. The regression equation includes country indicators to express that marginal effects are “within country” effects, but we do not decompose the variance of the country effects.

The second decomposes variance in each year across countries in all GBD Level Two causes. The regression equation estimated for each year and cause is:

$$\begin{aligned} Death\ rate_i = & \beta_0 + \beta_1 (Democratic\ Stock_i) + \beta_2 \ln(GDP\ per\ capita_i) + \beta_3 \ln(urbanicity_i) \\ & + \beta_4 (Mortality\ Shock_i) + \beta_5 (DAH\ per\ capita_i) + \epsilon_i \end{aligned}$$

The predictor variables are the same as the first decomposition analysis, except there are no country- or year-fixed effects.

For each analysis, we used 170 countries, 1995 through 2016, to estimate the regression equations. We are restricted to starting the analysis at 1995 due to the variable DAH per capita.

### Intuition about Variance Decomposition

The decomposition estimates are a function of the estimated marginal effect, the observed variation in the independent variable, and the observed variation in the dependent variable. While the variation of the independent variable is the same across equations, the variation of the dependent variable changes (as well as the estimated marginal effects). An easy way to think about this is to imagine that the estimated marginal effect for two diseases is the same, but if the variation in the dependent variable is much larger for one of the two, then the share of the variation explained by the independent variable will differ. To apply this logic to sample cases, the marginal effect of democracy on HIV mortality is very large, but variation across time and countries in HIV mortality is enormous, so the decomposition shows a share of variation HIV mortality explained by democracy is really small. Alternatively, the marginal effect of democracy on cancer mortality is much smaller, but variation across time and countries in



cancer mortality is also relatively small, so the decomposition shows the share of the variation of cancer mortality explained by democracy is actually very large.

### Variance Decomposition Formulas

We use the Lindeman, Merenda, and Gold relative importance metric to partition  $R^2$  into the variance explained by each predictor.<sup>31</sup> Similar to Shapely's decomposition metric for allocation marginal product, this algorithm will consider all orderings of the regression list and the marginal contribution to  $R^2$  of each predictor. Specifically, for each ordering of the regression list, the relaimpo package performs stepwise regression, adding each variable one at a time, and calculating the  $R^2$  to attribute a change in  $R^2$  to that variable.<sup>29</sup> The relative importance proportions for each variable are averaged across orderings. Numerically, this algorithm is:

$$LMG(predictor) = \frac{1}{p!} \sum_{orderings} seq R^2((predictor) | ordering)$$

where  $seq R(predictor | previous variables in ordering) =$

$$R^2(predictor \cup previous variables in ordering) - R^2(previous variables in ordering)$$

where  $R^2(x)$  is shorthand to represent the  $R^2$  associated with a regression the outcome using  $x$  predictors.<sup>29</sup>

Figure 2 of the article ("Explained Changes in Mortality Due To Democracy and Other Determinants of Health") shows the proportion of variance in Global Burden of Disease Level Two cause-specific age-standardised mortality explained by democracy and other determinants of health. Here, we show below the proportion of variance of each variable included in this analysis.

**Table 2.2.1. Explained Changes in Mortality Due to Democracy and Other Determinants of Health: Proportions of Variance for Each Variable in our Analysis**

| <b>Disease</b>     | <b>Year</b> | <b>GDP per capita</b> | <b>Urbanicity</b> | <b>DAH per capita</b> | <b>Mortality Shock</b> | <b>Democracy</b> | <b>Total Explained by Model (R-squared)</b> |
|--------------------|-------------|-----------------------|-------------------|-----------------------|------------------------|------------------|---------------------------------------------|
| Cardiovascular     | 0.2613      | 0.1183                | 0.0413            | 0.0065                | 0.0005                 | 0.2227           | 0.6507                                      |
| Respiratory        | 0.2326      | 0.1879                | 0.0652            | 0.0043                | 0.0011                 | 0.0759           | 0.5669                                      |
| Cirrhosis          | 0.1075      | 0.0218                | 0.0698            | 0.0029                | 0.0022                 | 0.0614           | 0.2656                                      |
| Diabetes           | 0.0263      | 0.0071                | 0.0140            | 0.0064                | 0.0019                 | 0.0044           | 0.0603                                      |
| Cancer             | 0.0933      | 0.0607                | 0.0169            | 0.0112                | 0.0016                 | 0.0950           | 0.2787                                      |
| Diarrhea           | 0.2710      | 0.2374                | 0.1284            | 0.0083                | 0.0002                 | 0.0959           | 0.7413                                      |
| Digestive          | 0.2487      | 0.1700                | 0.1189            | 0.0059                | 0.0002                 | 0.0904           | 0.6341                                      |
| Forces             | 0.0123      | 0.0224                | 0.0063            | 0.0026                | 0.3963                 | 0.0043           | 0.4442                                      |
| Maternal           | 0.2266      | 0.1774                | 0.0982            | 0.0056                | 0.0004                 | 0.0656           | 0.5739                                      |
| Mental             | 0.0106      | 0.0258                | 0.0023            | 0.0004                | 0.0001                 | 0.0045           | 0.0436                                      |
| Musculoskeletal    | 0.0041      | 0.0006                | 0.0031            | 0.0004                | 0.0011                 | 0.0033           | 0.0125                                      |
| NTDs + Malaria     | 0.1429      | 0.0646                | 0.1042            | 0.0082                | 0.0001                 | 0.0418           | 0.3618                                      |
| Neurological       | 0.0113      | 0.0024                | 0.0259            | 0.0060                | 0.0001                 | 0.0317           | 0.0773                                      |
| Nutrition          | 0.1779      | 0.0886                | 0.0472            | 0.0047                | 0.0006                 | 0.0440           | 0.3630                                      |
| Other Communicable | 0.2188      | 0.1826                | 0.0942            | 0.0060                | 0.0008                 | 0.0864           | 0.5888                                      |
| Other NCDs         | 0.1576      | 0.0914                | 0.0289            | 0.0025                | 0.0006                 | 0.1268           | 0.4079                                      |
| Violence           | 0.0975      | 0.1250                | 0.0359            | 0.0072                | 0.0002                 | 0.0470           | 0.3127                                      |
| Transport          | 0.1745      | 0.0665                | 0.0261            | 0.0045                | 0.0004                 | 0.1778           | 0.4499                                      |
| Falls + Fire       | 0.2791      | 0.1881                | 0.0722            | 0.0050                | 0.0003                 | 0.1221           | 0.6669                                      |
| TB                 | 0.2725      | 0.1989                | 0.0835            | 0.0091                | 0.0011                 | 0.1653           | 0.7304                                      |
| HIV                | 0.0691      | 0.0097                | 0.0045            | 0.0004                | 0.0003                 | 0.0283           | 0.1124                                      |

**Table 2.2.2. Explained Changes in Mortality Due to Democracy Over Time: Proportions of Variance for Democracy, 1995 and 2015**

| <b>Disease</b>     | <b>Total R<sup>2</sup>, 1995</b> | <b>Total R<sup>2</sup>, 2015</b> | <b>Democr<br/>acy R<sup>2</sup>,<br/>1995</b> | <b>Democrac<br/>y R<sup>2</sup>, 2015</b> | <b>Share of R<sup>2</sup><br/>Attributable to<br/>Democracy, 1995</b> | <b>Share of R<sup>2</sup><br/>Attributable to<br/>Democracy, 2015</b> |
|--------------------|----------------------------------|----------------------------------|-----------------------------------------------|-------------------------------------------|-----------------------------------------------------------------------|-----------------------------------------------------------------------|
| Cardiovascular     | 0.2265                           | 0.5048                           | 0.1443                                        | 0.2523                                    | 0.6373                                                                | 0.4997                                                                |
| Respiratory        | 0.4075                           | 0.4347                           | 0.0472                                        | 0.0316                                    | 0.1159                                                                | 0.0728                                                                |
| Cirrhosis          | 0.4448                           | 0.4422                           | 0.1304                                        | 0.1378                                    | 0.2932                                                                | 0.3117                                                                |
| Diabetes           | 0.3334                           | 0.2978                           | 0.1446                                        | 0.1089                                    | 0.4337                                                                | 0.3656                                                                |
| Cancer             | 0.1557                           | 0.1436                           | 0.1120                                        | 0.0899                                    | 0.7195                                                                | 0.6259                                                                |
| Diarrhea           | 0.6791                           | 0.6207                           | 0.0979                                        | 0.0734                                    | 0.1442                                                                | 0.1183                                                                |
| Digestive          | 0.5771                           | 0.5724                           | 0.0521                                        | 0.0379                                    | 0.0903                                                                | 0.0662                                                                |
| Forces             | 0.5036                           | 0.4870                           | 0.0359                                        | 0.0627                                    | 0.0713                                                                | 0.1287                                                                |
| Maternal           | 0.7741                           | 0.7666                           | 0.1768                                        | 0.1100                                    | 0.2284                                                                | 0.1435                                                                |
| Mental             | 0.0323                           | 0.0730                           | 0.0080                                        | 0.0576                                    | 0.2492                                                                | 0.7887                                                                |
| Musculoskeletal    | 0.2096                           | 0.2500                           | 0.1557                                        | 0.2124                                    | 0.7429                                                                | 0.8497                                                                |
| NTDs + Malaria     | 0.6733                           | 0.6581                           | 0.1124                                        | 0.0934                                    | 0.1669                                                                | 0.1419                                                                |
| Neurological       | 0.1203                           | 0.0467                           | 0.0143                                        | 0.0021                                    | 0.1188                                                                | 0.0456                                                                |
| Nutrition          | 0.5187                           | 0.5314                           | 0.0668                                        | 0.0423                                    | 0.1288                                                                | 0.0796                                                                |
| Other Communicable | 0.6118                           | 0.6165                           | 0.1078                                        | 0.0832                                    | 0.1762                                                                | 0.1350                                                                |
| Other NCDs         | 0.3067                           | 0.4245                           | 0.1671                                        | 0.1404                                    | 0.5450                                                                | 0.3308                                                                |
| Violence           | 0.0415                           | 0.1428                           | 0.0096                                        | 0.0249                                    | 0.2313                                                                | 0.1741                                                                |
| Transport          | 0.2832                           | 0.4843                           | 0.2212                                        | 0.2812                                    | 0.7809                                                                | 0.5807                                                                |
| Falls + Fire       | 0.6246                           | 0.6349                           | 0.1233                                        | 0.0666                                    | 0.1975                                                                | 0.1049                                                                |
| TB                 | 0.705                            | 0.7321                           | 0.1925                                        | 0.1750                                    | 0.2709                                                                | 0.2391                                                                |
| HIV                | 0.2120                           | 0.4271                           | 0.0168                                        | 0.0471                                    | 0.0791                                                                | 0.1103                                                                |

**Table 2.2.3. Explained Changes in Mortality Due to Democracy and Other Determinants of Health: Proportions of Variance for Cardiovascular Disease, 1995-2015**

| Year | GDP per capita | Urbanicity | DAH per capita | Mortality Shock | Democracy | Total Explained by Model (R-squared) | Share of R-squared Attributable to Democracy |
|------|----------------|------------|----------------|-----------------|-----------|--------------------------------------|----------------------------------------------|
| 1995 | 0.0525         | 0.0271     | 0.0007         | 0.0019          | 0.1443    | 0.2265                               | 0.6373                                       |
| 1996 | 0.0624         | 0.0321     | 0.0097         | 0.0088          | 0.1644    | 0.2773                               | 0.5927                                       |
| 1997 | 0.0669         | 0.0386     | 0.0191         | 0.0020          | 0.1726    | 0.2991                               | 0.5769                                       |
| 1998 | 0.0688         | 0.0413     | 0.0034         | 0.0092          | 0.1756    | 0.2983                               | 0.5888                                       |
| 1999 | 0.0727         | 0.0455     | 0.0030         | 0.0065          | 0.1786    | 0.3064                               | 0.5830                                       |
| 2000 | 0.0764         | 0.0507     | 0.0059         | 0.0058          | 0.1884    | 0.3272                               | 0.5757                                       |
| 2001 | 0.0746         | 0.0515     | 0.0068         | 0.0073          | 0.1910    | 0.3312                               | 0.5766                                       |
| 2002 | 0.0787         | 0.0542     | 0.0090         | 0.0057          | 0.2003    | 0.3479                               | 0.5756                                       |
| 2003 | 0.0795         | 0.0552     | 0.0113         | 0.0050          | 0.2106    | 0.3616                               | 0.5823                                       |
| 2004 | 0.0800         | 0.0557     | 0.0226         | 0.0025          | 0.2205    | 0.3814                               | 0.5782                                       |
| 2005 | 0.0763         | 0.0555     | 0.0426         | 0.0057          | 0.2224    | 0.4025                               | 0.5525                                       |
| 2006 | 0.0797         | 0.0588     | 0.0332         | 0.0052          | 0.2311    | 0.4080                               | 0.5664                                       |
| 2007 | 0.0820         | 0.0599     | 0.0362         | 0.0093          | 0.2351    | 0.4223                               | 0.5567                                       |
| 2008 | 0.0952         | 0.0699     | 0.0137         | 0.0048          | 0.2478    | 0.4315                               | 0.5744                                       |
| 2009 | 0.1013         | 0.0715     | 0.0220         | 0.0116          | 0.2474    | 0.4537                               | 0.5453                                       |
| 2010 | 0.1103         | 0.0742     | 0.0349         | 0.0173          | 0.2567    | 0.4933                               | 0.5204                                       |
| 2011 | 0.1117         | 0.0773     | 0.0335         | 0.0076          | 0.2584    | 0.4885                               | 0.5289                                       |
| 2012 | 0.1145         | 0.0791     | 0.0287         | 0.0087          | 0.2525    | 0.4835                               | 0.5223                                       |
| 2013 | 0.1221         | 0.0834     | 0.0292         | 0.0045          | 0.2619    | 0.5011                               | 0.5226                                       |
| 2014 | 0.1291         | 0.0885     | 0.0175         | 0.0111          | 0.2582    | 0.5045                               | 0.5119                                       |
| 2015 | 0.1331         | 0.0883     | 0.0133         | 0.0179          | 0.2523    | 0.5048                               | 0.4997                                       |

### Part 2.3: Structural Equation Model

To examine the mediating factors of democracy on health, we estimated a structural equation model (SEM). SEMs allow estimation of the direct effect of variables on outcomes, as performed in typical OLS settings. Additionally, SEMs allow estimation of indirect effects of variables through mediating factors, which then also influence the outcome. For example, we might expect that democracy influences health outcomes directly by increasing media transparency, which can report on quality of health services. However, democracy might also indirectly influence health outcomes through increased government health expenditure, wherein democracies increase spending, and that spending improves health outcomes.

We estimate a long difference specification using Stata's `--sem--` command, differencing our variables over 20 years (1995 - 2015) due to the scale of time at which these changes and impacts may occur. Although this reduces the amount of data available to identify the effect of democracy, it captures long-term political, economic, and epidemiological shifts. As is common in difference modeling, and to capture different initial conditions in epidemiology in 1995, we also include a convergence term for the change in mortality rates.<sup>32</sup> A convergence term model makes the first derivative a function of the initial level, so we model changes in mortality rate as a function of the initial level of country mortality in 1995.

For each Level Two cause, we estimate an SEM of the form:

$$\begin{aligned} \Delta(\text{Government Health Expenditure as Source}_{it}) &= \beta_{10} + \beta_{11}\Delta(\text{Democratic Stock}_{it}) + \varepsilon_{it} \\ \% \Delta(\text{Urbanicity}_{it}) &= \beta_{20} + \beta_{21}\Delta(\text{Democratic Stock}_{it}) + \varepsilon_{it} \\ \% \Delta(\text{GDP per capita}_{it}) &= \beta_{30} + \beta_{31}\Delta(\text{Democratic Stock}_{it}) + \varepsilon_{it} \\ \% \Delta(\text{Death Rate}_{it}) &= \beta_{40} + \beta_{41}\Delta(\text{Democratic Stock}_{it}) + \\ &\quad \beta_{42}\Delta(\text{Government Health Expenditure as Source}_{it}) + \\ &\quad \beta_{43}\% \Delta(\text{Urbanicity}_{it}) \\ &\quad \beta_{44}\% \Delta(\text{GDP per capita}_{it}) \\ &\quad \beta_{45}\Delta(\text{Skilled Birth Attendance}_{it}) + \\ &\quad \beta_{46}\Delta(\text{Maternal Education}_{it}) + \\ &\quad \beta_{47}\Delta(\text{Obesity Prevalence}_{it}) + \\ &\quad \beta_{48}\text{Death Rate}_{it} + \varepsilon_{it} \end{aligned}$$

Where  $i$  is country,  $t$  is year, and  $\Delta$  denotes difference over 20 years. For this analysis, we used data from 165 countries, observing data from 1995 and 2015, and taking the difference. Five countries were dropped from the analysis due to missing data in recent years.

Note that some variables are modeled as absolute changes and others are modeled as percent changes. The most important instance of this is government health expenditure as source (in absolute changes) and GDP per capita (in percent changes). If we modeled both GDP per capita and GHES per capita in absolute changes, then GHES per capita is clearly in the causal pathway (as the amount of GDP per capita has a strong relationship to the absolute amount of health resources sourced from the government). If we modeled both GDP per capita and GHES per capita in percent changes, then GHES per capita is clearly in the causal pathway (as the percent growth in GHES is often correlated with the percent growth in GDP per capita). The percent change in GDP per capita models the economic growth of the country, which slightly informs the dollar change in GHES per capita, but not as directly. For instance, two countries could have the same percent economic growth, but very different resources per person for health.

**Figure 2.3.1: Absolute and Percent Changes in GDP and GHES**

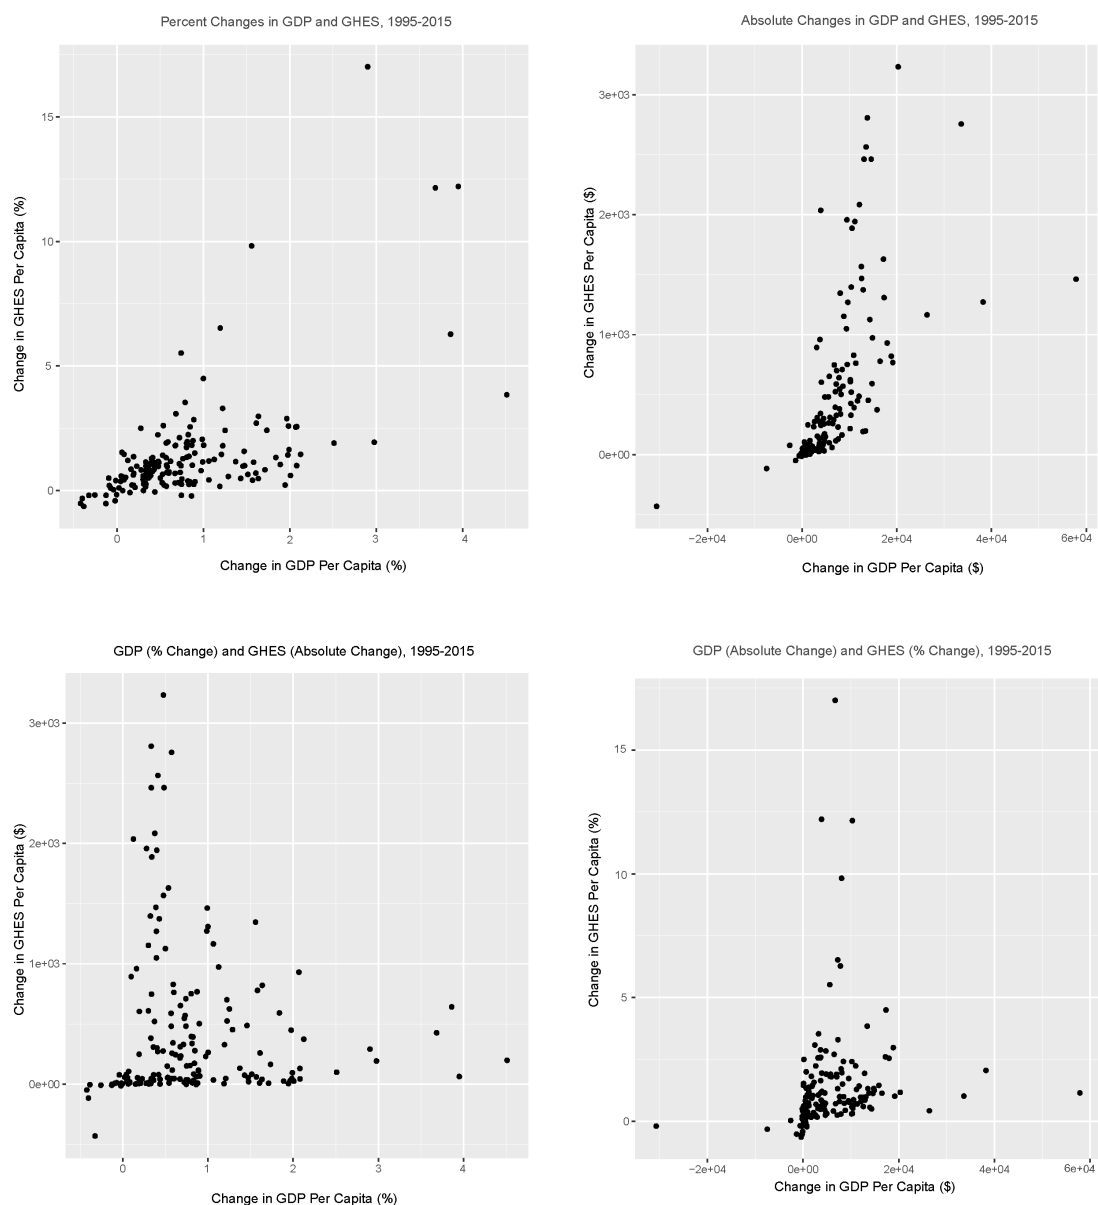

In our model, we aimed to investigate the direct and indirect effects of democracy on health. Thus Figure 4 displays the direct and indirect effects of democracy on health. It is important to note that we display the indirect effect of GDP through democracy on health, where we consider how democracy drives economic development as a percent change which influences health. This model does not display the effect of overall levels of development, because GDP per capita does not enter the model as a level. Figure 2.3.3 considers how fixed geographic attributes (such as past, initial levels of economic development) affect our results.

The following tables displays how to calculate direct and indirect effects:

**Table 2.3.1: Direct and Indirect Effects Calculations**

| Description of Effect                                                                                                   | Calculation                                                                                |
|-------------------------------------------------------------------------------------------------------------------------|--------------------------------------------------------------------------------------------|
| Direct effect of changes in democratic stock on changes in age-standardized death rates                                 | $\beta_{41}$                                                                               |
| Indirect effect of changes in democratic stock on changes in age-standardized death rates                               | $\beta_{42} * \beta_{11} + \beta_{43} * \beta_{21} + \beta_{44} * \beta_{31}$              |
| Effect of changes in GDP per capita attributable to democratic stock on changes in age-standardized death rates         | $\beta_{44} * \beta_{31}$                                                                  |
| Effect of changes in urbanization attributable to democratic stock on changes in age-standardized death rates           | $\beta_{43} * \beta_{21}$                                                                  |
| Effect of changes in government health expenditure attributable to democracy on changes in age-standardized death rates | $\beta_{42} * \beta_{11}$                                                                  |
| Total effect of democratic stock on age-standardized death rates                                                        | $\beta_{41} + \beta_{42} * \beta_{11} + \beta_{43} * \beta_{21} + \beta_{44} * \beta_{31}$ |

**Figure 2.3.2: Path Diagram of Structural Equation Model**

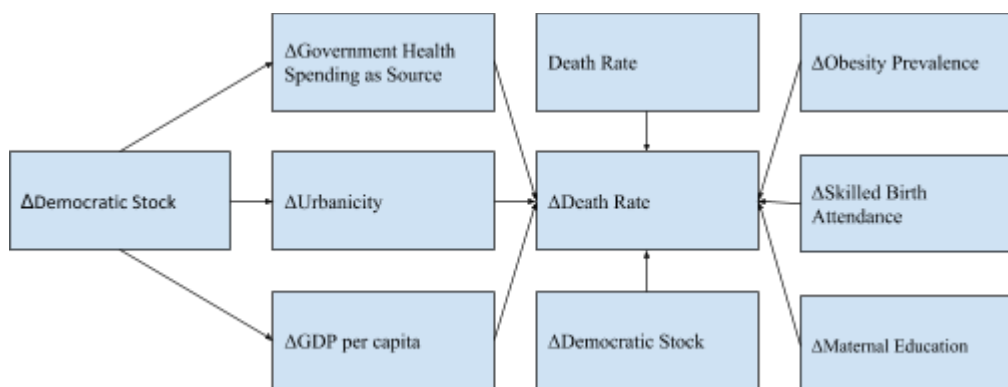

Finally, to address concerns about omitted variable bias due to geography, we also run the model presented in Figure 2.3.2 with fixed effects for GBD super region. Full convergence was not achieved in the maximum likelihood estimation due to a very low (1e-12) tolerance on step size, and so standard errors and p-values should be interpreted with caution. However, the point estimates and effect directions remain very similar controlling for geography, as shown in Figure 2.3.3.

**Figure 2.3.3: Structural Equation Model with Geography Fixed Effects**

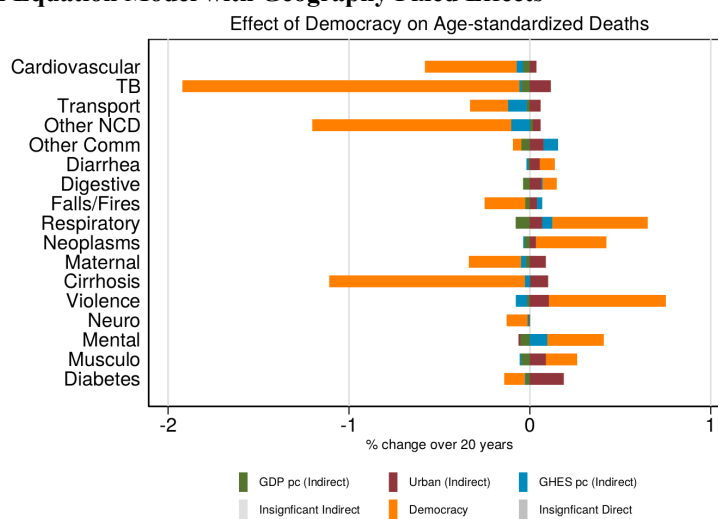

**Table 2.3.4: Direct, Indirect, and Total Effects of Democracy**

Note: All tables first report coefficient estimates followed by the associated standard errors in brackets.

**Panel A: Direct and Indirect Effects of a One-Point Increase in Democracy, 1995-2015**

| Disease            | Dem on Mortality (Indirect) |            | Dem on Mortality (Direct) |            | GDP on Mortality (Direct) |            | GHES on Mortality (Direct) |            | Urban on Mortality (Direct) |            |
|--------------------|-----------------------------|------------|---------------------------|------------|---------------------------|------------|----------------------------|------------|-----------------------------|------------|
|                    |                             |            |                           |            |                           |            |                            |            |                             |            |
| Cardiovascular     | -1.02138                    | [0.20574]  | -0.95344                  | [0.296149] | -0.00041                  | [0.000174] | -0.01272                   | [0.002378] | 0.011592                    | [0.047168] |
| Cirrhosis          | -0.29639                    | [0.275637] | -0.9213                   | [0.464464] | 0.00026                   | [0.000278] | -0.01163                   | [0.003708] | -0.20779                    | [0.076759] |
| Diabetes           | -0.24226                    | [0.302235] | 0.125634                  | [0.554344] | -0.00029                  | [0.000332] | -0.00789                   | [0.004327] | -0.26338                    | [0.092466] |
| Diarrhea           | 0.476521                    | [0.242042] | 0.388584                  | [0.413362] | -0.00042                  | [0.000245] | 0.008883                   | [0.00324]  | -0.07563                    | [0.071739] |
| Digestive          | -0.17821                    | [0.199347] | 0.177081                  | [0.360502] | -0.00048                  | [0.000217] | -0.00121                   | [0.002863] | -0.08512                    | [0.062934] |
| Falls + Fire       | -0.20832                    | [0.182383] | -0.28418                  | [0.306297] | -0.00059                  | [0.000183] | 0.002316                   | [0.002524] | 0.047007                    | [0.052523] |
| Forces             | -66.6775                    | [332.627]  | -926.437                  | [747.6024] | -0.26925                  | [0.446559] | 2.165471                   | [5.684914] | 48.57401                    | [125.2874] |
| HIV                | -19.3119                    | [14.35116] | 17.53766                  | [31.3693]  | 0.001747                  | [0.01887]  | -0.2224                    | [0.240887] | 3.995548                    | [5.233673] |
| Maternal           | 0.410921                    | [0.371604] | 0.697381                  | [0.699874] | -0.00068                  | [0.000412] | 0.009334                   | [0.005325] | -0.09846                    | [0.120401] |
| Mental             | 0.302603                    | [0.399291] | -0.14668                  | [0.862805] | -0.00061                  | [0.000522] | 0.008857                   | [0.006633] | -0.02408                    | [0.142581] |
| Musculoskeletal    | -0.28587                    | [0.348801] | 1.141641                  | [0.734281] | -0.00049                  | [0.000437] | -0.00526                   | [0.005813] | -0.18775                    | [0.118621] |
| Cancer             | -0.44182                    | [0.126183] | 0.106601                  | [0.235479] | -0.00038                  | [0.000139] | -0.00432                   | [0.001773] | -0.01114                    | [0.038321] |
| Neurological       | -0.07470                    | [0.067797] | -0.2462                   | [0.138605] | -8.6E-05                  | [8.31E-05] | 0.000262                   | [0.001141] | 0.032828                    | [0.022683] |
| NTDs               | 1.17680                     | [0.974397] | 0.02245                   | [1.883469] | 0.002564                  | [0.001124] | -0.01042                   | [0.014419] | -0.39357                    | [0.319717] |
| Nutrition          | 0.823128                    | [0.52906]  | 1.486886                  | [1.054301] | -0.00083                  | [0.000627] | 0.018437                   | [0.008001] | -0.03649                    | [0.173364] |
| Other communicable | 0.397233                    | [0.282426] | 0.139497                  | [0.497879] | -0.0007                   | [0.000295] | 0.010005                   | [0.003816] | -0.0676                     | [0.083032] |
| Other NCDs         | -1.0441                     | [0.277265] | -0.82852                  | [0.477628] | -2.2E-05                  | [0.000281] | -0.0153                    | [0.003625] | 0.041992                    | [0.078568] |
| Respiratory        | -0.11095                    | [0.248925] | 0.365276                  | [0.382518] | -0.00113                  | [0.000227] | 0.0058                     | [0.002921] | -0.04502                    | [0.064115] |
| TB                 | -0.61776                    | [0.352689] | -1.21159                  | [0.686812] | -0.00083                  | [0.000405] | -0.00634                   | [0.005187] | -0.1207                     | [0.119861] |
| Transport          | -1.35564                    | [0.310445] | -0.5913                   | [0.488937] | -0.00035                  | [0.000289] | -0.01885                   | [0.003722] | -0.0047                     | [0.080738] |
| Violence           | -0.66429                    | [0.2396]   | 0.770298                  | [0.455255] | -0.00049                  | [0.00027]  | -0.00904                   | [0.003501] | -0.09534                    | [0.073778] |



**Panel B: Direct Effects of Democracy on GDP per capita, GHES, and urbanicity**

| Effect                      | Effect Size     |
|-----------------------------|-----------------|
| Democracy on GDP per capita | 483.59 [146.00] |
| Democracy on Urbancity      | -1.52 [0.49]    |
| Democracy on GHES           | 63.37 [11.44]   |

**Panel C: Total Effects of Democracy on Mortality**

| Disease            | Dem on Mortality (Total) |             |
|--------------------|--------------------------|-------------|
| Cardiovascular     | -1.97481                 | [0.340838]  |
| Cirrhosis          | -1.21769                 | [0.4909079] |
| Diabetes           | -0.11662                 | [0.5720934] |
| Diarrhea           | 0.865104                 | [0.4503594] |
| Digestive          | -0.00113                 | [0.3753386] |
| Falls + Fire       | -0.4925                  | [0.330689]  |
| Forces             | -993.114                 | [730.2446]  |
| HIV                | -1.77422                 | [30.62824]  |
| Maternal           | 1.108302                 | [0.7482914] |
| Mental             | 0.155927                 | [0.8428793] |
| Musculoskeletal    | 0.855772                 | [0.7436509] |
| Cancer             | -0.33522                 | [0.2420971] |
| Neurological       | -0.3209                  | [0.1334275] |
| NTDs               | 1.199245                 | [1.937382]  |
| Nutrition          | 2.310014                 | [1.073083]  |
| Other communicable | 0.53673                  | [0.5348423] |
| Other NCDs         | -1.87263                 | [0.5100099] |
| Respiratory        | 0.254325                 | [0.4203205] |

|           |          |             |
|-----------|----------|-------------|
| TB        | -1.82935 | [0.7158226] |
| Transport | -1.94695 | [0.5328746] |
| Violence  | 0.106013 | [0.4531403] |

**Table 2.3.5: Correlations Between Democratic Experience and GDP Per Capita, Government Health Expenditure, and Cardiovascular Mortality by Income Group**

*Note: these tables display Pearson correlation coefficients and associated p-values in brackets*

**Panel A: High-income countries**

|                 | Democracy        | GDP per capita   | GHEs per capita  | Cardio Deaths |
|-----------------|------------------|------------------|------------------|---------------|
| Democracy       | 1                |                  |                  |               |
| GDP per capita  | 0.3722 [0.0084]  | 1                |                  |               |
| GHEs per capita | 0.0855 [0.5593]  | -0.0650 [0.6537] | 1                |               |
| Cardio Deaths   | -0.3392 [0.0171] | -0.1239 [0.3913] | -0.3598 [0.0103] | 1             |

**Panel B: Upper-middle Income Countries**

|                 | Democracy        | GDP per capita   | GHEs per capita  | Cardio Deaths |
|-----------------|------------------|------------------|------------------|---------------|
| Democracy       | 1                |                  |                  |               |
| GDP per capita  | -0.3738 [0.0148] | 1                |                  |               |
| GHEs per capita | 0.0114 [0.9430]  | 0.2208 [0.1403]  | 1                |               |
| Cardio Deaths   | -0.0798 [0.6152] | -0.3364 [0.0223] | -0.2421 [0.1051] | 1             |

**Panel C: Lower-middle Income Countries**

|                 | Democracy        | GDP per capita   | GHEs per capita  | Cardio Deaths |
|-----------------|------------------|------------------|------------------|---------------|
| Democracy       | 1                |                  |                  |               |
| GDP per capita  | -0.0964 [0.5240] | 1                |                  |               |
| GHEs per capita | 0.1379 [0.3607]  | 0.2208 [0.1403]  | 1                |               |
| Cardio Deaths   | 0.1745 [0.2461]  | -0.3364 [0.0223] | -0.2421 [0.1051] | 1             |

**Panel D: Low-income Countries**

|                 | Democracy       | GDP per capita   | GHEs per capita  | Cardio Deaths |
|-----------------|-----------------|------------------|------------------|---------------|
| Democracy       | 1               |                  |                  |               |
| GDP per capita  | 0.1470 [0.4383] | 1                |                  |               |
| GHEs per capita | 0.1578 [0.4049] | 0.4704 [0.0087]  | 1                |               |
| Cardio Deaths   | 0.1294 [0.4956] | -0.2984 [0.1092] | -0.2095 [0.2666] | 1             |

### Part 2.4: Leave-one-out Analysis

We conduct a “leave-one-out” analysis to examine the impact of each of five components of democracy in reducing cause-specific age-standardized death rates. The “leave-one-out” analysis is termed such because it calculates the Multiplicative Polyarchy Index systematically leaving out one component of democracy, such that we have six democratic stock indices:

- 1) Democracy
- 2) Democracy Excluding Suffrage
- 3) Democracy Excluding Free and Fair Elections
- 4) Democracy Excluding Free Expression
- 5) Democracy Excluding Free Association
- 6) Democracy Excluding Elected Executive

We look at the impact of the stock version of each component by estimating the effect of democratic stock on cause-specific age-standardized mortality rates for each Level Two cause in the following regression framework:

$$\begin{aligned} Death\ rate_{it} = & \beta_0 + \beta_1 (Democratic\ Stock_{it}) + \beta_2 \ln(GDP\ per\ capita_{it}) \\ & + \beta_3 \ln(Urbanicity_{it}) + \beta_4 (Mortality\ Shock_{it}) + \beta_5 (DAH\ per\ capita_{it}) \\ & + \sum \tau_l 1(year) + \sum \delta_l 1(iso) + \epsilon_{it} \end{aligned}$$

Where there are  $i$  countries and  $t$  years. The Democratic Stock variable can be one of six versions listed above. We use Stata’s --xtreg-- command to estimate a fixed effects specification with robust standard errors. Our panel data are at the country-year level. We calculate 99% confidence intervals by multiplying the standard error from the regression by 2.58.

To address concerns about omitted variables due to time, we tested both linear year trends and time dummies. All results below use time dummies due to the less stringent assumption on the trend of time.

We include the regressions results of all Level Two causes and HIV and tuberculosis for the leave-one-out analysis below. Column numbers refer to the democratic stock calculation above used as the outcome.

**Table 2.4.1: Leave-one-out Analysis Results for All Level Two Causes, HIV, and Tuberculosis and the Sub-components of Democracy**

#### HIV

|                                   | (1)        | (2)       | (3)       | (4)        | (5) | (6) |
|-----------------------------------|------------|-----------|-----------|------------|-----|-----|
| All components included           | -0.0730*** |           |           |            |     |     |
|                                   | (0.02541)  |           |           |            |     |     |
| Excluding free and fair elections |            | -0.0432*  |           |            |     |     |
|                                   |            | (0.02271) |           |            |     |     |
| Excluding free expression         |            |           | -0.0586** |            |     |     |
|                                   |            |           | (0.02310) |            |     |     |
| Excluding free association        |            |           |           | -0.0638*** |     |     |
|                                   |            |           |           | (0.02309)  |     |     |

|                             |           |           |           |           |            |            |
|-----------------------------|-----------|-----------|-----------|-----------|------------|------------|
| Excluding suffrage          |           |           |           |           | -0.0670*** |            |
|                             |           |           |           |           | (0.02483)  |            |
| Excluding elected officials |           |           |           |           |            | -0.0720*** |
|                             |           |           |           |           |            | (0.02455)  |
| GDP per capita (ln)         | 0.3205**  | 0.3426**  | 0.3404**  | 0.3305**  | 0.3335**   | 0.3295**   |
|                             | (0.16173) | (0.16638) | (0.16073) | (0.16053) | (0.16121)  | (0.16026)  |
| Urbanicity (ln)             | -0.1292   | -0.0905   | -0.1242   | -0.1370   | -0.1269    | -0.1231    |
|                             | (0.14532) | (0.14935) | (0.14453) | (0.14184) | (0.14436)  | (0.14625)  |
| Mortality shock             | -0.0004   | -0.0012   | -0.0003   | -0.0003   | -0.0005    | -0.0004    |
|                             | (0.00058) | (0.00354) | (0.00342) | (0.00340) | (0.00340)  | (0.00338)  |
| DAH per capita              | -0.0005   | -0.00006  | -0.0003   | -0.0005   | -0.0005    | -0.0005    |
|                             | (0.00096) | (0.00103) | (0.00098) | (0.00097) | (0.00097)  | (0.00097)  |
| Constant                    | -0.7463   | -1.091    | -0.9456   | -0.7621   | -0.8784    | -0.7629    |
|                             | (1.59878) | (1.70015) | (1.58434) | (1.59384) | (1.59342)  | (1.57878)  |
| Observations                | 3280      | 3280      | 3280      | 3280      | 3280       | 3280       |
| Countries                   | 164       | 164       | 164       | 164       | 164        | 164        |
| Country fixed effects       | YES       | YES       | YES       | YES       | YES        | YES        |
| Year fixed effects          | YES       | YES       | YES       | YES       | YES        | YES        |

Notes: Cluster-robust standard errors reported in parentheses. \*  $p < 0.10$  \*\*  $p < 0.05$  \*\*\*  $p < 0.01$  \*\*\*\*  $p < 0.001$

### Tuberculosis

|                                   | (1)        | (2)       | (3)        | (4) | (5) | (6) |
|-----------------------------------|------------|-----------|------------|-----|-----|-----|
| All components included           | -0.0282*** |           |            |     |     |     |
|                                   | (0.00909)  |           |            |     |     |     |
| Excluding free and fair elections |            | -0.0107   |            |     |     |     |
|                                   |            | (0.00954) |            |     |     |     |
| Excluding free expression         |            |           | -0.0239*** |     |     |     |
|                                   |            |           | (0.00890)  |     |     |     |

|                             |             |             |             |             |             |             |
|-----------------------------|-------------|-------------|-------------|-------------|-------------|-------------|
| Excluding free association  |             |             |             | -0.0263***  |             |             |
|                             |             |             |             | (0.00844)   |             |             |
| Excluding suffrage          |             |             |             |             | -0.0273***  |             |
|                             |             |             |             |             | (0.00896)   |             |
| Excluding elected officials |             |             |             |             |             | -0.0286***  |
|                             |             |             |             |             |             | (0.0091)    |
| GDP per capita (ln)         | -0.4182**** | -0.4038**** | -0.4115**** | -0.4157**** | -0.4144**** | -0.4154**** |
|                             | (0.06612)   | (0.06855)   | (0.06657)   | (0.06613)   | (0.06614)   | (0.06595)   |
| Urbanicity (ln)             | 0.1300      | 0.1444      | 0.1312      | 0.1259      | 0.1301      | 0.1320      |
|                             | (0.09145)   | (0.10652)   | (0.09345)   | (0.09109)   | (0.00114)   | (0.09177)   |
| Mortality shock             | -0.0008     | -0.0013     | -0.0009     | -0.0008     | -0.0009     | -0.0008     |
|                             | (0.00115)   | (0.00119)   | (0.00116)   | (0.00113)   | (0.00115)   | (0.00114)   |
| DAH per capita              | 0.0027***   | 0.0029***   | 0.0028***   | 0.0027***   | 0.0027***   | 0.0027***   |
|                             | (0.00086)   | (0.00091)   | (0.00087)   | (0.00086)   | (0.0086)    | (0.00085)   |
| Constant                    | 6.0470****  | 5.7576****  | 5.9983****  | 6.0784****  | 6.0262****  | 6.0577****  |
|                             | (0.65529)   | (0.71735)   | (0.6653)    | (0.65713)   | (0.65484)   | (0.65305)   |
| Observations                | 3280        | 3280        | 3280        | 3280        | 3280        | 3280        |
| Countries                   | 164         | 164         | 164         | 164         | 164         | 164         |
| Country fixed effects       | YES         | YES         | YES         | YES         | YES         | YES         |
| Year fixed effects          | YES         | YES         | YES         | YES         | YES         | YES         |

Notes: Cluster-robust standard errors reported in parentheses. \*  $p < 0.10$  \*\*  $p < 0.05$  \*\*\*  $p < 0.01$  \*\*\*\*  $p < 0.001$

#### I. Communicable

##### Diarrhea, Lower Respiratory, and Other Common Infectious Diseases

|                                   | (1)       | (2)    | (3) | (4) | (5) | (6) |
|-----------------------------------|-----------|--------|-----|-----|-----|-----|
| All components included           | 0.0121*   |        |     |     |     |     |
|                                   | (0.00650) |        |     |     |     |     |
| Excluding free and fair elections |           | 0.0064 |     |     |     |     |

|                             |             |             |             |             |             |             |
|-----------------------------|-------------|-------------|-------------|-------------|-------------|-------------|
|                             |             | (0.00672)   |             |             |             |             |
| Excluding free expression   |             |             | 0.0108*     |             |             |             |
|                             |             |             | (0.00587)   |             |             |             |
| Excluding free association  |             |             |             | 0.0118**    |             |             |
|                             |             |             |             | (0.00571)   |             |             |
| Excluding suffrage          |             |             |             |             | 0.0119**    |             |
|                             |             |             |             |             | (0.00635)   |             |
| Excluding elected officials |             |             |             |             |             | 0.0118**    |
|                             |             |             |             |             |             | (0.00632)   |
| GDP per capita (ln)         | -0.2999**** | -0.3043**** | -0.3023**** | -0.3004**** | -0.3014**** | -0.3015**** |
|                             | (0.03845)   | (0.03980)   | (0.03851)   | (0.0382)    | (0.03841)   | (0.03849)   |
| Urbanicity (ln)             | -0.0306     | -0.0370     | -0.0309     | -0.0285     | -0.0306     | -0.0317     |
|                             | (0.12553)   | (0.13144)   | (0.12573)   | (0.12562)   | (0.12568)   | (0.12588)   |
| Mortality shock             | 0.0002      | 0.0004      | 0.0002      | 0.0002      | 0.0002      | 0.0002      |
|                             | (0.00076)   | (0.00076)   | (0.00076)   | (0.00074)   | (0.00076)   | (0.00076)   |
| DAH per capita              | -0.0002     | -0.0002     | -0.0002     | -0.0002     | -0.0002     | -0.0002     |
|                             | (0.00024)   | (0.00025)   | (0.00024)   | (0.0002)    | (0.00024)   | (0.00024)   |
| Constant                    | 6.5441****  | 6.6215****  | 6.5521****  | 6.518****   | 6.5496****  | 6.547****   |
|                             | (0.39437)   | (0.42536)   | (0.3968)    | (0.39186)   | (0.39383)   | (0.039508)  |
| Observations                | 3280        | 3280        | 3280        | 3280        | 3280        | 3280        |
| Countries                   | 164         | 164         | 164         | 164         | 164         | 164         |
| Country fixed effects       | YES         | YES         | YES         | YES         | YES         | YES         |
| Year fixed effects          | YES         | YES         | YES         | YES         | YES         | YES         |

Notes: Cluster-robust standard errors reported in parentheses. \*  $p < 0.10$  \*\*  $p < 0.05$  \*\*\*  $p < 0.01$  \*\*\*\*  $p < 0.001$

### Neglected Tropical Diseases and Malaria

|                         | (1)      | (2) | (3) | (4) | (5) | (6) |
|-------------------------|----------|-----|-----|-----|-----|-----|
| All components included | 0.0244** |     |     |     |     |     |

|                                   |           |           |           |           |           |           |
|-----------------------------------|-----------|-----------|-----------|-----------|-----------|-----------|
|                                   | (0.01034) |           |           |           |           |           |
| Excluding free and fair elections |           | 0.0234**  |           |           |           |           |
|                                   |           | (0.01015) |           |           |           |           |
| Excluding free expression         |           |           | 0.0231**  |           |           |           |
|                                   |           |           | (0.00989) |           |           |           |
| Excluding free association        |           |           |           | 0.0207**  |           |           |
|                                   |           |           |           | (0.00928) |           |           |
| Excluding suffrage                |           |           |           |           | 0.0231**  |           |
|                                   |           |           |           |           | (0.01035) |           |
| Excluding elected officials       |           |           |           |           |           | 0.0202*   |
|                                   |           |           |           |           |           | (0.01027) |
| GDP per capita (ln)               | -0.0888   | -0.0872   | -0.0927   | -0.0927   | -0.0926   | -0.0948   |
|                                   | (0.09129) | (0.09070) | (0.09166) | (0.09128) | (0.09154) | (0.09221) |
| Urbanicity (ln)                   | -0.0236   | -0.0373   | -0.234    | -0.0214   | -0.0241   | -0.0272   |
|                                   | (0.10575) | (0.10786) | (0.10489) | (0.10836) | (0.10690) | (0.11012) |
| Mortality shock                   | -0.0002   | -0.0008   | -0.0002   | -0.0002   | -0.0001   | -0.00007  |
|                                   | (0.00176) | (0.00104) | (0.00176) | (0.00176) | (0.00176) | (0.00176) |
| DAH per capita                    | -0.0015   | -0.0017   | -0.0016   | -0.0015   | -0.0015   | -0.0016   |
|                                   | (0.00100) | (0.00104) | (0.00100) | (0.00100) | (0.00100) | (0.0010)  |
| Constant                          | 0.2826    | 0.1602    | 0.2716    | 0.3039    | 0.3133    | 0.3679    |
|                                   | (0.84423) | (0.85387) | (0.84810) | (0.83795) | (0.84460) | (0.85388) |
| Observations                      | 3280      | 3280      | 3280      | 3280      | 3280      | 3280      |
| Countries                         | 164       | 164       | 164       | 164       | 164       | 164       |
| Country fixed effects             | YES       | YES       | YES       | YES       | YES       | YES       |
| Year fixed effects                | YES       | YES       | YES       | YES       | YES       | YES       |

Notes: Cluster-robust standard errors reported in parentheses. \*  $p < 0.10$  \*\*  $p < 0.05$  \*\*\*  $p < 0.01$  \*\*\*\*  $p < 0.001$

## Maternal Disorders

|                                   | (1)         | (2)         | (3)         | (4)         | (5)         | (6)         |
|-----------------------------------|-------------|-------------|-------------|-------------|-------------|-------------|
| All components included           | 0.0311***   |             |             |             |             |             |
|                                   | (0.01089)   |             |             |             |             |             |
| Excluding free and fair elections |             | 0.0324***   |             |             |             |             |
|                                   |             | (0.01006)   |             |             |             |             |
| Excluding free expression         |             |             | 0.0273***   |             |             |             |
|                                   |             |             | (0.01008)   |             |             |             |
| Excluding free association        |             |             |             | 0.0272***   |             |             |
|                                   |             |             |             | (0.00990)   |             |             |
| Excluding suffrage                |             |             |             |             | 0.0302***   |             |
|                                   |             |             |             |             | (0.01071)   |             |
| Excluding elected officials       |             |             |             |             |             | 0.0271***   |
|                                   |             |             |             |             |             | (0.01074)   |
| GDP per capita (ln)               | -0.4120**** | -0.4074**** | -0.4186**** | -0.4162**** | -0.4162**** | -0.4185**** |
|                                   | (0.07698)   | (0.07739)   | (0.0773)    | (0.07726)   | (0.07726)   | (0.07765)   |
| Urbanicity (ln)                   | 0.2296***   | 0.2119**    | 0.2287**    | 0.2330***   | 0.2294***   | 0.2256***   |
|                                   | (0.08111)   | (0.08191)   | (0.08221)   | (0.08375)   | (0.08175)   | (0.08453)   |
| Mortality shock                   | 0.0016      | 0.0016      | 0.0016      | 0.0015      | 0.00156     | 0.0016      |
|                                   | (0.00126)   | (0.00122)   | (0.00125)   | (0.00126)   | (0.00126)   | (0.00126)   |
| DAH per capita                    | 0.0003      | 0.0001      | 0.0002      | 0.0003      | 0.0003      | 0.0002      |
|                                   | (0.00068)   | (0.00062)   | (0.00066)   | (0.00067)   | (0.00068)   | (0.00067)   |
| Constant                          | 3.5168****  | 3.2937****  | 3.5504****  | 3.523****   | 3.5409****  | 3.596****   |
|                                   | (0.72640)   | (0.74867)   | (0.72737)   | (0.72811)   | (0.72657)   | (0.73013)   |
| Observations                      | 3280        | 3280        | 3280        | 3280        | 3280        | 3280        |
| Countries                         | 164         | 164         | 164         | 164         | 164         | 164         |
| Country fixed effects             | YES         | YES         | YES         | YES         | YES         | YES         |
| Year fixed effects                | YES         | YES         | YES         | YES         | YES         | YES         |



Notes: Cluster-robust standard errors reported in parentheses. \*  $p < 0.10$  \*\*  $p < 0.05$  \*\*\*  $p < 0.01$  \*\*\*\*  $p < 0.001$

### Neonatal Disorders

|                                   | (1)         | (2)         | (3)         | (4)         | (5)         | (6)         |
|-----------------------------------|-------------|-------------|-------------|-------------|-------------|-------------|
| All components included           | -0.0162**   |             |             |             |             |             |
|                                   | (0.00678)   |             |             |             |             |             |
| Excluding free and fair elections |             | -0.0067     |             |             |             |             |
|                                   |             | (0.00613)   |             |             |             |             |
| Excluding free expression         |             |             | -0.0156**   |             |             |             |
|                                   |             |             | (0.00624)   |             |             |             |
| Excluding free association        |             |             |             | -0.0156**   |             |             |
|                                   |             |             |             | (0.00616)   |             |             |
| Excluding suffrage                |             |             |             |             | -0.0175***  |             |
|                                   |             |             |             |             | (0.00661)   |             |
| Excluding elected officials       |             |             |             |             |             | -0.0187***  |
|                                   |             |             |             |             |             | (0.00662)   |
| GDP per capita (ln)               | -0.2239**** | -0.2161**** | -0.2213**** | -0.2228**** | -0.2230**** | -0.2239**** |
|                                   | (0.04592)   | (0.04699)   | (0.04522)   | (0.04551)   | (-0.04540)  | (-0.04503)  |
| Urbanicity (ln)                   | 0.0975*     | 0.1059*     | 0.0983*     | 0.0949*     | 0.0968*     | 0.0978*     |
|                                   | (0.05321)   | (0.06315)   | (0.05239)   | (0.05312)   | (0.05196)   | (0.05117)   |
| Mortality shock                   | 0.0004      | 0.0001      | 0.0004      | 0.0004      | 0.0004      | 0.0004      |
|                                   | (0.00068)   | (0.00070)   | (0.00068)   | (0.00068)   | (0.00068)   | (0.00068)   |
| DAH per capita                    | 0.0010**    | 0.0011**    | 0.0010**    | 0.0010**    | 0.0010**    | 0.0010**    |
|                                   | (0.00043)   | (0.00046)   | (0.00044)   | (0.00043)   | (0.00043)   | (0.00043)   |
| Constant                          | 4.839****   | 4.6857****  | 4.8509****  | 4.8670****  | 4.8618****  | 4.8888****  |
|                                   | (0.43069)   | (0.45326)   | (0.42632)   | (0.42923)   | (0.42496)   | (0.42254)   |
| Observations                      | 3280        | 3280        | 3280        | 3280        | 3280        | 3280        |
| Countries                         | 164         | 164         | 164         | 164         | 164         | 164         |

|                       |     |     |     |     |     |     |
|-----------------------|-----|-----|-----|-----|-----|-----|
| Country fixed effects | YES | YES | YES | YES | YES | YES |
| Year fixed effects    | YES | YES | YES | YES | YES | YES |

Notes: Cluster-robust standard errors reported in parentheses. \*  $p < 0.10$  \*\*  $p < 0.05$  \*\*\*  $p < 0.01$  \*\*\*\*  $p < 0.001$

### Nutritional deficiencies

|                                   | (1)         | (2)        | (3)         | (4)         | (5)         | (6)         |
|-----------------------------------|-------------|------------|-------------|-------------|-------------|-------------|
| All components included           | 0.0288**    |            |             |             |             |             |
|                                   | (0.01385)   |            |             |             |             |             |
| Excluding free and fair elections |             | 0.0156     |             |             |             |             |
|                                   |             | (0.01167)  |             |             |             |             |
| Excluding free expression         |             |            | 0.0246**    |             |             |             |
|                                   |             |            | (0.01240)   |             |             |             |
| Excluding free association        |             |            |             | 0.02849**   |             |             |
|                                   |             |            |             | (0.01242)   |             |             |
| Excluding suffrage                |             |            |             |             | 0.0306**    |             |
|                                   |             |            |             |             | (0.01367)   |             |
| Excluding elected officials       |             |            |             |             |             | 0.0371***   |
|                                   |             |            |             |             |             | (0.01355)   |
| GDP per capita (ln)               | -0.2779**** | -0.2880*** | -0.2845**** | -0.2790**** | -0.2798**** | -0.2747**** |
|                                   | (0.08477)   | (-0.08921) | (0.08573)   | (0.08484)   | (0.08496)   | (0.08499)   |
| Urbanicity (ln)                   | 0.1664      | 0.1512     | 0.1652      | 0.1717      | 0.1675      | 0.1675      |
|                                   | (0.10472)   | (0.09473)  | (0.10348)   | (0.10491)   | (0.10641)   | (0.11158)   |
| Mortality shock                   | 0.0015      | 0.0019     | 0.0016      | 0.0014      | 0.0015      | 0.0013      |
|                                   | (0.00210)   | (0.00221)  | (0.00211)   | (0.00208)   | (0.00209)   | (0.00207)   |
| DAH per capita                    | -0.0004     | -0.0005    | -0.0004     | -0.0004     | -0.0004     | -0.0003     |
|                                   | (0.00037)   | (0.00039)  | (0.00037)   | (0.00037)   | (0.00037)   | (0.00038)   |
| Constant                          | 3.1040****  | 3.2772**** | 3.1493****  | 3.0349****  | 3.0726****  | 2.9338****  |
|                                   | (0.77765)   | (0.86562)  | (0.78599)   | (0.77875)   | (0.77691)   | (0.79135)   |

|                       |      |      |      |      |      |      |
|-----------------------|------|------|------|------|------|------|
| Observations          | 3280 | 3280 | 3280 | 3280 | 3280 | 3280 |
| Countries             | 164  | 164  | 164  | 164  | 164  | 164  |
| Country fixed effects | YES  | YES  | YES  | YES  | YES  | YES  |
| Year fixed effects    | YES  | YES  | YES  | YES  | YES  | YES  |

*Notes: Cluster-robust standard errors reported in parentheses. \*  $p < 0.10$  \*\*  $p < 0.05$  \*\*\*  $p < 0.01$  \*\*\*\*  $p < 0.001$*

### Other Communicable, Maternal, Neonatal, and Nutritional Diseases

|                                   | (1)         | (2)         | (3)         | (4)         | (5)         | (6)         |
|-----------------------------------|-------------|-------------|-------------|-------------|-------------|-------------|
| All components included           | 0.0059      |             |             |             |             |             |
|                                   | (0.00830)   |             |             |             |             |             |
| Excluding free and fair elections |             | 0.0070      |             |             |             |             |
|                                   |             | (0.00710)   |             |             |             |             |
| Excluding free expression         |             |             | 0.0043      |             |             |             |
|                                   |             |             | (0.00762)   |             |             |             |
| Excluding free association        |             |             |             | 0.0049      |             |             |
|                                   |             |             |             | (0.00738)   |             |             |
| Excluding suffrage                |             |             |             |             | 0.0071      |             |
|                                   |             |             |             |             | (0.00821)   |             |
| Excluding elected officials       |             |             |             |             |             | 0.0074      |
|                                   |             |             |             |             |             | (0.00802)   |
| GDP per capita (ln)               | -0.2620**** | -0.2603**** | -0.2638**** | -0.2630**** | -0.2617**** | -0.2614**** |
|                                   | (0.05548)   | (0.05568)   | (0.05543)   | (0.055407)  | (0.05541)   | (0.05532)   |
| Urbanicity (ln)                   | 0.1827****  | 0.1793****  | 0.1821****  | 0.1832****  | 0.1833****  | 0.1828****  |
|                                   | (0.04095)   | (0.04144)   | (0.18209)   | (0.04138)   | (0.04018)   | (0.04015)   |
| Mortality shock                   | -0.00101    | -0.00102    | -0.00100    | -0.0010     | -0.0010     | -0.0011     |
|                                   | (0.00080)   | (0.00080)   | (0.00080)   | (0.00080)   | (0.00080)   | (0.00079)   |
| DAH per capita                    | -0.00002    | -0.00007    | -0.00004    | -0.00003    | -0.00002    | -0.00002    |
|                                   | (0.00029)   | (0.00030)   | (0.00029)   | (0.00029)   | (0.00029)   | (0.00030)   |

|                       |            |           |            |            |            |           |
|-----------------------|------------|-----------|------------|------------|------------|-----------|
| Constant              | 3.2884**** | 3.2239    | 3.3125**** | 3.2951**** | 3.2643**** | 3.257**** |
|                       | (0.52144)  | (0.53964) | (0.52208)  | (0.5220)   | (0.52129)  | (0.51994) |
| Observations          | 3280       | 3280      | 3280       | 3280       | 3280       | 3280      |
| Countries             | 164        | 164       | 164        | 164        | 164        | 164       |
| Country fixed effects | YES        | YES       | YES        | YES        | YES        | YES       |
| Year fixed effects    | YES        | YES       | YES        | YES        | YES        | YES       |

Notes: Cluster-robust standard errors reported in parentheses. \*  $p < 0.10$  \*\*  $p < 0.05$  \*\*\*  $p < 0.01$  \*\*\*\*  $p < 0.001$

## II. Non-communicable

### Neoplasms

|                                   | (1)        | (2)       | (3)       | (4)        | (5)        | (6)        |
|-----------------------------------|------------|-----------|-----------|------------|------------|------------|
| All components included           | -0.0061*** |           |           |            |            |            |
|                                   | (0.00212)  |           |           |            |            |            |
| Excluding free and fair elections |            | -0.00005  |           |            |            |            |
|                                   |            | (0.00215) |           |            |            |            |
| Excluding free expression         |            |           | -0.0049** |            |            |            |
|                                   |            |           | (0.00200) |            |            |            |
| Excluding free association        |            |           |           | -0.0055*** |            |            |
|                                   |            |           |           | (0.00193)  |            |            |
| Excluding suffrage                |            |           |           |            | -0.0057*** |            |
|                                   |            |           |           |            | (0.00210)  |            |
| Excluding elected officials       |            |           |           |            |            | -0.0055*** |
|                                   |            |           |           |            |            | (0.00209)  |
| GDP per capita (ln)               | -0.0255    | -0.0201   | -0.0239   | -0.0248    | -0.0245    | -0.0244    |
|                                   | (0.01678)  | (0.01710) | (0.01688) | (0.01680)  | (0.01680)  | (0.01682)  |
| Urbanicity (ln)                   | 0.0457**   | 0.0486*   | 0.0461**  | 0.0449**   | 0.0458**   | 0.0464**   |
|                                   | (0.02165)  | (0.02636) | (0.02221) | (0.02177)  | (0.02196)  | (0.02221)  |
| Mortality shock                   | 0.0007**   | 0.0006**  | 0.0007**  | 0.0007***  | 0.0007**   | 0.0007**   |

|                       |            |           |           |            |            |            |
|-----------------------|------------|-----------|-----------|------------|------------|------------|
|                       | (0.00028)  | (0.00028) | (0.00028) | (0.00028)  | (0.00028)  | (0.00023)  |
| DAH per capita        | 0.0005**   | 0.0006**  | 0.0005**  | 0.0005**   | 0.0005**   | 0.0005**   |
|                       | (0.00023)  | (0.00023) | (0.00023) | (0.00023)  | (0.00023)  | (0.00023)  |
| Constant              | 5.1832**** | 5.060**** | 5.167**** | 5.1850**** | 5.1733**** | 5.1718**** |
|                       | (0.15716)  | (0.16836) | (0.15844) | (0.15707)  | (0.15695)  | (0.15681)  |
| Observations          | 3280       | 3280      | 3280      | 3280       | 3280       | 3280       |
| Countries             | 164        | 164       | 164       | 164        | 164        | 164        |
| Country fixed effects | YES        | YES       | YES       | YES        | YES        | YES        |
| Year fixed effects    | YES        | YES       | YES       | YES        | YES        | YES        |

*Notes: Cluster-robust standard errors reported in parentheses. \*  $p < 0.10$  \*\*  $p < 0.05$  \*\*\*  $p < 0.01$  \*\*\*\*  $p < 0.001$*

### Cardiovascular Deaths

|                                   | (1)          | (2)       | (3)         | (4)         | (5)         | (6)         |
|-----------------------------------|--------------|-----------|-------------|-------------|-------------|-------------|
| All components included           | -0.02357**** |           |             |             |             |             |
|                                   | (0.00407)    |           |             |             |             |             |
| Excluding free and fair elections |              | -0.0076*  |             |             |             |             |
|                                   |              | (0.00386) |             |             |             |             |
| Excluding free expression         |              |           | -0.0192**** |             |             |             |
|                                   |              |           | (0.00385)   |             |             |             |
| Excluding free association        |              |           |             | -0.0204**** |             |             |
|                                   |              |           |             | 0.00374     |             |             |
| Excluding suffrage                |              |           |             |             | -0.0224**** |             |
|                                   |              |           |             |             | (0.00403)   |             |
| Excluding elected officials       |              |           |             |             |             | -0.0233**** |
|                                   |              |           |             |             |             | (0.00398)   |
| GDP per capita (ln)               | -0.0643**    | -0.0509*  | -0.0581*    | -0.0610*    | -0.06073*   | -0.0616*    |
|                                   | (0.03227)    | (0.03330) | (0.03292)   | (0.03277)   | (0.03267)   | (0.00398)   |

|                       |            |            |            |            |            |            |
|-----------------------|------------|------------|------------|------------|------------|------------|
| Urbanicity (ln)       | 0.0076     | 0.0196     | 0.0091     | 0.0052     | 0.0080     | 0.0095     |
|                       | (0.03534)  | (0.04880)  | (0.03728)  | (0.03732)  | (0.03623)  | (0.03569)  |
| Mortality shock       | 0.0005     | 0.0001     | 0.0005     | 0.0006     | 0.0005     | 0.0005     |
|                       | (0.00045)  | (0.00049)  | (0.00046)  | (0.00044)  | (0.0005)   | (0.00045)  |
| DAH per capita        | 0.0011***  | 0.0013***  | 0.0012***  | 0.0011***  | 0.0011***  | 0.0011***  |
|                       | (0.00037)  | (0.00042)  | (0.00038)  | 0.00038    | (0.000374) | (0.00037)  |
| Constant              | 6.5431**** | 6.2636**** | 6.4849**** | 6.5338**** | 6.5150**** | 6.542****  |
|                       | (0.29296)  | (0.30750)  | (0.29800)  | (0.29621)  | (0.29560)  | (0.294830) |
| Observations          | 3280       | 3280       | 3280       | 3280       | 3280       | 3280       |
| Countries             | 164        | 164        | 164        | 164        | 164        | 164        |
| Country fixed effects | YES        | YES        | YES        | YES        | YES        | YES        |
| Year fixed effects    | YES        | YES        | YES        | YES        | YES        | YES        |

Notes: Cluster-robust standard errors reported in parentheses. \*  $p < 0.10$  \*\*  $p < 0.05$  \*\*\*  $p < 0.01$  \*\*\*\*  $p < 0.001$

### Chronic Respiratory Deaths

|                                   | (1)       | (2)       | (3)       | (4)       | (5)      | (6)       |
|-----------------------------------|-----------|-----------|-----------|-----------|----------|-----------|
| All components included           | 0.0095    |           |           |           |          |           |
|                                   | (0.00583) |           |           |           |          |           |
| Excluding free and fair elections |           | 0.0146**  |           |           |          |           |
|                                   |           | (0.00603) |           |           |          |           |
| Excluding free expression         |           |           | 0.0098*   |           |          |           |
|                                   |           |           | (0.00541) |           |          |           |
| Excluding free association        |           |           |           | 0.0102*   |          |           |
|                                   |           |           |           | (0.00541) |          |           |
| Excluding suffrage                |           |           |           |           | 0.0114*  |           |
|                                   |           |           |           |           | (0.0058) |           |
| Excluding elected officials       |           |           |           |           |          | 0.0111*   |
|                                   |           |           |           |           |          | (0.00594) |

|                       |             |             |             |             |             |             |
|-----------------------|-------------|-------------|-------------|-------------|-------------|-------------|
| GDP per capita (ln)   | -0.2050**** | -0.1990**** | -0.2059**** | -0.2047**** | -0.2047**** | -0.2049**** |
|                       | (0.04454)   | (0.04428)   | (0.04484)   | (0.04460)   | (0.04473)   | (0.04467)   |
| Urbanicity (ln)       | 0.1270***   | 0.1212**    | 0.1275***   | 0.1293***   | 0.1280***   | 0.1269***   |
|                       | (0.04418)   | (0.04763)   | (0.04514)   | (0.04515)   | (0.04568)   | (0.04533)   |
| Mortality shock       | 0.0014      | 0.0013      | 0.0013      | 0.0013      | 0.0013      | 0.0013      |
|                       | (0.00090)   | (0.00090)   | (0.00090)   | (0.00089)   | (0.00033)   | (0.00089)   |
| DAH per capita        | 0.0006*     | 0.0006*     | 0.0006*     | 0.0006*     | 0.0006*     | 0.0006*     |
|                       | (0.00032)   | (0.00031)   | (0.00032)   | (0.00033)   | (0.00033)   | (0.00033)   |
| Constant              | 5.419****   | 5.2263****  | 5.3964****  | 5.3783****  | 5.3832****  | 5.3866****  |
|                       | (0.40286)   | (0.4185)    | (0.40551)   | (0.40210)   | (0.40420)   | (0.40170)   |
| Observations          | 3280        | 3280        | 3280        | 3280        | 3280        | 3280        |
| Countries             | 164         | 164         | 164         | 164         | 164         | 164         |
| Country fixed effects | YES         | YES         | YES         | YES         | YES         | YES         |
| Year fixed effects    | YES         | YES         | YES         | YES         | YES         | YES         |

Notes: Cluster-robust standard errors reported in parentheses. \*  $p < 0.10$  \*\*  $p < 0.05$  \*\*\*  $p < 0.01$  \*\*\*\*  $p < 0.001$

### Cirrhosis and Other Chronic Liver Diseases

|                                   | (1)       | (2)       | (3)       | (4)       | (5)       | (6) |
|-----------------------------------|-----------|-----------|-----------|-----------|-----------|-----|
| All components included           | -0.0066   |           |           |           |           |     |
|                                   | (0.00651) |           |           |           |           |     |
| Excluding free and fair elections |           | -0.0019   |           |           |           |     |
|                                   |           | (0.00557) |           |           |           |     |
| Excluding free expression         |           |           | -0.0057   |           |           |     |
|                                   |           |           | (0.00582) |           |           |     |
| Excluding free association        |           |           |           | -0.0055   |           |     |
|                                   |           |           |           | (0.00597) |           |     |
| Excluding suffrage                |           |           |           |           | -0.0058   |     |
|                                   |           |           |           |           | (0.00647) |     |

|                             |            |            |            |            |            |            |
|-----------------------------|------------|------------|------------|------------|------------|------------|
| Excluding elected officials |            |            |            |            |            | -0.0081    |
|                             |            |            |            |            |            | (0.00649)  |
| GDP per capita (ln)         | 0.0732     | 0.0772     | 0.0747     | 0.0744     | 0.0746     | 0.0728     |
|                             | (0.05222)  | (0.05208)  | (0.05230)  | (0.05227)  | (0.05220)  | (0.05235)  |
| Urbanicity (ln)             | -0.0194    | -0.0161    | -0.0192    | -0.0199    | -0.0190    | -0.0195    |
|                             | (0.07080)  | (0.06616)  | (0.07048)  | (0.06989)  | (0.07001)  | (0.07232)  |
| Mortality shock             | -0.0012    | -0.0013    | -0.0012    | -0.0012    | -0.0012    | -0.0011    |
|                             | (0.00090)  | (0.00095)  | (0.00091)  | (0.00090)  | (0.00090)  | (0.00090)  |
| DAH per capita              | 0.00001    | 0.00005    | 0.00003    | 0.00002    | 0.00002    | 0.00001    |
|                             | (0.00024)  | (0.00025)  | (0.00025)  | (0.00025)  | (0.00024)  | (0.00025)  |
| Constant                    | 2.3755**** | 2.2922**** | 2.3669**** | 2.3675**** | 2.3580**** | 2.4074**** |
|                             | (0.48442)  | (0.48507)  | (0.48285)  | (0.48477)  | (0.48258)  | (0.48531)  |
| Observations                | 3280       | 3280       | 3280       | 3280       | 3280       | 3280       |
| Countries                   | 164        | 164        | 164        | 164        | 164        | 164        |
| Country fixed effects       | YES        | YES        | YES        | YES        | YES        | YES        |
| Year fixed effects          | YES        | YES        | YES        | YES        | YES        | YES        |

Notes: Cluster-robust standard errors reported in parentheses. \*  $p < 0.10$  \*\*  $p < 0.05$  \*\*\*  $p < 0.01$  \*\*\*\*  $p < 0.001$

### Digestive Diseases

|                                   | (1)       | (2)       | (3)       | (4)       | (5) | (6) |
|-----------------------------------|-----------|-----------|-----------|-----------|-----|-----|
| All components included           | 0.0069*   |           |           |           |     |     |
|                                   | (0.00388) |           |           |           |     |     |
| Excluding free and fair elections |           | 0.0086**  |           |           |     |     |
|                                   |           | (0.00371) |           |           |     |     |
| Excluding free expression         |           |           | 0.0076**  |           |     |     |
|                                   |           |           | (0.00367) |           |     |     |
| Excluding free association        |           |           |           | 0.0074**  |     |     |
|                                   |           |           |           | (0.00363) |     |     |



|                             |             |             |             |             |             |             |
|-----------------------------|-------------|-------------|-------------|-------------|-------------|-------------|
| Excluding suffrage          |             |             |             |             | 0.0078**    |             |
|                             |             |             |             |             | (0.00388)   |             |
| Excluding elected officials |             |             |             |             |             | 0.0068*     |
|                             |             |             |             |             |             | (0.00387)   |
| GDP per capita (ln)         | -0.0988**** | -0.0961**** | -0.0989**** | -0.0984**** | -0.0986**** | -0.0994**** |
|                             | (0.02798)   | (0.02794)   | (0.02772)   | (0.02778)   | (0.02780)   | (0.02796)   |
| Urbanicity (ln)             | 0.0804**    | 0.0765**    | 0.0811**    | 0.0822**    | 0.0811**    | 0.0800**    |
|                             | (0.03522)   | (0.03464)   | (0.03389)   | (0.03446)   | (0.03423)   | (0.03532)   |
| Mortality shock             | 0.00008     | 0.00005     | 0.00003     | 0.00003     | 0.00005     | 0.00007     |
|                             | (0.00061)   | (0.00062)   | (0.00062)   | (0.00061)   | (0.00062)   | (0.00061)   |
| DAH per capita              | 0.0004      | 0.0003      | 0.0004      | 0.0004      | 0.0004      | 0.0004      |
|                             | (0.00023)   | (0.00023)   | (0.00023)   | (0.00023)   | (0.00023)   | (0.00023)   |
| Constant                    | 3.7819****  | 3.6894****  | 3.7519****  | 3.748****   | 3.7594****  | 3.778****   |
|                             | (0.26661)   | (0.28238)   | (0.26695)   | (0.26765)   | (0.26573)   | (0.26729)   |
| Observations                | 3280        | 3280        | 3280        | 3280        | 3280        | 3280        |
| Countries                   | 164         | 164         | 164         | 164         | 164         | 164         |
| Country fixed effects       | YES         | YES         | YES         | YES         | YES         | YES         |
| Year fixed effects          | YES         | YES         | YES         | YES         | YES         | YES         |

Notes: Cluster-robust standard errors reported in parentheses. \*  $p < 0.10$  \*\*  $p < 0.05$  \*\*\*  $p < 0.01$  \*\*\*\*  $p < 0.001$

### Neurological Disorders

|                                   | (1)        | (2)       | (3)        | (4) | (5) | (6) |
|-----------------------------------|------------|-----------|------------|-----|-----|-----|
| All components included           | -0.0028*** |           |            |     |     |     |
|                                   | (0.00098)  |           |            |     |     |     |
| Excluding free and fair elections |            | -0.0017*  |            |     |     |     |
|                                   |            | (0.00093) |            |     |     |     |
| Excluding free expression         |            |           | -0.0027*** |     |     |     |
|                                   |            |           | (0.00097)  |     |     |     |

|                             |            |            |            |            |            |            |
|-----------------------------|------------|------------|------------|------------|------------|------------|
| Excluding free association  |            |            |            | -0.0024**  |            |            |
|                             |            |            |            | (0.00096)  |            |            |
| Excluding suffrage          |            |            |            |            | -0.0026**  |            |
|                             |            |            |            |            | (0.00099)  |            |
| Excluding elected officials |            |            |            |            |            | -0.0028*** |
|                             |            |            |            |            |            | (0.00097)  |
| GDP per capita (ln)         | 0.0172***  | 0.0180***  | 0.0177***  | 0.0177***  | 0.0178***  | 0.0176***  |
|                             | (0.00583)  | (0.00601)  | (0.00586)  | (0.00589)  | (0.00584)  | (0.00581)  |
| Urbanicity (ln)             | 0.0117     | 0.0132     | 0.0117     | 0.0114     | 0.0118     | 0.0119     |
|                             | (0.01294)  | (0.00016)  | (0.01287)  | (0.01328)  | (0.01312)  | (0.01297)  |
| Mortality shock             | 0.0008     | 0.00005    | 0.00009    | 0.00009    | 0.00008    | 0.00008    |
|                             | (0.00016)  | (0.00009)  | (0.00016)  | (0.00016)  | (0.00016)  | (0.00016)  |
| DAH per capita              | 0.0002     | 0.0002**   | 0.0002**   | 0.0002*    | 0.0002*    | 0.0002*    |
|                             | (0.00008)  | (0.00009)  | (0.00008)  | (0.00008)  | (0.00008)  | (0.00008)  |
| Constant                    | 3.6865**** | 3.6748**** | 3.6872**** | 3.6848**** | 3.6803**** | 3.6848**** |
|                             | (0.05070)  | (0.05464)  | (0.05158)  | (0.05212)  | (0.05089)  | (0.05068)  |
| Observations                | 3280       | 3280       | 3280       | 3280       | 3280       | 3280       |
| Countries                   | 164        | 164        | 164        | 164        | 164        | 164        |
| Country fixed effects       | YES        | YES        | YES        | YES        | YES        | YES        |
| Year fixed effects          | YES        | YES        | YES        | YES        | YES        | YES        |

Notes: Cluster-robust standard errors reported in parentheses. \*  $p < 0.10$  \*\*  $p < 0.05$  \*\*\*  $p < 0.01$  \*\*\*\*  $p < 0.001$

### Mental and Substance Use Disorders

|                                   | (1)       | (2)       | (3) | (4) | (5) | (6) |
|-----------------------------------|-----------|-----------|-----|-----|-----|-----|
| All components included           | 0.0022    |           |     |     |     |     |
|                                   | (0.00827) |           |     |     |     |     |
| Excluding free and fair elections |           | 0.0048    |     |     |     |     |
|                                   |           | (0.00804) |     |     |     |     |

|                             |            |           |           |            |            |            |
|-----------------------------|------------|-----------|-----------|------------|------------|------------|
| Excluding free expression   |            |           | 0.0005    |            |            |            |
|                             |            |           | (0.0077)  |            |            |            |
| Excluding free association  |            |           |           | 0.0007     |            |            |
|                             |            |           |           | (0.00751)  |            |            |
| Excluding suffrage          |            |           |           |            | 0.0027     |            |
|                             |            |           |           |            | (0.00806)  |            |
| Excluding elected officials |            |           |           |            |            | 0.00049    |
|                             |            |           |           |            |            | (0.00817)  |
| GDP per capita (ln)         | -0.0564    | -0.0536   | -0.0580   | -0.0577    | -0.0562    | -0.0580    |
|                             | (0.04940)  | (0.04944) | (0.04899) | (0.04910)  | (0.04907)  | (0.04943)  |
| Urbanicity (ln)             | -0.0081    | -0.0096   | -0.0089   | -0.0087    | -0.0079    | -0.00900   |
|                             | (0.04020)  | (0.03969) | (0.04074) | (0.04067)  | (0.04008)  | (0.04100)  |
| Mortality shock             | -0.0002    | -0.0002   | -0.0001   | -0.0001    | -0.0002    | -0.00014   |
|                             | (0.00067)  | (0.00038) | (0.00067) | (0.00067)  | (0.00067)  | (0.00068)  |
| DAH per capita              | 0.0004     | 0.0003    | 0.0004    | 0.0004     | 0.0004     | 0.0004     |
|                             | (0.00039)  | (0.00038) | (0.00039) | (0.00039)  | (0.00039)  | (0.00039)  |
| Constant                    | 1.6006**** | 1.5197*** | 1.635**** | 1.6286**** | 1.5907**** | 1.6357**** |
|                             | (0.49170)  | (0.51530) | (0.49036) | (0.49159)  | (0.48946)  | (0.49622)  |
| Observations                | 3280       | 3280      | 3280      | 3280       | 3280       | 3280       |
| Countries                   | 164        | 164       | 164       | 164        | 164        | 164        |
| Country fixed effects       | YES        | YES       | YES       | YES        | YES        | YES        |
| Year fixed effects          | YES        | YES       | YES       | YES        | YES        | YES        |

Notes: Cluster-robust standard errors reported in parentheses. \*  $p < 0.10$  \*\*  $p < 0.05$  \*\*\*  $p < 0.01$  \*\*\*\*  $p < 0.001$

### Diabetes, Urogenital, Blood, and Endocrine Diseases Deaths

|                         | (1)       | (2) | (3) | (4) | (5) | (6) |
|-------------------------|-----------|-----|-----|-----|-----|-----|
| All components included | -0.003    |     |     |     |     |     |
|                         | (0.00545) |     |     |     |     |     |

|                                   |            |            |            |            |            |            |
|-----------------------------------|------------|------------|------------|------------|------------|------------|
| Excluding free and fair elections |            | 0.0012     |            |            |            |            |
|                                   |            | (0.00552)  |            |            |            |            |
| Excluding free expression         |            |            | -0.0024    |            |            |            |
|                                   |            |            | (0.03582)  |            |            |            |
| Excluding free association        |            |            |            | -0.0041    |            |            |
|                                   |            |            |            | (0.00483)  |            |            |
| Excluding suffrage                |            |            |            |            | -0.0032    |            |
|                                   |            |            |            |            | (0.00545)  |            |
| Excluding elected officials       |            |            |            |            |            | -0.0024    |
|                                   |            |            |            |            |            | (0.00536)  |
| GDP per capita (ln)               | -0.0470    | -0.0434    | -0.0464    | -0.0481    | -0.0471    | -0.0465    |
|                                   | (0.03579)  | (0.03683)  | (0.03582)  | (0.03547)  | (0.03572)  | (0.03592)  |
| Urbanicity (ln)                   | 0.0176     | 0.0187     | 0.0176     | 0.0161     | 0.0173     | 0.0179     |
|                                   | (0.00073)  | (0.04154)  | (0.03857)  | (0.03744)  | (0.03572)  | (0.03898)  |
| Mortality shock                   | -0.0008    | -0.0009    | -0.0008    | -0.0008    | -0.0008    | -0.0008    |
|                                   | (0.00032)  | (0.00072)  | (0.00073)  | (0.00071)  | (0.00073)  | (0.00072)  |
| DAH per capita                    | 0.0005     | 0.0005     | 0.0005     | 0.0005     | 0.0005     | 0.0005     |
|                                   | (0.00032)  | (0.00033)  | (0.00032)  | (0.00032)  | (0.00032)  | (0.00032)  |
| Constant                          | 4.4998**** | 4.4122**** | 4.4964**** | 4.5390**** | 4.5099**** | 4.4941**** |
|                                   | (0.34012)  | (0.00257)  | (0.34240)  | (0.33482)  | (0.33912)  | (0.34231)  |
| Observations                      | 3280       | 3280       | 3280       | 3280       | 3280       | 3280       |
| Countries                         | 164        | 164        | 164        | 164        | 164        | 164        |
| Country fixed effects             | YES        | YES        | YES        | YES        | YES        | YES        |
| Year fixed effects                | YES        | YES        | YES        | YES        | YES        | YES        |

Notes: Cluster-robust standard errors reported in parentheses. \*  $p < 0.10$  \*\*  $p < 0.05$  \*\*\*  $p < 0.01$  \*\*\*\*  $p < 0.001$

### Musculoskeletal Disorders

|  | (1) | (2) | (3) | (4) | (5) | (6) |
|--|-----|-----|-----|-----|-----|-----|
|--|-----|-----|-----|-----|-----|-----|

|                                   |           |           |           |           |           |           |
|-----------------------------------|-----------|-----------|-----------|-----------|-----------|-----------|
| All components included           | -0.0056   |           |           |           |           |           |
|                                   | (0.00682) |           |           |           |           |           |
| Excluding free and fair elections |           | 0.0043    |           |           |           |           |
|                                   |           | (0.00648) |           |           |           |           |
| Excluding free expression         |           |           | 0.0004    |           |           |           |
|                                   |           |           | (0.00658) |           |           |           |
| Excluding free association        |           |           |           | -0.0013   |           |           |
|                                   |           |           |           | (0.00648) |           |           |
| Excluding suffrage                |           |           |           |           | -0.0013   |           |
|                                   |           |           |           |           | (0.00708) |           |
| Excluding elected officials       |           |           |           |           |           | 0.0011    |
|                                   |           |           |           |           |           | (0.00714) |
| GDP per capita (ln)               | 0.0141    | 0.0234    | 0.0194    | 0.0180    | 0.0181    | 0.0199    |
|                                   | (0.04676) | (0.04678) | (0.04720) | (0.04708) | (0.04716) | (0.04769) |
| Urbanicity (ln)                   | -0.0279   | -0.0256   | -0.0250   | -0.0261   | -0.0259   | -0.0248   |
|                                   | (0.06376) | (0.05495) | (0.0577)  | (0.05951) | (0.00085) | (0.05767) |
| Mortality shock                   | -0.0007   | -0.0010   | -0.0009   | -0.0008   | -0.0009   | -0.0009   |
|                                   | (0.00084) | (0.00088) | (0.00085) | (0.00084) | (0.00085) | (0.00085) |
| DAH per capita                    | 0.0002    | 0.0002    | 0.0002    | 0.0002    | 0.0002    | 0.0002    |
|                                   | (0.00030) | (0.00031) | (0.00031) | (0.00031) | (0.00031) | (0.00031) |
| Constant                          | 0.0077    | -0.2203   | -0.1149   | -0.0761   | -0.0795   | -0.1280   |
|                                   | (0.41830) | (0.4225)  | (0.42358) | (0.42283) | (0.42401) | (0.43635) |
| Observations                      | 3280      | 3280      | 3280      | 3280      | 3280      | 3280      |
| Countries                         | 164       | 164       | 164       | 164       | 164       | 164       |
| Country fixed effects             | YES       | YES       | YES       | YES       | YES       | YES       |
| Year fixed effects                | YES       | YES       | YES       | YES       | YES       | YES       |

Notes: Cluster-robust standard errors reported in parentheses. \*  $p < 0.10$  \*\*  $p < 0.05$  \*\*\*  $p < 0.01$  \*\*\*\*  $p < 0.001$

**Other Non-communicable Diseases**

|                                   | (1)         | (2)         | (3)         | (4)         | (5)         | (6)         |
|-----------------------------------|-------------|-------------|-------------|-------------|-------------|-------------|
| All components included           | -0.0103**** |             |             |             |             |             |
|                                   | (0.00274)   |             |             |             |             |             |
| Excluding free and fair elections |             | -0.0018     |             |             |             |             |
|                                   |             | (0.00265)   |             |             |             |             |
| Excluding free expression         |             |             | -0.0082***  |             |             |             |
|                                   |             |             | (0.00262)   |             |             |             |
| Excluding free association        |             |             |             | -0.0092**** |             |             |
|                                   |             |             |             | (0.002495)  |             |             |
| Excluding suffrage                |             |             |             |             | -0.0099**** |             |
|                                   |             |             |             |             | (0.00271)   |             |
| Excluding elected officials       |             |             |             |             |             | -0.0104**** |
|                                   |             |             |             |             |             | (0.00269)   |
| GDP per capita (ln)               | -0.0736**** | -0.0662**** | -0.0708**** | -0.0724**** | -0.0721**** | -0.0726**** |
|                                   | (0.01916)   | (0.01949)   | (0.01934)   | (0.01924)   | (0.01925)   | (0.01922)   |
| Urbanicity (ln)                   | 0.0390*     | 0.0441*     | 0.0397*     | 0.0377*     | 0.0391*     | 0.0397*     |
|                                   | (0.02013)   | (0.02565)   | (0.02080)   | (0.02034)   | (0.02039)   | (0.02028)   |
| Mortality shock                   | 0.0003      | 0.0001      | 0.0003      | 0.0003      | 0.0003      | 0.0003      |
|                                   | (0.00030)   | (0.00031)   | (0.00030)   | (0.00029)   | (0.00030)   | (0.00030)   |
| DAH per capita                    | 0.0007***   | 0.0008***   | 0.0007***   | 0.0007**    | 0.0007***   | 0.0007***   |
|                                   | (0.00027)   | (0.00029)   | (0.00027)   | (0.00027)   | (0.00027)   | (0.00027)   |
| Constant                          | 7.288****   | 7.1254****  | 7.2581****  | 7.2906****  | 7.2767****  | 7.2907****  |
|                                   | (0.17927)   | (0.18598)   | (0.18071)   | (0.17885)   | (0.17931)   | (0.17869)   |
| Observations                      | 3280        | 3280        | 3280        | 3280        | 3280        | 3280        |
| Countries                         | 164         | 164         | 164         | 164         | 164         | 164         |
| Country fixed effects             | YES         | YES         | YES         | YES         | YES         | YES         |

|                    |     |     |     |     |     |     |
|--------------------|-----|-----|-----|-----|-----|-----|
| Year fixed effects | YES | YES | YES | YES | YES | YES |
|--------------------|-----|-----|-----|-----|-----|-----|

Notes: Cluster-robust standard errors reported in parentheses. \*  $p < 0.10$  \*\*  $p < 0.05$  \*\*\*  $p < 0.01$  \*\*\*\*  $p < 0.001$

## II. Injuries

### Transport Injuries

|                                   | (1)         | (2)        | (3)         | (4)         | (5)         | (6)         |
|-----------------------------------|-------------|------------|-------------|-------------|-------------|-------------|
| All components included           | -0.0276**** |            |             |             |             |             |
|                                   | (0.00714)   |            |             |             |             |             |
| Excluding free and fair elections |             | -0.0110*   |             |             |             |             |
|                                   |             | (0.00611)  |             |             |             |             |
| Excluding free expression         |             |            | -0.0223**** |             |             |             |
|                                   |             |            | (0.00651)   |             |             |             |
| Excluding free association        |             |            |             | -0.0257**** |             |             |
|                                   |             |            |             | (0.00630)   |             |             |
| Excluding suffrage                |             |            |             |             | -0.0276**** |             |
|                                   |             |            |             |             | (0.00694)   |             |
| Excluding elected officials       |             |            |             |             |             | -0.0282**** |
|                                   |             |            |             |             |             | (0.00685)   |
| GDP per capita (ln)               | -0.0214     | -0.0077    | -0.0139     | -0.0189     | -0.0182     | -0.0187     |
|                                   | (0.04528)   | (0.04667)  | (0.04594)   | (0.04586)   | (0.04575)   | (0.04585)   |
| Urbanicity (ln)                   | 0.0845**    | 0.0987*    | 0.0864**    | 0.0806**    | 0.0843**    | 0.0864**    |
|                                   | (0.03655)   | (0.05138)  | (0.03919)   | (0.03736)   | (0.03676)   | (0.03695)   |
| Mortality shock                   | 0.0008      | 0.0004     | 0.0007      | 0.0009      | 0.0008      | 0.0008      |
|                                   | (0.00066)   | (0.0007)   | (0.00066)   | (0.00065)   | (0.00066)   | (0.00066)   |
| DAH per capita                    | 0.0015****  | 0.0016**** | 0.0015****  | 0.0015****  | 0.0015****  | 0.0015****  |
|                                   | (0.00040)   | (0.00046)  | (0.00042)   | (0.00041)   | (0.00041)   | (0.00040)   |
| Constant                          | 3.3474****  | 3.0755**** | 3.2751****  | 3.3764****  | 3.342****   | 3.3614****  |
|                                   | (0.42290)   | (0.45194)  | (0.42938)   | (0.42666)   | (0.42608)   | (0.42493)   |

|                       |      |      |      |      |      |      |
|-----------------------|------|------|------|------|------|------|
| Observations          | 3280 | 3280 | 3280 | 3280 | 3280 | 3280 |
| Countries             | 164  | 164  | 164  | 164  | 164  | 164  |
| Country fixed effects | YES  | YES  | YES  | YES  | YES  | YES  |
| Year fixed effects    | YES  | YES  | YES  | YES  | YES  | YES  |

*Notes: Cluster-robust standard errors reported in parentheses. \*  $p < 0.10$  \*\*  $p < 0.05$  \*\*\*  $p < 0.01$  \*\*\*\*  $p < 0.001$*

### Unintentional Injuries

|                                   | (1)         | (2)         | (3)         | (4)         | (5)         | (6)         |
|-----------------------------------|-------------|-------------|-------------|-------------|-------------|-------------|
| All components included           | -0.0004     |             |             |             |             |             |
|                                   | (0.00400)   |             |             |             |             |             |
| Excluding free and fair elections |             | 0.0019      |             |             |             |             |
|                                   |             | (0.00369)   |             |             |             |             |
| Excluding free expression         |             |             | -0.00040    |             |             |             |
|                                   |             |             | (0.00371)   |             |             |             |
| Excluding free association        |             |             |             | -0.0006     |             |             |
|                                   |             |             |             | (0.00269)   |             |             |
| Excluding suffrage                |             |             |             |             | -0.0001     |             |
|                                   |             |             |             |             | (0.00399)   |             |
| Excluding elected officials       |             |             |             |             |             | -0.0016     |
|                                   |             |             |             |             |             | (0.00386)   |
| GDP per capita (ln)               | -0.1446**** | -0.1424**** | -0.1446**** | -0.1448**** | -0.1443**** | -0.1455**** |
|                                   | (0.02728)   | (0.02789)   | (0.02719)   | (0.02720)   | (0.02723)   | (0.02723)   |
| Urbanicity (ln)                   | 0.0326      | 0.03267     | 0.0326      | 0.0324      | 0.0328      | 0.0322      |
|                                   | (0.02525)   | (0.02721)   | (0.02524)   | (0.02507)   | (0.02546)   | (0.02724)   |
| Mortality shock                   | 0.0003      | 0.0002      | 0.0003      | 0.0003      | 0.0003      | 0.0003      |
|                                   | (0.00059)   | (0.00058)   | (0.00059)   | (0.00059)   | (0.00059)   | (0.00059)   |
| DAH per capita                    | 0.0006**    | 0.0006**    | 0.0006**    | 0.0006**    | 0.0006**    | 0.0006**    |
|                                   | (0.0003)    | (0.00028)   | (0.00028)   | (0.00028)   | (0.00028)   | (0.00028)   |



|                       |                         |                         |                         |                         |                        |                         |
|-----------------------|-------------------------|-------------------------|-------------------------|-------------------------|------------------------|-------------------------|
| Constant              | 4.4876****<br>(0.25524) | 4.4286****<br>(0.27393) | 4.4876****<br>(0.25497) | 4.4931****<br>(0.25545) | 4.4805****<br>(0.2549) | 4.5119****<br>(0.25570) |
| Observations          | 3280                    | 3280                    | 3280                    | 3280                    | 3280                   | 3280                    |
| Countries             | 164                     | 164                     | 164                     | 164                     | 164                    | 164                     |
| Country fixed effects | YES                     | YES                     | YES                     | YES                     | YES                    | YES                     |
| Year fixed effects    | YES                     | YES                     | YES                     | YES                     | YES                    | YES                     |

Notes: Cluster-robust standard errors reported in parentheses. \*  $p < 0.10$  \*\*  $p < 0.05$  \*\*\*  $p < 0.01$  \*\*\*\*  $p < 0.001$

### Self-harm and Interpersonal Violence

|                                   | (1)                      | (2)                      | (3)                      | (4)                      | (5)                      | (6)                      |
|-----------------------------------|--------------------------|--------------------------|--------------------------|--------------------------|--------------------------|--------------------------|
| All components included           | -0.0001<br>(0.00616)     |                          |                          |                          |                          |                          |
| Excluding free and fair elections |                          | 0.0034<br>(0.00526)      |                          |                          |                          |                          |
| Excluding free expression         |                          |                          | 0.0004<br>(0.00562)      |                          |                          |                          |
| Excluding free association        |                          |                          |                          | -0.0009<br>(0.00558)     |                          |                          |
| Excluding suffrage                |                          |                          |                          |                          | 0.0003<br>(0.00606)      |                          |
| Excluding elected officials       |                          |                          |                          |                          |                          | -0.0013<br>(0.00601)     |
| GDP per capita (ln)               | -0.1612****<br>(0.03295) | -0.1567****<br>(0.03287) | -0.1598****<br>(0.03264) | -0.1609****<br>(0.03269) | -0.1599****<br>(0.03279) | -0.1612****<br>(0.03276) |
| Urbanicity (ln)                   | 0.0320<br>(0.03251)      | 0.0318<br>(0.03400)      | 0.0323<br>(0.03265)      | 0.0314<br>(0.03223)      | 0.0322<br>(0.03263)      | 0.0315<br>(0.03234)      |
| Mortality shock                   | 0.0002<br>(0.00072)      | 0.0001<br>(0.00072)      | 0.0002<br>(0.00072)      | 0.0002<br>(0.00072)      | 0.0002<br>(0.00072)      | 0.0002<br>(0.00072)      |

|                       |            |            |            |            |            |           |
|-----------------------|------------|------------|------------|------------|------------|-----------|
| DAH per capita        | 0.0009***  | 0.0009***  | 0.0009***  | 0.0009***  | 0.0009***  | 0.0009*** |
|                       | (0.00028)  | (0.00029)  | (0.00028)  | (0.00028)  | (0.00028)  | (0.00028) |
| Constant              | 4.1415**** | 4.0495**** | 4.1307**** | 4.1611**** | 4.1338**** | 4.167**** |
|                       | (0.32534)  | (0.33282)  | (0.32230)  | (0.32338)  | (0.32404)  | (0.32353) |
| Observations          | 3280       | 3280       | 3280       | 3280       | 3280       | 3280      |
| Countries             | 164        | 164        | 164        | 164        | 164        | 164       |
| Country fixed effects | YES        | YES        | YES        | YES        | YES        | YES       |
| Year fixed effects    | YES        | YES        | YES        | YES        | YES        | YES       |

Notes: Cluster-robust standard errors reported in parentheses. \*  $p < 0.10$  \*\*  $p < 0.05$  \*\*\*  $p < 0.01$  \*\*\*\*  $p < 0.001$

### Forces of Nature, Conflict and Terrorism, Executions and Police Conflict

|                                   | (1)        | (2)        | (3)        | (4)        | (5)        | (6)        |
|-----------------------------------|------------|------------|------------|------------|------------|------------|
| All components included           | 0.0230     |            |            |            |            |            |
|                                   | (0.03398)  |            |            |            |            |            |
| Excluding free and fair elections |            | 0.0138     |            |            |            |            |
|                                   |            | (0.03379)  |            |            |            |            |
| Excluding free expression         |            |            | 0.0130     |            |            |            |
|                                   |            |            | (0.03308)  |            |            |            |
| Excluding free association        |            |            |            | 0.0124     |            |            |
|                                   |            |            |            | (0.03169)  |            |            |
| Excluding suffrage                |            |            |            |            | 0.0247     |            |
|                                   |            |            |            |            | (0.03345)  |            |
| Excluding elected officials       |            |            |            |            |            | 0.0202     |
|                                   |            |            |            |            |            | (0.03426)  |
| GDP per capita (ln)               | -1.1296*** | -1.1364*** | -1.1401*** | -1.1394*** | -1.1309*** | -1.1344*** |
|                                   | (0.03398)  | (0.36309)  | (0.35999)  | (0.36074)  | (0.36128)  | (0.36145)  |
| Urbanicity (ln)                   | -0.2797    | -0.2919    | -0.2841    | -0.2824    | -0.2787    | -0.2826    |
|                                   | (0.39816)  | (0.40424)  | (0.40406)  | (0.40642)  | (0.39700)  | (0.39976)  |

|                       |             |             |             |             |             |             |
|-----------------------|-------------|-------------|-------------|-------------|-------------|-------------|
| Mortality shock       | -0.2262**** | -0.2260**** | -0.2260**** | -0.2260**** | -0.2263**** | -0.2262**** |
|                       | (0.01077)   | (0.01073)   | (0.01077)   | (0.01078)   | (0.01078)   | (-0.01077)  |
| DAH per capita        | -0.0058**   | -0.0059**   | -0.0059**   | -0.0058**   | -0.0058**   | -0.0058**   |
|                       | (0.00279)   | (0.00279)   | (0.00278)   | (0.00279)   | (0.00278)   | (0.00280)   |
| Constant              | 6.7331*     | 6.8373*     | 6.9170**    | 6.9165**    | 6.7025*     | 6.7890*     |
|                       | (3.4603)    | (3.53831)   | (3.45775)   | (3.46121)   | (3.44095)   | (3.45377)   |
| Observations          | 3280        | 3280        | 3280        | 3280        | 3280        | 3280        |
| Countries             | 164         | 164         | 164         | 164         | 164         | 164         |
| Country fixed effects | YES         | YES         | YES         | YES         | YES         | YES         |
| Year fixed effects    | YES         | YES         | YES         | YES         | YES         | YES         |

Notes: Cluster-robust standard errors reported in parentheses. \*  $p < 0.10$  \*\*  $p < 0.05$  \*\*\*  $p < 0.01$  \*\*\*\*  $p < 0.001$

We also take a closer look at the sub-components that comprise free and fair elections. Those sub-components are (V-Dem label in parenthesis): vote buying (v2elvtobuy), electoral fraud (v2elrgstry & v2elirreg), intimidation of the opposition (v2elintim), and electoral board autonomy and capacity (v2elembaut & v2elembcap). The age-standardized cardiovascular death rate is regressed on the stock version of each of those sub-components, using the previous equation. Those regressions suggest vote buying is the sub-component that is the most negatively associated with cardiovascular mortality, followed by voting irregularities (includes ballot stuffing, false collation of votes, misreporting of votes) and manipulation of the voting registry.

**Table 2.4.2: Cardiovascular Deaths and the Sub-components of Free and Fair Elections**

|                                                  | (1)         | (2)         | (3)         | (4)         | (5)        | (6) |
|--------------------------------------------------|-------------|-------------|-------------|-------------|------------|-----|
| Absence of vote buying                           | -0.0273**** |             |             |             |            |     |
|                                                  | (0.00426)   |             |             |             |            |     |
| Absence of voting irregularities                 |             | -0.0241**** |             |             |            |     |
|                                                  |             | (0.00424)   |             |             |            |     |
| Absence of registration fraud                    |             |             | -0.0225**** |             |            |     |
|                                                  |             |             | (0.00472)   |             |            |     |
| Absence of government intimidation of opposition |             |             |             | -0.0179**** |            |     |
|                                                  |             |             |             | (0.00433)   |            |     |
| Electoral board capacity                         |             |             |             |             | -0.0156*** |     |

|                          |            |            |            |            |             |            |
|--------------------------|------------|------------|------------|------------|-------------|------------|
|                          |            |            |            |            | (0.00511)   |            |
| Electoral board autonomy |            |            |            |            |             | -0.00373   |
|                          |            |            |            |            |             | (0.00439)  |
| GDP per capita (ln)      | -0.0353    | -0.0566*   | -0.0554    | -0.0517    | -0.0231     | -0.0445    |
|                          | (0.0363)   | (0.0334)   | (0.0353)   | (0.0333)   | (0.0392)    | (0.0338)   |
| Urbanicity (ln)          | -0.0129    | -0.0104    | 0.0220     | 0.0188     | 0.0178      | 0.0194     |
|                          | (0.0462)   | (0.0416)   | (0.0416)   | (0.0448)   | (0.0421)    | (0.0338)   |
| Mortality shock          | 0.000382   | 0.000594   | 0.000450   | 0.000388   | -0.00000266 | 0.0000497  |
|                          | (0.000465) | (0.000415) | (0.000426) | (0.000477) | (0.000492)  | (0.000477) |
| DAH per capita           | 0.00108*** | 0.00112*** | 0.00125*** | 0.00117*** | 0.00117***  | 0.00126*** |
|                          | (0.000361) | (0.000372) | (0.000404) | (0.000376) | (0.000380)  | (0.000418) |
| Constant                 | 6.589****  | 6.716****  | 6.679****  | 6.534****  | 6.304****   | 6.175****  |
|                          | (0.327)    | (0.308)    | (0.326)    | (0.309)    | (0.337)     | (0.319)    |
| Observations             | 3280       | 3280       | 3280       | 3280       | 3280        | 3280       |
| Countries                | 164        | 164        | 164        | 164        | 164         | 164        |

Notes: Cluster-robust standard errors reported in parentheses. \*  $p < 0.10$  \*\*  $p < 0.05$  \*\*\*  $p < 0.01$  \*\*\*\*  $p < 0.001$

In addition, we introduce an interaction term in order to assess whether vote buying conditions the reductive effect of government health expenditure on the age-standardized cardiovascular death rate, as follows:

$$\begin{aligned} \text{Cardiovascular death rate}_{it} = & \beta_0 + \beta_1 (\text{Vote Buying Stock}_{it}) \\ & + \beta_2 \ln(\text{Government Health Expenditure as Source}_{it}) \\ & + \beta_3 \text{Vote Buying Stock}_{it} \times \ln(\text{Government Health Expenditure as Source}_{it}) \\ & + \beta_4 \ln(\text{GDP per capita}_{it}) \\ & + \beta_5 \ln(\text{Urbanicity}_{it}) + \beta_6 (\text{Mortality Shock}_{it}) + \beta_7 (\text{DAH per capita}_{it}) \\ & + \sum \tau_t 1(\text{year}) + \sum \delta_i 1(\text{iso}) + \epsilon_{it} \end{aligned}$$

The results of that model are presented in the following figure, Figure 2.4.1. The x-axis displays the democratic stock that accumulates as vote buying does not occur. The y-axis displays the marginal effect of government health expenditure (as source) on cardiovascular mortality as vote buying decreases. Reductions in vote buying magnify the reductive effect of government health spending on cardiovascular mortality. One hypothesis might be that vote buying leads to less health spending on low-income voters.

**Figure 2.4.1: Vote Buying, Government Health Expenditure (GHE), and Cardiovascular Deaths (All Ages)**

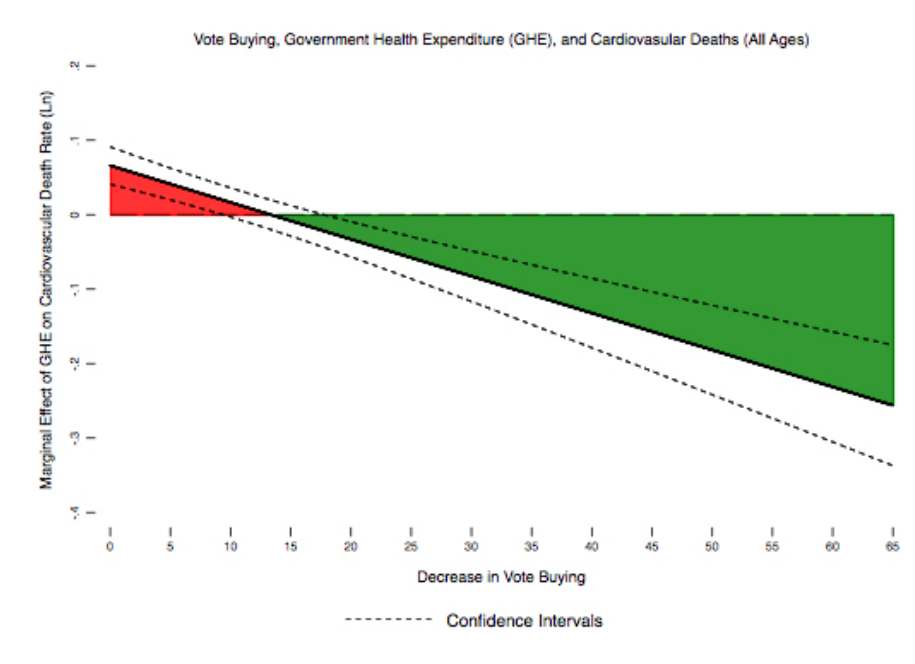

### 3.0 TABLES

**Table 3.1: Classification of Countries by GBD SDI Groupings**

| High SDI         | High-middle SDI                                  | Middle SDI             | Low-middle SDI   | Low SDI                          |
|------------------|--------------------------------------------------|------------------------|------------------|----------------------------------|
| Andorra          | Antigua and Barbuda                              | Albania                | Bangladesh       | Afghanistan                      |
| Australia        | Argentina                                        | Algeria                | Belize           | Angola                           |
| Austria          | Armenia                                          | American Samoa         | Bhutan           | Benin                            |
| Belgium          | Azerbaijan                                       | Bahrain                | Bolivia          | Burkina Faso                     |
| Canada           | Barbados                                         | Bali                   | Cambodia         | Burundi                          |
| Croatia          | Belarus                                          | Bosnia and Herzegovina | Cameroon         | Central African Republic         |
| Cyprus           | Bermuda                                          | Botswana               | Cape Verde       | Chad                             |
| Czech Republic   | Bulgaria                                         | Colombia               | Gabon            | Comoros                          |
| Denmark          | Chile                                            | Costa Rica             | Ghana            | Cote d'Ivoire                    |
| Estonia          | Cuba                                             | Dominica               | Guatemala        | Democratic Republic of the Congo |
| Finland          | Georgia                                          | Dominican Republic     | Honduras         | Djibouti                         |
| France           | Guam                                             | Ecuador                | Iraq             | Eritrea                          |
| Germany          | Hong Kong Special Administrative Region of China | Egypt                  | Kyrgyzstan       | Ethiopia                         |
| Greece           | Hungary                                          | El Salvador            | Laos             | Guinea                           |
| Iceland          | Iran                                             | Equatorial Guinea      | Lesotho          | Guinea-Bissau                    |
| Ireland          | Israel                                           | Fiji                   | Marshall Islands | Haiti                            |
| Italy            | Kazakhstan                                       | Grenada                | Mauritania       | Liberia                          |
| Latvia           | Kuwait                                           | Guyana                 | Morocco          | Madagascar                       |
| Luxembourg       | Lebanon                                          | Jamaica                | Myanmar          | Malawi                           |
| Malta            | Libya                                            | Jordan                 | Namibia          | Mali                             |
| Netherlands      | Macao Special Administrative Region of China     | Maldives               | Nepal            | Mozambique                       |
| New Zealand      | Macedonia                                        | Moldova                | Nicaragua        | Niger                            |
| Northern Ireland | Malaysia                                         | Mongolia               | Nigeria          | Palestine                        |
| Norway           | Mauritius                                        | Mexico                 | North Korea      | Papua New Guinea                 |
| Poland           | Montenegro                                       | Paraguay               | Pakistan         | Rwanda                           |

|                            |                      |                                  |             |                       |
|----------------------------|----------------------|----------------------------------|-------------|-----------------------|
| Singapore                  | Panama               | Peru                             | Papua       | Sao Tome and Principe |
| Slovakia                   | Portugal             | Philippines                      | Samoa       | Senegal               |
| Slovenia                   | Qatar                | Saint Lucia                      | Sudan       | Sierra Leone          |
| Sweden except Stockholm    | Romania              | Saint Vincent and the Grenadines | Swaziland   | Solomon Islands       |
| Switzerland                | Russia               | Seychelles                       | Syria       | Somalia               |
| Taiwan (Province of China) | Serbia               | Sri Lanka                        | Tajikistan  | South Sudan           |
|                            | Spain                | Suriname                         | Tibet       | Tanzania              |
|                            | The Bahamas          | Thailand                         | Timor-Leste | The Gambia            |
|                            | Trinidad and Tobago  | Tunisia                          | Vanuatu     | Togo                  |
|                            | Turkey               | Uruguay                          | Zambia      | Uganda                |
|                            | Turkmenistan         | Uzbekistan                       | Zimbabwe    | Yemen                 |
|                            | Ukraine              | Venezuela                        |             |                       |
|                            | United Arab Emirates | Vietnam                          |             |                       |

**Table 3.2: Classification of Countries by World Bank Income Groups**

| <b>High Income</b>     | <b>Upper-middle income</b> | <b>Lower-middle Income</b> | <b>Low Income</b>        |
|------------------------|----------------------------|----------------------------|--------------------------|
| Andorra                | Albania                    | Angola                     | Afghanistan              |
| Antigua and Barbuda    | Algeria                    | Bangladesh                 | Benin                    |
| Argentina              | American Samoa             | Bhutan                     | Burkina Faso             |
| Aruba                  | Armenia                    | Bolivia                    | Burundi                  |
| Australia              | Azerbaijan                 | Cabo Verde                 | Central African Republic |
| Austria                | Belarus                    | Cambodia                   | Chad                     |
| Bahamas, The           | Belize                     | Cameroon                   | Comoros                  |
| Bahrain                | Bosnia and Herzegovina     | Congo, Rep.                | Congo, Dem. Rep.         |
| Barbados               | Botswana                   | Côte d'Ivoire              | Eritrea                  |
| Belgium                | Brazil                     | Djibouti                   | Ethiopia                 |
| Bermuda                | Bulgaria                   | Egypt, Arab Rep.           | Gambia, The              |
| British Virgin Islands | China                      | El Salvador                | Guinea                   |
| Brunei Darussalam      | Colombia                   | Georgia                    | Guinea-Bissau            |
| Canada                 | Costa Rica                 | Ghana                      | Haiti                    |

|                      |                    |                       |                           |
|----------------------|--------------------|-----------------------|---------------------------|
| Cayman Islands       | Cuba               | Honduras              | Korea, Dem. People's Rep. |
| Channel Islands      | Dominica           | India                 | Liberia                   |
| Chile                | Dominican Republic | Indonesia             | Madagascar                |
| Croatia              | Ecuador            | Kenya                 | Malawi                    |
| Curaçao              | Equatorial Guinea  | Kiribati              | Mali                      |
| Cyprus               | Fiji               | Kosovo                | Mozambique                |
| Czech Republic       | Gabon              | Kyrgyz Republic       | Nepal                     |
| Denmark              | Grenada            | Lao PDR               | Niger                     |
| Estonia              | Guatemala          | Lesotho               | Rwanda                    |
| Faroe Islands        | Guyana             | Mauritania            | Senegal                   |
| Finland              | Iran, Islamic Rep. | Micronesia, Fed. Sts. | Sierra Leone              |
| France               | Iraq               | Moldova               | Somalia                   |
| French Polynesia     | Jamaica            | Mongolia              | South Sudan               |
| Germany              | Jordan             | Morocco               | Syrian Arab Republic      |
| Gibraltar            | Kazakhstan         | Myanmar               | Tajikistan                |
| Greece               | Lebanon            | Nicaragua             | Tanzania                  |
| Greenland            | Libya              | Nigeria               | Togo                      |
| Guam                 | Macedonia, FYR     | Pakistan              | Uganda                    |
| Hong Kong SAR, China | Malaysia           | Papua New Guinea      | Yemen, Rep.               |
| Hungary              | Maldives           | Philippines           | Zimbabwe                  |
| Iceland              | Marshall Islands   | São Tomé and Príncipe |                           |
| Ireland              | Mauritius          | Solomon Islands       |                           |
| Isle of Man          | Mexico             | Sri Lanka             |                           |
| Israel               | Montenegro         | Sudan                 |                           |
| Italy                | Namibia            | Swaziland             |                           |
| Japan                | Nauru              | Timor-Leste           |                           |
| Korea, Rep.          | Paraguay           | Tunisia               |                           |
| Kuwait               | Peru               | Ukraine               |                           |
| Latvia               | Romania            | Uzbekistan            |                           |
| Liechtenstein        | Russian Federation | Vanuatu               |                           |



|                           |                                |                    |  |
|---------------------------|--------------------------------|--------------------|--|
| Lithuania                 | Samoa                          | Vietnam            |  |
| Luxembourg                | Serbia                         | West Bank and Gaza |  |
| Macao SAR, China          | South Africa                   | Zambia             |  |
| Malta                     | St. Lucia                      |                    |  |
| Monaco                    | St. Vincent and the Grenadines |                    |  |
| Netherlands               | Suriname                       |                    |  |
| New Caledonia             | Thailand                       |                    |  |
| New Zealand               | Tonga                          |                    |  |
| Northern Mariana Islands  | Turkey                         |                    |  |
| Norway                    | Turkmenistan                   |                    |  |
| Oman                      | Tuvalu                         |                    |  |
| Palau                     | Venezuela, RB                  |                    |  |
| Panama                    |                                |                    |  |
| Poland                    |                                |                    |  |
| Portugal                  |                                |                    |  |
| Puerto Rico               |                                |                    |  |
| Qatar                     |                                |                    |  |
| San Marino                |                                |                    |  |
| Saudi Arabia              |                                |                    |  |
| Seychelles                |                                |                    |  |
| Singapore                 |                                |                    |  |
| Sint Maarten (Dutch part) |                                |                    |  |
| Slovak Republic           |                                |                    |  |
| Slovenia                  |                                |                    |  |
| Spain                     |                                |                    |  |
| St. Kitts and Nevis       |                                |                    |  |
| St. Martin (French part)  |                                |                    |  |
| Sweden                    |                                |                    |  |
| Switzerland               |                                |                    |  |
| Taiwan, China             |                                |                    |  |

|                          |  |  |  |
|--------------------------|--|--|--|
| Trinidad and Tobago      |  |  |  |
| Turks and Caicos Islands |  |  |  |
| United Arab Emirates     |  |  |  |
| United Kingdom           |  |  |  |
| United States            |  |  |  |
| Uruguay                  |  |  |  |
| Virgin Islands (U.S.)    |  |  |  |

**Table 3.3: Classification of Countries by Global Burden of Disease Super-Regions**

| <b>Central Europe, Eastern Europe, and Central Asia</b> | <b>High-income</b> | <b>Latin America and Caribbean</b> | <b>North Africa and Middle East</b> | <b>South Asia</b> | <b>Southeast Asia, East Asia, and Oceania</b> | <b>Sub-Saharan Africa</b> |
|---------------------------------------------------------|--------------------|------------------------------------|-------------------------------------|-------------------|-----------------------------------------------|---------------------------|
| Albania                                                 | Andorra            | Antigua                            | Afghanistan                         | Bangladesh        | Am Samoa                                      | Angola                    |
| Armenia                                                 | Argentina          | Barbados                           | Algeria                             | Bhutan            | Cambodia                                      | Benin                     |
| Azerbaijan                                              | Australia          | Belize                             | Bahrain                             | India             | China                                         | Botswana                  |
| Belarus                                                 | Austria            | Bermuda                            | Egypt                               | Nepal             | Micronesia                                    | Burkina Faso              |
| Bosnia                                                  | Belgium            | Bolivia                            | Iran                                | Pakistan          | Fiji                                          | Burundi                   |
| Bulgaria                                                | Brunei             | Brazil                             | Iraq                                |                   | Guam                                          | Cameroon                  |
| Croatia                                                 | Canada             | Colombia                           | Jordan                              |                   | Indonesia                                     | Cape Verde                |
| Czech                                                   | Chile              | Costa Rica                         | Kuwait                              |                   | Kiribati                                      | C African Rep             |
| Estonia                                                 | Cyprus             | Cuba                               | Lebanon                             |                   | Laos                                          | Chad                      |
| Georgia                                                 | Denmark            | Dominica                           | Libya                               |                   | Malaysia                                      | Comoros                   |
| Hungary                                                 | Finland            | Dominican Rep                      | Morocco                             |                   | Maldives                                      | Congo                     |
| Kazakhstan                                              | France             | Ecuador                            | Oman                                |                   | Marshall                                      | Cote d'Ivoire             |
| Kyrgyzstan                                              | Germany            | El Salvador                        | Palestine                           |                   | Mauritius                                     | Congo DR                  |
| Latvia                                                  | Greece             | Grenada                            | Qatar                               |                   | Myanmar                                       | Djibouti                  |
| Lithuania                                               | Greenland          | Guatemala                          | Saudi Arabia                        |                   | N Korea                                       | Eq Guinea                 |
| Macedonia                                               | Iceland            | Guyana                             | Sudan                               |                   | N Mariana                                     | Eritrea                   |
| Moldova                                                 | Ireland            | Haiti                              | Syria                               |                   | PNG                                           | Ethiopia                  |
| Mongolia                                                | Israel             | Honduras                           | Tunisia                             |                   | Philippines                                   | Gabon                     |
| Montenegro                                              | Italy              | Jamaica                            | Turkey                              |                   | Samoa                                         | Ghana                     |
| Poland                                                  | Japan              | Mexico                             | UAE                                 |                   | Seychelles                                    | Guinea                    |
| Romania                                                 | Luxembourg         | Nicaragua                          | Yemen                               |                   | Solomon                                       | Guinea-Bissau             |
| Russia                                                  | Malta              | Panama                             |                                     |                   | Sri Lanka                                     | Kenya                     |
| Serbia                                                  | Netherlands        | Paraguay                           |                                     |                   | Taiwan                                        | Lesotho                   |
| Slovakia                                                | New Zealand        | Peru                               |                                     |                   | Thailand                                      | Liberia                   |
| Slovenia                                                | Norway             | Puerto Rico                        |                                     |                   | Timor-Leste                                   | Madagascar                |
| Tajikistan                                              | Portugal           | St Lucia                           |                                     |                   | Tonga                                         | Malawi                    |
| Turkmenistan                                            | Singapore          | St Vincent                         |                                     |                   | Vanuatu                                       | Mali                      |
| Ukraine                                                 | S Korea            | Suriname                           |                                     |                   | Vietnam                                       | Mauritania                |
| Uzbekistan                                              | Spain              | Bahamas                            |                                     |                   |                                               | Mozambique                |

|  |             |                 |  |  |                      |
|--|-------------|-----------------|--|--|----------------------|
|  | Sweden      | Trinidad Tobago |  |  | Namibia              |
|  | Switzerland | Venezuela       |  |  | Niger                |
|  | UK          | Virgin Isl US   |  |  | Nigeria              |
|  | US          |                 |  |  | Rwanda               |
|  | Uruguay     |                 |  |  | Sao Tome<br>Principe |
|  |             |                 |  |  | Senegal              |
|  |             |                 |  |  | Sierra Leone         |
|  |             |                 |  |  | Somalia              |
|  |             |                 |  |  | S Africa             |
|  |             |                 |  |  | S Sudan              |
|  |             |                 |  |  | Swaziland            |
|  |             |                 |  |  | Tanzania             |
|  |             |                 |  |  | Gambia               |
|  |             |                 |  |  | Togo                 |
|  |             |                 |  |  | Uganda               |
|  |             |                 |  |  | Zambia               |
|  |             |                 |  |  | Zimbabwe             |

**Table 3.5. Global Burden of Disease Cause List**  
**1. Communicable Diseases**

|                                                                          |                    |                                                                               |
|--------------------------------------------------------------------------|--------------------|-------------------------------------------------------------------------------|
| <b>HIV/AIDS and tuberculosis</b>                                         |                    |                                                                               |
|                                                                          | Tuberculosis       |                                                                               |
|                                                                          |                    | Drug-susceptible tuberculosis                                                 |
|                                                                          |                    | Multidrug-resistant tuberculosis without extensive drug resistance            |
|                                                                          |                    | Extensively drug resistant tuberculosis                                       |
|                                                                          | HIV/AIDS           |                                                                               |
|                                                                          |                    | Drug-susceptible HIV/AIDS - Tuberculosis                                      |
|                                                                          |                    | Multidrug-resistant HIV/AIDS - Tuberculosis without extensive drug resistance |
|                                                                          |                    | Extensively drug resistant HIV/AIDS - Tuberculosis                            |
|                                                                          |                    | HIV/AIDS resulting in other diseases                                          |
| <b>Diarrhea, lower respiratory, and other common infectious diseases</b> |                    |                                                                               |
|                                                                          | Diarrheal diseases |                                                                               |
|                                                                          |                    | Cholera                                                                       |
|                                                                          |                    | Other salmonella infections                                                   |
|                                                                          |                    | Shigellosis                                                                   |
|                                                                          |                    | Enteropathogenic E coli infection                                             |
|                                                                          |                    | Enterotoxigenic E coli infection                                              |
|                                                                          |                    | Campylobacter enteritis                                                       |
|                                                                          |                    | Amoebiasis                                                                    |
|                                                                          |                    | Cryptosporidiosis                                                             |
|                                                                          |                    | Rotaviral enteritis                                                           |

|                                                |                                       |
|------------------------------------------------|---------------------------------------|
|                                                | Aeromonas                             |
|                                                | Clostridium difficile                 |
|                                                | Norovirus                             |
|                                                | Adenovirus                            |
|                                                | Other bacterial foodborne diarrhea    |
|                                                | Other diarrheal diseases              |
| Intestinal infectious diseases                 |                                       |
|                                                | Typhoid fever                         |
|                                                | Paratyphoid fever                     |
|                                                | Other intestinal infectious diseases  |
| Lower respiratory infections                   |                                       |
|                                                | Influenza                             |
|                                                | Pneumococcal pneumonia                |
|                                                | H influenzae type B pneumonia         |
|                                                | Respiratory syncytial virus pneumonia |
|                                                | Other lower respiratory infections    |
| Upper respiratory infections                   |                                       |
| Otitis media                                   |                                       |
| Meningitis                                     |                                       |
|                                                | Pneumococcal meningitis               |
|                                                | H influenzae type B meningitis        |
|                                                | Meningococcal meningitis              |
|                                                | Other meningitis                      |
| Encephalitis                                   |                                       |
| Diphtheria                                     |                                       |
| Whooping cough                                 |                                       |
| Tetanus                                        |                                       |
| Measles                                        |                                       |
| Varicella and herpes zoster                    |                                       |
| <b>Neglected tropical diseases and malaria</b> |                                       |
| Malaria                                        |                                       |
| Chagas disease                                 |                                       |
| Leishmaniasis                                  |                                       |
|                                                | Visceral leishmaniasis                |
| African trypanosomiasis                        |                                       |
| Schistosomiasis                                |                                       |
| Cysticercosis                                  |                                       |
| Cystic echinococcosis                          |                                       |
| Dengue                                         |                                       |
| Yellow fever                                   |                                       |
| Rabies                                         |                                       |
| Intestinal nematode infections                 |                                       |
|                                                | Ascariasis                            |

|                                                                         |                                                          |
|-------------------------------------------------------------------------|----------------------------------------------------------|
|                                                                         | Ebola                                                    |
|                                                                         | Zika virus                                               |
|                                                                         | Other neglected tropical diseases                        |
| <b>Maternal disorders</b>                                               |                                                          |
|                                                                         | Maternal hemorrhage                                      |
|                                                                         | Maternal sepsis and other maternal infections            |
|                                                                         | Maternal hypertensive disorders                          |
|                                                                         | Maternal obstructed labor and uterine rupture            |
|                                                                         | Maternal abortion, miscarriage, and ectopic pregnancy    |
|                                                                         | Indirect maternal deaths                                 |
|                                                                         | Late maternal deaths                                     |
|                                                                         | Maternal deaths aggravated by HIV/AIDS                   |
|                                                                         | Other maternal disorders                                 |
| <b>Neonatal disorders</b>                                               |                                                          |
|                                                                         | Neonatal preterm birth complications                     |
|                                                                         | Neonatal encephalopathy due to birth asphyxia and trauma |
|                                                                         | Neonatal sepsis and other neonatal infections            |
|                                                                         | Hemolytic disease and other neonatal jaundice            |
|                                                                         | Other neonatal disorders                                 |
| <b>Nutritional deficiencies</b>                                         |                                                          |
|                                                                         | Protein-energy malnutrition                              |
|                                                                         | Iodine deficiency                                        |
|                                                                         | Iron-deficiency anemia                                   |
|                                                                         | Other nutritional deficiencies                           |
| <b>Other communicable, maternal, neonatal, and nutritional diseases</b> |                                                          |
|                                                                         | Sexually transmitted diseases excluding HIV              |
|                                                                         | Syphilis                                                 |
|                                                                         | Chlamydial infection                                     |
|                                                                         | Other sexually transmitted diseases                      |
|                                                                         | Hepatitis                                                |
|                                                                         | Acute hepatitis A                                        |
|                                                                         | Hepatitis B                                              |
|                                                                         | Hepatitis C                                              |
|                                                                         | Acute hepatitis E                                        |
|                                                                         | Other infectious diseases                                |

## 2. Non-communicable Diseases

|                  |                            |
|------------------|----------------------------|
| <b>Neoplasms</b> |                            |
|                  | Lip and oral cavity cancer |
|                  | Nasopharynx cancer         |
|                  | Other pharynx cancer       |
|                  | Esophageal cancer          |

|                                |                                                    |
|--------------------------------|----------------------------------------------------|
|                                | Stomach cancer                                     |
|                                | Colon and rectum cancer                            |
|                                | Liver cancer                                       |
|                                | Liver cancer due to hepatitis B                    |
|                                | Liver cancer due to hepatitis C                    |
|                                | Liver cancer due to alcohol use                    |
|                                | Liver cancer due to other causes                   |
|                                | Gallbladder and biliary tract cancer               |
|                                | Pancreatic cancer                                  |
|                                | Larynx cancer                                      |
|                                | Tracheal, bronchus, and lung cancer                |
|                                | Malignant skin melanoma                            |
|                                | Non-melanoma skin cancer                           |
|                                | Non-melanoma skin cancer (squamous-cell carcinoma) |
|                                | Non-melanoma skin cancer (basal cell carcinoma)    |
|                                | Breast cancer                                      |
|                                | Cervical cancer                                    |
|                                | Uterine cancer                                     |
|                                | Ovarian cancer                                     |
|                                | Prostate cancer                                    |
|                                | Testicular cancer                                  |
|                                | Kidney cancer                                      |
|                                | Bladder cancer                                     |
|                                | Brain and nervous system cancer                    |
|                                | Thyroid cancer                                     |
|                                | Mesothelioma                                       |
|                                | Hodgkin lymphoma                                   |
|                                | Non-Hodgkin lymphoma                               |
|                                | Multiple myeloma                                   |
|                                | Leukemia                                           |
|                                | Acute lymphoid leukemia                            |
|                                | Chronic lymphoid leukemia                          |
|                                | Acute myeloid leukemia                             |
|                                | Chronic myeloid leukemia                           |
|                                | Other neoplasms                                    |
| <b>Cardiovascular diseases</b> |                                                    |
|                                | Rheumatic heart disease                            |
|                                | Ischemic heart disease                             |
|                                | Cerebrovascular disease                            |

|                                                   |                                                                |                             |
|---------------------------------------------------|----------------------------------------------------------------|-----------------------------|
|                                                   |                                                                | Ischemic stroke             |
|                                                   |                                                                | Hemorrhagic stroke          |
|                                                   | Hypertensive heart disease                                     |                             |
|                                                   | Cardiomyopathy and myocarditis                                 |                             |
|                                                   | Atrial fibrillation and flutter                                |                             |
|                                                   | Aortic aneurysm                                                |                             |
|                                                   | Peripheral vascular disease                                    |                             |
|                                                   | Endocarditis                                                   |                             |
|                                                   | Other cardiovascular and circulatory diseases                  |                             |
| <b>Chronic respiratory diseases</b>               |                                                                |                             |
|                                                   | Chronic obstructive pulmonary disease                          |                             |
|                                                   | Pneumoconiosis                                                 |                             |
|                                                   |                                                                | Silicosis                   |
|                                                   |                                                                | Asbestosis                  |
|                                                   |                                                                | Coal workers pneumoconiosis |
|                                                   |                                                                | Other pneumoconiosis        |
|                                                   | Asthma                                                         |                             |
|                                                   | Interstitial lung disease and pulmonary sarcoidosis            |                             |
|                                                   | Other chronic respiratory diseases                             |                             |
| <b>Cirrhosis and other chronic liver diseases</b> |                                                                |                             |
|                                                   | Cirrhosis and other chronic liver diseases due to hepatitis B  |                             |
|                                                   | Cirrhosis and other chronic liver diseases due to hepatitis C  |                             |
|                                                   | Cirrhosis and other chronic liver diseases due to alcohol use  |                             |
|                                                   | Cirrhosis and other chronic liver diseases due to other causes |                             |
| <b>Digestive diseases</b>                         |                                                                |                             |
|                                                   | Peptic ulcer disease                                           |                             |
|                                                   | Gastritis and duodenitis                                       |                             |
|                                                   | Appendicitis                                                   |                             |
|                                                   | Paralytic ileus and intestinal obstruction                     |                             |
|                                                   | Inguinal, femoral, and abdominal hernia                        |                             |
|                                                   | Inflammatory bowel disease                                     |                             |
|                                                   | Vascular intestinal disorders                                  |                             |
|                                                   | Gallbladder and biliary diseases                               |                             |
|                                                   | Pancreatitis                                                   |                             |
|                                                   | Other digestive diseases                                       |                             |
| <b>Neurological disorders</b>                     |                                                                |                             |
|                                                   | Alzheimer disease and other dementias                          |                             |
|                                                   | Parkinson disease                                              |                             |
|                                                   | Epilepsy                                                       |                             |
|                                                   | Multiple sclerosis                                             |                             |
|                                                   | Motor neuron disease                                           |                             |

|                                                            |                                                     |
|------------------------------------------------------------|-----------------------------------------------------|
|                                                            | Tension-type headache                               |
|                                                            | Medication overuse headache                         |
|                                                            | Other neurological disorders                        |
| <b>Mental and substance use disorders</b>                  |                                                     |
|                                                            | Schizophrenia                                       |
|                                                            | Alcohol use disorders                               |
|                                                            | Drug use disorders                                  |
|                                                            | Opioid use disorders                                |
|                                                            | Cocaine use disorders                               |
|                                                            | Amphetamine use disorders                           |
|                                                            | Cannabis use disorders                              |
|                                                            | Other drug use disorders                            |
|                                                            | Depressive disorders                                |
|                                                            | Major depressive disorder                           |
|                                                            | Dysthymia                                           |
|                                                            | Bipolar disorder                                    |
|                                                            | Anxiety disorders                                   |
|                                                            | Eating disorders                                    |
|                                                            | Anorexia nervosa                                    |
|                                                            | Bulimia nervosa                                     |
|                                                            | Autistic spectrum disorders                         |
|                                                            | Autism                                              |
|                                                            | Asperger syndrome                                   |
|                                                            | Attention-deficit/hyperactivity disorder            |
|                                                            | Conduct disorder                                    |
|                                                            | Idiopathic intellectual disability                  |
|                                                            | Other mental and substance use disorders            |
| <b>Diabetes, urogenital, blood, and endocrine diseases</b> |                                                     |
|                                                            | Diabetes mellitus                                   |
|                                                            | Acute glomerulonephritis                            |
|                                                            | Chronic kidney disease                              |
|                                                            | Chronic kidney disease due to diabetes mellitus     |
|                                                            | Chronic kidney disease due to hypertension          |
|                                                            | Chronic kidney disease due to glomerulonephritis    |
|                                                            | Chronic kidney disease due to other causes          |
|                                                            | Urinary diseases and male infertility               |
|                                                            | Interstitial nephritis and urinary tract infections |
|                                                            | Urolithiasis                                        |
|                                                            | Benign prostatic hyperplasia                        |
|                                                            | Male infertility due to other causes                |
|                                                            | Other urinary diseases                              |



|  |                                                   |                                                |
|--|---------------------------------------------------|------------------------------------------------|
|  | Gynecological diseases                            |                                                |
|  |                                                   | Uterine fibroids                               |
|  |                                                   | Polycystic ovarian syndrome                    |
|  |                                                   | Female infertility due to other causes         |
|  |                                                   | Endometriosis                                  |
|  |                                                   | Genital prolapse                               |
|  |                                                   | Premenstrual syndrome                          |
|  |                                                   | Other gynecological diseases                   |
|  | Hemoglobinopathies and hemolytic anemias          |                                                |
|  |                                                   | Thalassemias                                   |
|  |                                                   | Thalassemia trait                              |
|  |                                                   | Sickle cell disorders                          |
|  |                                                   | Sickle cell trait                              |
|  |                                                   | G6PD deficiency                                |
|  |                                                   | G6PD trait                                     |
|  |                                                   | Other hemoglobinopathies and hemolytic anemias |
|  | Endocrine, metabolic, blood, and immune disorders |                                                |
|  | <b>Musculoskeletal disorders</b>                  |                                                |
|  | Rheumatoid arthritis                              |                                                |
|  | Osteoarthritis                                    |                                                |
|  | Low back and neck pain                            |                                                |
|  |                                                   | Low back pain                                  |
|  |                                                   | Neck pain                                      |
|  | Gout                                              |                                                |
|  | Other musculoskeletal disorders                   |                                                |
|  | <b>Other non-communicable diseases</b>            |                                                |
|  | Congenital anomalies                              |                                                |
|  |                                                   | Neural tube defects                            |
|  |                                                   | Congenital heart anomalies                     |
|  |                                                   | Orofacial clefts                               |
|  |                                                   | Down syndrome                                  |
|  |                                                   | Turner syndrome                                |
|  |                                                   | Klinefelter syndrome                           |
|  |                                                   | Chromosomal unbalanced rearrangements          |
|  |                                                   | Other chromosomal abnormalities                |
|  | Skin and subcutaneous diseases                    |                                                |
|  |                                                   | Dermatitis                                     |
|  |                                                   | Psoriasis                                      |
|  |                                                   | Cellulitis                                     |

|  |                              |                                      |
|--|------------------------------|--------------------------------------|
|  |                              | Pyoderma                             |
|  |                              | Scabies                              |
|  |                              | Fungal skin diseases                 |
|  |                              | Viral skin diseases                  |
|  |                              | Acne vulgaris                        |
|  |                              | Alopecia areata                      |
|  |                              | Pruritus                             |
|  |                              | Urticaria                            |
|  |                              | Decubitus ulcer                      |
|  |                              | Other skin and subcutaneous diseases |
|  | Sense organ diseases         |                                      |
|  |                              | Glaucoma                             |
|  |                              | Cataract                             |
|  |                              | Macular degeneration                 |
|  |                              | Uncorrected refractive error         |
|  |                              | Other hearing loss                   |
|  |                              | Other vision loss                    |
|  |                              | Other sense organ diseases           |
|  | Oral disorders               |                                      |
|  |                              | Deciduous caries                     |
|  |                              | Permanent caries                     |
|  |                              | Periodontal diseases                 |
|  |                              | Edentulism and severe tooth loss     |
|  |                              | Other oral disorders                 |
|  | Sudden infant death syndrome |                                      |

### 3. Injuries

|                               |                               |                             |
|-------------------------------|-------------------------------|-----------------------------|
| <b>Transport injuries</b>     |                               |                             |
|                               | Road injuries                 |                             |
|                               |                               | Pedestrian road injuries    |
|                               |                               | Cyclist road injuries       |
|                               |                               | Motorecyclist road injuries |
|                               |                               | Motor vehicle road injuries |
|                               |                               | Other road injuries         |
|                               | Other transport injuries      |                             |
| <b>Unintentional Injuries</b> |                               |                             |
|                               | Falls                         |                             |
|                               | Drowning                      |                             |
|                               | Fire, heat and hot substances |                             |
|                               | Poisonings                    |                             |
|                               | Exposure to mechanical forces |                             |

|                                                                                 |                                      |                                                 |
|---------------------------------------------------------------------------------|--------------------------------------|-------------------------------------------------|
|                                                                                 |                                      | Unintentional firearm injuries                  |
|                                                                                 |                                      | Unintentional suffocation                       |
|                                                                                 |                                      | Other exposure to mechanical forces             |
|                                                                                 | Adverse effects of medical treatment |                                                 |
|                                                                                 | Animal contact                       |                                                 |
|                                                                                 |                                      | Venomous animal contact                         |
|                                                                                 |                                      | Non-venomous animal contact                     |
|                                                                                 | Foreign body                         |                                                 |
|                                                                                 |                                      | Pulmonary aspiration and foreign body in airway |
|                                                                                 |                                      | Foreign body in other body part                 |
|                                                                                 | Environmental heat and cold exposure |                                                 |
|                                                                                 | Other unintentional injuries         |                                                 |
| <b>Self-harm and interpersonal violence</b>                                     |                                      |                                                 |
|                                                                                 | Self-harm                            |                                                 |
|                                                                                 |                                      | Self-harm by firearm                            |
|                                                                                 |                                      | Self-harm by other specified means              |
|                                                                                 | Interpersonal violence               |                                                 |
|                                                                                 |                                      | Physical violence by firearm                    |
|                                                                                 |                                      | Physical violence by sharp object               |
|                                                                                 |                                      | Physical violence by other means                |
| <b>Forces of nature, conflict and terrorism, executions and police conflict</b> |                                      |                                                 |
|                                                                                 | Exposure to forces of nature         |                                                 |
|                                                                                 | Conflict and terrorism               |                                                 |
|                                                                                 | Executions and police conflict       |                                                 |

## Supplementary Methods Annex Works Cited

1. Global Burden of Disease Collaborative Network, Institute for Health Metrics and Evaluation. Global Burden of Disease Study 2016 (GBD 2016) disability-adjusted life years and healthy life expectancy 1990-2016. 2017.  
<http://ghdx.healthdata.org/record/global-burden-disease-study-2016-gbd-2016-disability-adjusted-life-years-and-healthy-life> (accessed July 10, 2018).
2. Global Burden of Disease Collaborative Network, Institute for Health Metrics and Evaluation. Global Burden of Disease Study 2016 (GBD 2016) all-cause under-5 mortality, adult mortality, and life expectancy 1970-2016. 2017.  
<http://ghdx.healthdata.org/record/global-burden-disease-study-2016-gbd-2016-all-cause-under-5-mortality-adult-mortality-and> (accessed July 10, 2018).
3. Global Burden of Disease Collaborative Network, Institute for Health Metrics and Evaluation. Global Burden of Disease Study 2016 (GBD 2016) covariates 1980-2016. 2017.  
<http://ghdx.healthdata.org/record/global-burden-disease-study-2016-gbd-2016-covariates-1980-2016> (accessed July 10, 2018).
4. GBD 2015 Risk Factors Collaborators. Global, regional, and national comparative risk assessment of 79 behavioural, environmental and occupational, and metabolic risks or clusters of risks, 1990–2015: a systematic analysis for the Global Burden of Disease Study 2015. *Lancet* 2016; **388**: 1659–1724.
5. Institute for Health Metrics and Evaluation (IHME). Development assistance for health database 1990-2017. Seattle: Institute for Health Metrics and Evaluation, 2017.  
<http://www.healthdata.org/policy-report/financing-global-health-2017> (accessed July 10, 2018).
6. Dieleman JL, Haakenstad A, Micah A et al. Spending on health and HIV/AIDS: domestic health spending and development assistance in 188 countries, 1995–2015. *Lancet* 2018; **391**: 1799–829.
7. Global Burden of Disease Health Financing Collaborator Network. Global health spending 1995-2015. Seattle: Institute for Health Metrics and Evaluation, 2017.  
<http://ghdx.healthdata.org/record/global-health-spending-1995-2015> (accessed July 10, 2018).
8. Global Burden of Disease Collaborative Network. Global Burden of Disease Study 2016 (GBD 2016) population estimates 1950-2016. Seattle: Institute for Health Metrics and Evaluation, 2017.  
<http://ghdx.healthdata.org/record/global-burden-disease-study-2016-gbd-2016-population-estimates-1950-2016> (last accessed July 10, 2018).
9. Global Burden of Disease Collaborative Network. Global Burden of Disease Study 2016 (GBD 2016) socio-demographic index (SDI) 1970–2016. Seattle: Institute for Health Metrics and Evaluation, 2017.  
<http://ghdx.healthdata.org/record/global-burden-disease-study-2016-gbd-2016-socio-demographic-index-sdi-1970-2016> (accessed July 10, 2018).
10. Institute for Health Metrics and Evaluation (IHME). Global educational attainment 1970-2015. Seattle: Institute for Health Metrics and Evaluation, 2015.  
<http://ghdx.healthdata.org/record/global-educational-attainment-1970-2015> (accessed July 10, 2018).
11. Institute for Health Metrics and Evaluation (IHME). Infant and child mortality estimates by country 1970-2010. Seattle: Institute for Health Metrics and Evaluation, 2010.  
<http://ghdx.healthdata.org/record/infant-and-child-mortality-estimates-country-1970-2010> (accessed July 10, 2018).
12. Coppedge M, Gerring J, Knutsen CH et al. V-Dem [country-year/country-date] D=dataset v8. Var. Democr. V-Dem Proj. 2018. <https://www.v-dem.net/en/data/data-version-8/> (accessed July 10, 2018).
13. Pemstein D, Marquardt KL, Tzelgov E, Wang Y, Krusell J, Miri F. The V-Dem measurement model: latent variable analysis for cross-national and cross-temporal expert-coded data. University of Gothenburg: Varieties of Democracy Institute, 2018. <http://dx.doi.org/10.2139/ssrn.3167764> (accessed July 10, 2018).
14. Munck GL, Verkuilen J. Conceptualizing and measuring democracy: evaluating alternative indices. *Comp Polit Stud* 2002; **35**: 5–34.
15. Coppedge M, Gerring J, Altman D et al. Conceptualizing and measuring democracy: a new approach. *Perspect Polit* 2011; **9**: 247–67.
16. Dahl RA. Polyarchy: participation and opposition. Yale University Press, 1971.
17. Teorell J, Coppedge M, Skaaning SE, Lindberg SII. Measuring electoral democracy with V-Dem data: introducing a new polyarchy index. University of Gothenburg: Varieties of Democracy Institute, 2016.

18. Gerring J, Thacker SC, Alfaro R. Democracy and human development. *J Polit* 2012; **74**: 1–17.
19. United Nations Population Division. Urban population (% of total). The World Bank. 2018. <https://data.worldbank.org/indicator/SP.URB.TOTL.IN.ZS> (accessed July 10, 2018).
20. World Bank. World development indicators 2017. World Bank. 2017. <https://openknowledge.worldbank.org/handle/10986/26447?locale-attribute=en> (accessed July 10, 2018).
21. Nunn N, Puga D. Ruggedness: the blessing of bad geography in Africa. *Rev Econ Stat* 2012; **94**: 20–36.
22. Abadie A, Gardeazabal J. The economic costs of conflict: a case study of the Basque country. *Am Econ Rev* 2003; **93**: 113–32.
23. Abadie A, Diamond A, Hainmueller J. Synthetic control methods for comparative case studies: estimating the effect of California’s tobacco control program. *J Am Stat Assoc* 2010; **105**: 493–505.
24. Cheibub JA, Gandhi J, Vreeland JR. Democracy and dictatorship revisited. *Public Choice* 2009; **143**: 67–101.
25. Blaydes L, Kayser MA. Counting calories: democracy and distribution in the developing world. *Int Stud Q* 2011; **55**: 887–908.
26. Abadie A, Diamond A, Hainmueller J. Comparative politics and the synthetic control method. *American Journal of Political Science*. 2015; **59**: 495-510.
27. Galiani S, Quistorff B. The synth\_runner package: utilities to automate synthetic control estimation using synth. *Stata J* 2017; **17**: 834–49.
28. Cavallo E, Galiani S, Noy I, Pantano J. Catastrophic natural disasters and economic growth. *Rev Econ Stat* 2013; **95**: 1549–61.
29. Groemping U, Matthias L. Package 'relaimpo': relative importance of regressors in linear models 2010, version 2.2-3. 2018. <https://cran.r-project.org/web/packages/relaimpo/relaimpo.pdf> (accessed July 9, 2018).
30. Greene WH. Econometric analysis. Upper Saddle River: Prentice Hall, 2012.
31. Lindeman RH, Merenda PF, Gold RZ. Introduction to bivariate and multivariate analysis. Glenview, IL: Scott, Foresman and Company, 1980.
32. Dieleman JL, Templin T, Sadat N, et al. National spending on health by source for 184 countries between 2013 and 2040. *Lancet* 2016; **387**: 2521–35.
